# Supplementary material
Source: publisher figshare collection journal article supplement (https://diabetesjournals.figshare.com/ndownloader/files/28057458)
Supplement: Supplementary file 1 [file 28057458]

## Sheet: TRAV-TRAJ
Table S3: TRAV/TRAJ-usage in TCRs expressed by Treg newly developing in the NOD and B6 thymus
TRAV	TRAJ	B6 Replicate 1 (%)	B6 Replicate 2 (%)	B6 Replicate 3 (%)	NOD Replicate 1 (%)	NOD Replicate 2 (%)	NOD Replicate 3 (%)	mean B6	s.d. B6	mean NOD	s.d. NOD	Log2(FC NOD/B6)	pValue
TRAV1	TRAJ2	0	0	0	0.0095	0	0	0	0	0.0032	0.0055	0.0046	0.2525
TRAV1	TRAJ4	0.0111	0	0	0	0	0	0.0037	0.0064	0	0	-0.0053	0.2525
TRAV1	TRAJ6	0.0223	0.0409	0	0	0.0486	0	0.0211	0.0205	0.0162	0.0281	-0.0069	0.5
TRAV1	TRAJ9	0	0.0082	0	0.0189	0.0365	0	0.0027	0.0047	0.0185	0.0183	0.0226	0.1768
TRAV1	TRAJ11	0	0.0246	0	0	0	0	0.0082	0.0142	0	0	-0.0118	0.2525
TRAV1	TRAJ12	0.0557	0.0164	0.0418	0	0.0851	0.0085	0.038	0.0199	0.0312	0.0469	-0.0095	0.3313
TRAV1	TRAJ13	0.0334	0.0082	0	0.0379	0.0365	0	0.0139	0.0174	0.0248	0.0215	0.0154	0.2533
TRAV1	TRAJ15	0.0446	0.0491	0	0.0189	0.0608	0.0338	0.0312	0.0271	0.0378	0.0212	0.0092	0.5
TRAV1	TRAJ16	0	0.0328	0	0.0284	0	0.0169	0.0109	0.0189	0.0151	0.0143	0.006	0.5
TRAV1	TRAJ17	0.0334	0.0655	0.0251	0.0189	0.0365	0.0423	0.0413	0.0213	0.0326	0.0122	-0.0121	0.5
TRAV1	TRAJ18	0.0223	0.1065	0.1172	0.0284	0.0486	0.0085	0.082	0.052	0.0285	0.0201	-0.0732	0.1914
TRAV1	TRAJ21	0.0668	0.0409	0.1172	0.0379	0.0972	0.0338	0.075	0.0388	0.0563	0.0355	-0.0253	0.1914
TRAV1	TRAJ22	0.0557	0.0328	0.0921	0.0852	0.0243	0	0.0602	0.0299	0.0365	0.0439	-0.0326	0.1914
TRAV1	TRAJ23	0.1003	0.0983	0.0335	0.1136	0.1337	0.0761	0.0774	0.038	0.1078	0.0292	0.0401	0.1914
TRAV1	TRAJ24	0.0334	0.0164	0	0.0284	0	0.0338	0.0166	0.0167	0.0207	0.0182	0.0058	0.4124
TRAV1	TRAJ26	0.0334	0.0409	0.0753	0.0379	0.0851	0.0085	0.0499	0.0223	0.0438	0.0386	-0.0084	0.5
TRAV1	TRAJ27	0.0446	0.0737	0.0586	0.0757	0.0365	0.0169	0.059	0.0146	0.043	0.0299	-0.022	0.3313
TRAV1	TRAJ28	0	0	0	0.0095	0	0	0	0	0.0032	0.0055	0.0046	0.2525
TRAV1	TRAJ30	0.0668	0.0328	0.0251	0.0379	0.0365	0.0676	0.0416	0.0222	0.0473	0.0176	0.0079	0.1914
TRAV1	TRAJ31	0.0446	0.0819	0.0753	0.0568	0.1823	0.1437	0.0673	0.0199	0.1276	0.0643	0.0793	0.1914
TRAV1	TRAJ32	0.0557	0.0409	0.0251	0.0757	0.0851	0.1944	0.0406	0.0153	0.1184	0.066	0.104	0.0404
TRAV1	TRAJ33	0	0	0.0502	0.0284	0	0.0592	0.0167	0.029	0.0292	0.0296	0.0176	0.3214
TRAV1	TRAJ34	0.0223	0.0164	0.0502	0.0095	0.0365	0.0085	0.0296	0.0181	0.0182	0.0159	-0.0161	0.1914
TRAV1	TRAJ35	0.0111	0	0	0.0284	0	0	0.0037	0.0064	0.0095	0.0164	0.0083	0.5
TRAV1	TRAJ37	0	0.0328	0	0.0095	0.0365	0	0.0109	0.0189	0.0153	0.0189	0.0063	0.3214
TRAV1	TRAJ38	0	0	0	0.0095	0	0.0254	0	0	0.0116	0.0128	0.0166	0.0984
TRAV1	TRAJ39	0.0111	0.0409	0.0837	0.0284	0.0608	0.0845	0.0452	0.0365	0.0579	0.0282	0.0174	0.3313
TRAV1	TRAJ40	0.0223	0	0	0.0379	0	0.0338	0.0074	0.0129	0.0239	0.0208	0.0234	0.1768
TRAV1	TRAJ42	0.0111	0	0	0	0	0	0.0037	0.0064	0	0	-0.0053	0.2525
TRAV1	TRAJ43	0.0557	0	0	0	0	0.0423	0.0186	0.0322	0.0141	0.0244	-0.0064	0.5
TRAV1	TRAJ44	0	0.0246	0	0.0095	0.0122	0	0.0082	0.0142	0.0072	0.0064	-0.0014	0.5
TRAV2	TRAJ4	0.0334	0.0164	0.0502	0	0	0	0.0333	0.0169	0	0	-0.0473	0.0318
TRAV2	TRAJ5	0.0111	0	0	0	0	0	0.0037	0.0064	0	0	-0.0053	0.2525
TRAV2	TRAJ6	0.0111	0	0	0	0	0	0.0037	0.0064	0	0	-0.0053	0.2525
TRAV2	TRAJ9	0.0111	0.0409	0	0	0	0	0.0173	0.0212	0	0	-0.0247	0.0984
TRAV2	TRAJ11	0	0	0	0.0095	0	0	0	0	0.0032	0.0055	0.0046	0.2525
TRAV2	TRAJ12	0.0111	0	0	0.0095	0	0	0.0037	0.0064	0.0032	0.0055	-0.0007	0.5
TRAV2	TRAJ13	0.0334	0	0	0.0095	0	0	0.0111	0.0193	0.0032	0.0055	-0.0113	0.5
TRAV2	TRAJ16	0.0111	0.0164	0.0251	0.0095	0	0.0423	0.0175	0.0071	0.0173	0.0222	-0.0003	0.3313
TRAV2	TRAJ17	0.0111	0.0164	0	0	0	0	0.0092	0.0084	0	0	-0.0132	0.0984
TRAV2	TRAJ18	0.0111	0.0246	0	0.0095	0	0	0.0119	0.0123	0.0032	0.0055	-0.0125	0.1768
TRAV2	TRAJ21	0	0.0082	0.0335	0.0379	0.0365	0	0.0139	0.0175	0.0248	0.0215	0.0154	0.2533
TRAV2	TRAJ22	0	0	0.0251	0.0379	0	0.0338	0.0084	0.0145	0.0239	0.0208	0.022	0.1768
TRAV2	TRAJ23	0.0111	0.0737	0	0	0.0243	0.0254	0.0283	0.0397	0.0166	0.0144	-0.0165	0.4124
TRAV2	TRAJ24	0	0	0.0335	0.0095	0	0.0254	0.0112	0.0193	0.0116	0.0128	0.0006	0.5
TRAV2	TRAJ26	0	0.0491	0.0753	0.0284	0	0	0.0415	0.0382	0.0095	0.0164	-0.045	0.1768
TRAV2	TRAJ27	0.0223	0.0491	0.0418	0	0.0122	0.0085	0.0377	0.0139	0.0069	0.0063	-0.0435	0.0404
TRAV2	TRAJ28	0.0111	0	0	0.0284	0	0	0.0037	0.0064	0.0095	0.0164	0.0083	0.5
TRAV2	TRAJ30	0.0111	0.0082	0.0586	0.0189	0.0365	0.0423	0.026	0.0283	0.0326	0.0122	0.0093	0.3313
TRAV2	TRAJ31	0.0334	0	0.0167	0.0095	0	0.0423	0.0167	0.0167	0.0173	0.0222	0.0009	0.4124
TRAV2	TRAJ32	0	0.0082	0	0	0.0365	0	0.0027	0.0047	0.0122	0.0211	0.0136	0.5
TRAV2	TRAJ33	0.0223	0	0	0.0095	0	0	0.0074	0.0129	0.0032	0.0055	-0.006	0.5
TRAV2	TRAJ34	0.0111	0.0328	0	0.0189	0.0365	0.0254	0.0146	0.0167	0.0269	0.0089	0.0174	0.1914
TRAV2	TRAJ35	0	0	0	0.0095	0	0.0254	0	0	0.0116	0.0128	0.0166	0.0984
TRAV2	TRAJ39	0.0111	0	0.0167	0.0095	0	0	0.0093	0.0085	0.0032	0.0055	-0.0087	0.1768
TRAV2	TRAJ40	0.0111	0	0	0	0	0	0.0037	0.0064	0	0	-0.0053	0.2525
TRAV2	TRAJ42	0	0	0.0251	0	0	0	0.0084	0.0145	0	0	-0.0121	0.2525
TRAV2	TRAJ43	0	0.0082	0	0	0	0.0169	0.0027	0.0047	0.0056	0.0098	0.0042	0.5
TRAV2	TRAJ48	0	0.0082	0	0	0.0122	0	0.0027	0.0047	0.0041	0.007	0.002	0.5
TRAV2	TRAJ53	0	0	0	0.0095	0	0	0	0	0.0032	0.0055	0.0046	0.2525
TRAV3-3	TRAJ2	0	0	0	0.0095	0.0243	0.0169	0	0	0.0169	0.0074	0.0242	0.0318
TRAV3-1	TRAJ2	0	0.0164	0	0.0095	0	0	0.0055	0.0095	0.0032	0.0055	-0.0033	0.5
TRAV3D-3	TRAJ2	0.0557	0.0328	0.067	0.0095	0	0	0.0518	0.0174	0.0032	0.0055	-0.0683	0.0383
TRAV3-3	TRAJ4	0	0	0	0.0379	0.0243	0.0338	0	0	0.032	0.007	0.0454	0.0318
TRAV3-1	TRAJ4	0	0	0	0.0095	0	0.0169	0	0	0.0088	0.0085	0.0126	0.0984
TRAV3D-3	TRAJ4	0.0891	0.0983	0.1339	0.0473	0.0486	0.0169	0.1071	0.0237	0.0376	0.0179	-0.0935	0.0404
TRAV3-3	TRAJ5	0	0	0	0	0.0122	0.0338	0	0	0.0153	0.0171	0.0219	0.0984
TRAV3-1	TRAJ5	0.0111	0	0	0	0	0	0.0037	0.0064	0	0	-0.0053	0.2525
TRAV3D-3	TRAJ5	0.0557	0.0328	0.1423	0.0284	0.0851	0.0676	0.0769	0.0578	0.0604	0.029	-0.0223	0.5
TRAV3-1	TRAJ6	0.0223	0	0.0167	0.0095	0	0.0085	0.013	0.0116	0.006	0.0052	-0.01	0.2533
TRAV3-3	TRAJ6	0	0.0082	0.067	0	0.0365	0.0085	0.0251	0.0365	0.015	0.0191	-0.0143	0.4124
TRAV3D-3	TRAJ6	0.1337	0.0409	0.1423	0.0284	0.0608	0.0592	0.1056	0.0562	0.0495	0.0183	-0.0751	0.1914
TRAV3-1	TRAJ7	0	0	0	0	0	0.0085	0	0	0.0028	0.0049	0.004	0.2525
TRAV3D-3	TRAJ7	0.0223	0.0246	0.067	0	0	0	0.038	0.0252	0	0	-0.0538	0.0318
TRAV3-3	TRAJ9	0	0	0	0.1041	0	0.0676	0	0	0.0572	0.0528	0.0802	0.0984
TRAV3-1	TRAJ9	0.0446	0.0246	0	0.0284	0	0.0254	0.0231	0.0223	0.0179	0.0156	-0.0074	0.4124
TRAV3D-3	TRAJ9	0.2339	0.1802	0.1088	0.0663	0.0486	0.0254	0.1743	0.0628	0.0468	0.0205	-0.1658	0.0404
TRAV3-3	TRAJ11	0	0.0082	0	0	0.0122	0	0.0027	0.0047	0.0041	0.007	0.002	0.5
TRAV3D-3	TRAJ11	0.0446	0.0409	0.1172	0.0473	0	0.0169	0.0676	0.043	0.0214	0.024	-0.0638	0.1914
TRAV3-3	TRAJ12	0	0	0.0586	0.0473	0.0122	0.0338	0.0195	0.0338	0.0311	0.0177	0.0163	0.329
TRAV3-1	TRAJ12	0.0557	0	0.0418	0.0568	0	0.0423	0.0325	0.029	0.033	0.0295	0.0007	0.4124
TRAV3D-3	TRAJ12	0.2228	0.1474	0.1925	0.1136	0.0365	0.1437	0.1876	0.0379	0.0979	0.0553	-0.1133	0.0404
TRAV3-3	TRAJ13	0	0.0164	0.0418	0.0473	0	0.0845	0.0194	0.0211	0.0439	0.0424	0.0343	0.2533
TRAV3-1	TRAJ13	0.0111	0.1146	0.0251	0	0.0486	0.1183	0.0503	0.0562	0.0556	0.0595	0.0073	0.5
TRAV3D-3	TRAJ13	0.0668	0.0655	0.1088	0.0947	0.0608	0.0338	0.0804	0.0246	0.0631	0.0305	-0.0233	0.1914
TRAV3-3	TRAJ15	0	0.0164	0	0.0663	0.0122	0.0338	0.0055	0.0095	0.0374	0.0272	0.0451	0.092
TRAV3-1	TRAJ15	0.0334	0.0328	0.0167	0.0379	0.0122	0.0085	0.0276	0.0095	0.0195	0.016	-0.0114	0.3313
TRAV3D-3	TRAJ15	0.2005	0.1392	0.2343	0.1231	0.0851	0.1437	0.1913	0.0482	0.1173	0.0297	-0.0925	0.0952
TRAV3D-3	TRAJ16	0.0223	0.0246	0.0251	0.0663	0.0122	0.0507	0.024	0.0015	0.0431	0.0278	0.0267	0.3313
TRAV3-3	TRAJ16	0	0	0	0.0095	0	0.0254	0	0	0.0116	0.0128	0.0166	0.0984
TRAV3-1	TRAJ16	0.0111	0.0164	0.0586	0	0	0.0085	0.0287	0.026	0.0028	0.0049	-0.0368	0.0383
TRAV3-3	TRAJ17	0	0	0.0502	0.0095	0	0.0338	0.0167	0.029	0.0144	0.0174	-0.0033	0.5
TRAV3-1	TRAJ17	0.0334	0	0.0418	0.0189	0	0.0338	0.0251	0.0221	0.0176	0.0169	-0.0106	0.4124
TRAV3D-3	TRAJ17	0.1114	0.1065	0.1507	0.0568	0.0851	0.0592	0.1229	0.0242	0.067	0.0157	-0.0737	0.0404
TRAV3-3	TRAJ18	0.0111	0.0328	0	0.1231	0.2066	0.1437	0.0146	0.0167	0.1578	0.0435	0.1905	0.0404
TRAV3D-3	TRAJ18	0.1003	0.0409	0.1255	0.0947	0.0729	0.1437	0.0889	0.0434	0.1038	0.0363	0.0196	0.5
TRAV3-4	TRAJ18	0	0	0	0.0095	0	0	0	0	0.0032	0.0055	0.0046	0.2525
TRAV3-1	TRAJ18	0.0446	0.0164	0.0335	0	0.0729	0.0169	0.0315	0.0142	0.0299	0.0382	-0.0022	0.5
TRAV3-1	TRAJ21	0.0223	0.0164	0	0.0379	0.0243	0.0338	0.0129	0.0116	0.032	0.007	0.027	0.0404
TRAV3-3	TRAJ21	0.0334	0.0491	0	0.0095	0.0486	0.0761	0.0275	0.0251	0.0447	0.0335	0.024	0.3313
TRAV3-4	TRAJ21	0	0	0	0	0	0.0169	0	0	0.0056	0.0098	0.0081	0.2525
TRAV3D-3	TRAJ21	0.0334	0.0573	0.1758	0.0947	0.0243	0.0592	0.0888	0.0763	0.0594	0.0352	-0.0395	0.5
TRAV3-3	TRAJ22	0.0223	0.0082	0.0837	0.1326	0.1459	0.0592	0.0381	0.0401	0.1126	0.0467	0.1	0.0952
TRAV3-1	TRAJ22	0.0111	0	0.0167	0.0284	0.0243	0.0338	0.0093	0.0085	0.0288	0.0048	0.0276	0.0404
TRAV3D-3	TRAJ22	0.1337	0.1392	0.159	0.0473	0.0608	0.093	0.144	0.0133	0.067	0.0235	-0.1005	0.0404
TRAV3-3	TRAJ23	0.0446	0.1802	0.0251	0.1894	0.389	0.3042	0.0833	0.0845	0.2942	0.1002	0.2566	0.0404
TRAV3-1	TRAJ23	0.1003	0.0082	0.0167	0.1041	0.0243	0.0338	0.0417	0.0509	0.0541	0.0436	0.0171	0.1914
TRAV3-4	TRAJ23	0.0111	0.0246	0	0	0	0	0.0119	0.0123	0	0	-0.0171	0.0984
TRAV3D-3	TRAJ23	0.1894	0.131	0.4603	0.2367	0.158	0.3211	0.2602	0.1757	0.2386	0.0816	-0.0249	0.5
TRAV3-3	TRAJ24	0.0111	0.0164	0	0.0568	0.0486	0.0254	0.0092	0.0084	0.0436	0.0163	0.0484	0.0404
TRAV3D-3	TRAJ24	0.0446	0.0082	0	0.0284	0	0.0085	0.0176	0.0237	0.0123	0.0146	-0.0075	0.4124
TRAV3-4	TRAJ24	0	0.0082	0.0084	0	0	0	0.0055	0.0048	0	0	-0.0079	0.0984
TRAV3-1	TRAJ24	0.0111	0.0246	0	0	0	0	0.0119	0.0123	0	0	-0.0171	0.0984
TRAV3-3	TRAJ26	0.1114	0.0901	0.0084	0.142	0.158	0.3127	0.07	0.0544	0.2042	0.0943	0.1705	0.0404
TRAV3-1	TRAJ26	0.0111	0.0491	0.0251	0.0663	0.0851	0.0423	0.0284	0.0192	0.0646	0.0215	0.0499	0.0952
TRAV3D-3	TRAJ26	0.1003	0.0491	0.1339	0.0947	0.0972	0.1099	0.0944	0.0427	0.1006	0.0082	0.0082	0.5
TRAV3-4	TRAJ26	0	0	0.0921	0.0095	0	0.0085	0.0307	0.0532	0.006	0.0052	-0.035	0.5
TRAV3-3	TRAJ27	0.1003	0.0409	0.0418	0.1894	0.1459	0.262	0.061	0.034	0.1991	0.0587	0.1765	0.0404
TRAV3-4	TRAJ27	0.0111	0	0	0	0	0	0.0037	0.0064	0	0	-0.0053	0.2525
TRAV3-1	TRAJ27	0.078	0.0164	0.0084	0.0189	0.0365	0.0169	0.0343	0.0381	0.0241	0.0108	-0.0143	0.3313
TRAV3D-3	TRAJ27	0.1114	0.0737	0.226	0.0663	0.0729	0.1014	0.137	0.0793	0.0802	0.0187	-0.0739	0.0952
TRAV3-3	TRAJ28	0	0.0082	0	0.0189	0.0243	0.0761	0.0027	0.0047	0.0398	0.0316	0.0524	0.0383
TRAV3-1	TRAJ28	0.0111	0	0	0.0095	0.0243	0	0.0037	0.0064	0.0113	0.0122	0.0109	0.3214
TRAV3D-3	TRAJ28	0.0891	0.0246	0	0.0284	0.0243	0	0.0379	0.046	0.0176	0.0154	-0.0285	0.4124
TRAV3-3	TRAJ30	0.078	0.0655	0.0251	0.0568	0.1337	0.1099	0.0562	0.0276	0.1001	0.0394	0.0588	0.1914
TRAV3-1	TRAJ30	0.0446	0.0082	0.0167	0.0757	0.0486	0.0169	0.0232	0.019	0.0471	0.0294	0.0333	0.0952
TRAV3-4	TRAJ30	0.0111	0	0	0.0189	0	0	0.0037	0.0064	0.0063	0.0109	0.0037	0.5
TRAV3D-3	TRAJ30	0.156	0.0737	0.067	0.0947	0.0972	0.0507	0.0989	0.0496	0.0809	0.0262	-0.0238	0.5
TRAV3-3	TRAJ31	0.1003	0.1474	0.0335	0.3124	0.1702	0.1014	0.0937	0.0572	0.1947	0.1076	0.1274	0.0952
TRAV3-1	TRAJ31	0.0223	0.0082	0	0.1136	0.0729	0.0338	0.0102	0.0113	0.0734	0.0399	0.0875	0.0404
TRAV3-4	TRAJ31	0	0	0.0418	0.0284	0.0122	0.0085	0.0139	0.0241	0.0164	0.0106	0.0036	0.329
TRAV3D-3	TRAJ31	0.156	0.0901	0.1841	0.1041	0.0972	0.1775	0.1434	0.0483	0.1263	0.0445	-0.0217	0.5
TRAV3-1	TRAJ32	0	0.0328	0	0.0189	0.0608	0.0423	0.0109	0.0189	0.0407	0.021	0.0419	0.092
TRAV3-4	TRAJ32	0.0223	0	0	0.0095	0	0	0.0074	0.0129	0.0032	0.0055	-0.006	0.5
TRAV3-3	TRAJ32	0.0668	0.1883	0.0921	0.1041	0.0972	0.1014	0.1157	0.0641	0.1009	0.0035	-0.0193	0.3313
TRAV3D-3	TRAJ32	0.1003	0.0491	0.1255	0.0663	0.0365	0.0507	0.0916	0.0389	0.0512	0.0149	-0.0544	0.1914
TRAV3D-3	TRAJ33	0.0111	0.0328	0	0.0663	0.0365	0.093	0.0146	0.0167	0.0653	0.0283	0.0703	0.0404
TRAV3-1	TRAJ33	0	0.0573	0	0.0757	0.0243	0.0338	0.0191	0.0331	0.0446	0.0273	0.0357	0.1879
TRAV3-3	TRAJ33	0.0557	0.0082	0.0921	0.0379	0.0729	0.0676	0.052	0.0421	0.0595	0.0189	0.0102	0.5
TRAV3-4	TRAJ33	0.0111	0	0	0	0	0	0.0037	0.0064	0	0	-0.0053	0.2525
TRAV3-3	TRAJ34	0.0668	0.0573	0.0586	0.142	0.0972	0.0423	0.0609	0.0052	0.0938	0.0499	0.0441	0.3313
TRAV3-1	TRAJ34	0.0668	0	0.0335	0.0284	0.0122	0.0423	0.0334	0.0334	0.0276	0.0151	-0.0081	0.5
TRAV3-4	TRAJ34	0.0557	0	0	0.0189	0	0	0.0186	0.0322	0.0063	0.0109	-0.0175	0.5
TRAV3D-3	TRAJ34	0.0446	0.0328	0.0753	0.0757	0.0243	0	0.0509	0.0219	0.0333	0.0387	-0.0244	0.3313
TRAV3-3	TRAJ35	0.0111	0.0082	0	0.0663	0.0608	0.0761	0.0064	0.0058	0.0677	0.0078	0.0853	0.0404
TRAV3-1	TRAJ35	0	0	0	0.0473	0.0122	0.0507	0	0	0.0367	0.0213	0.052	0.0318
TRAV3D-3	TRAJ35	0	0.0082	0.0335	0.0189	0.0486	0.0761	0.0139	0.0175	0.0479	0.0286	0.0476	0.0952
TRAV3-1	TRAJ37	0.0111	0	0	0.0473	0.0243	0.0423	0.0037	0.0064	0.038	0.0121	0.0485	0.0383
TRAV3-4	TRAJ37	0.0111	0	0	0	0	0	0.0037	0.0064	0	0	-0.0053	0.2525
TRAV3D-3	TRAJ37	0.1003	0.0983	0.0586	0.0757	0.0486	0.0507	0.0857	0.0235	0.0583	0.0151	-0.0369	0.0952
TRAV3-3	TRAJ37	0.1782	0.1883	0.1004	0.1231	0.1216	0.1014	0.1556	0.0481	0.1154	0.0121	-0.0511	0.3313
TRAV3-1	TRAJ38	0	0	0	0.0379	0.0122	0	0	0	0.0167	0.0193	0.0239	0.0984
TRAV3-3	TRAJ38	0.0111	0.0246	0	0.0379	0.0365	0	0.0119	0.0123	0.0248	0.0215	0.0183	0.2533
TRAV3D-3	TRAJ38	0	0	0	0	0	0.0338	0	0	0.0113	0.0195	0.0162	0.2525
TRAV3-4	TRAJ38	0	0.0246	0	0	0	0	0.0082	0.0142	0	0	-0.0118	0.2525
TRAV3-3	TRAJ39	0.0668	0.0164	0.067	0.1041	0.1094	0.1014	0.0501	0.0292	0.105	0.0041	0.0735	0.0404
TRAV3-1	TRAJ39	0.0111	0.0164	0.0167	0.0379	0.0365	0.0676	0.0147	0.0032	0.0473	0.0176	0.0456	0.0404
TRAV3D-3	TRAJ39	0.0334	0.0164	0	0.0473	0.0122	0.0338	0.0166	0.0167	0.0311	0.0177	0.0204	0.1914
TRAV3-4	TRAJ39	0.0111	0	0.0251	0	0	0.0085	0.0121	0.0126	0.0028	0.0049	-0.0133	0.1768
TRAV3-3	TRAJ40	0.0668	0.0655	0.1339	0.2083	0.1094	0.1606	0.0887	0.0391	0.1594	0.0495	0.0908	0.0952
TRAV3-1	TRAJ40	0.0334	0.0328	0.0084	0.0284	0.0486	0.0507	0.0249	0.0143	0.0426	0.0123	0.0247	0.1914
TRAV3-4	TRAJ40	0.0223	0.0082	0.0084	0.0095	0	0	0.013	0.0081	0.0032	0.0055	-0.014	0.1879
TRAV3D-3	TRAJ40	0.0668	0.0328	0.0335	0.0189	0.0365	0.0338	0.0444	0.0194	0.0297	0.0095	-0.0205	0.5
TRAV3-1	TRAJ42	0	0.0164	0	0.0757	0.0365	0.0169	0.0055	0.0095	0.043	0.0299	0.0528	0.0383
TRAV3D-3	TRAJ42	0	0	0.0251	0.0189	0	0.0507	0.0084	0.0145	0.0232	0.0256	0.021	0.3214
TRAV3-4	TRAJ42	0	0	0	0.0095	0	0	0	0	0.0032	0.0055	0.0046	0.2525
TRAV3-3	TRAJ42	0.1337	0.0409	0.0418	0.0947	0.0365	0.0845	0.0721	0.0533	0.0719	0.0311	-0.0003	0.5
TRAV3D-3	TRAJ43	0.0223	0.0082	0	0	0.0243	0.0592	0.0102	0.0113	0.0278	0.0298	0.0249	0.2533
TRAV3-1	TRAJ43	0	0.0328	0.0167	0.0189	0.0365	0	0.0165	0.0164	0.0185	0.0183	0.0028	0.4124
TRAV3-3	TRAJ43	0.0668	0.0491	0.0921	0.0568	0.0851	0.0592	0.0693	0.0216	0.067	0.0157	-0.0031	0.5
TRAV3-3	TRAJ44	0	0	0.0167	0	0	0	0.0056	0.0096	0	0	-0.0081	0.2525
TRAV3-3	TRAJ45	0.0111	0.0082	0.0921	0.0473	0.0608	0.1437	0.0371	0.0476	0.0839	0.0522	0.0637	0.1914
TRAV3-1	TRAJ45	0	0	0	0.0473	0.0122	0.0423	0	0	0.0339	0.019	0.0481	0.0318
TRAV3D-3	TRAJ45	0	0	0	0.0095	0.0122	0.0085	0	0	0.0101	0.0019	0.0145	0.0318
TRAV3-4	TRAJ45	0	0	0.0084	0	0	0	0.0028	0.0048	0	0	-0.004	0.2525
TRAV3-3	TRAJ48	0.0334	0.0328	0.0251	0.1988	0.0486	0.1437	0.0304	0.0046	0.1304	0.076	0.1336	0.0404
TRAV3-1	TRAJ48	0	0.0328	0	0.0379	0.0486	0.0676	0.0109	0.0189	0.0514	0.015	0.0567	0.0383
TRAV3-4	TRAJ48	0.0334	0	0	0.0095	0.0608	0	0.0111	0.0193	0.0234	0.0327	0.0174	0.3214
TRAV3D-3	TRAJ48	0.0111	0	0	0.0189	0.0243	0	0.0037	0.0064	0.0144	0.0128	0.0153	0.1768
TRAV3-3	TRAJ49	0.1225	0.0901	0.1925	0.2178	0.1823	0.2028	0.135	0.0523	0.201	0.0178	0.0815	0.0952
TRAV3-1	TRAJ49	0.0111	0	0	0.0568	0	0.0507	0.0037	0.0064	0.0358	0.0312	0.0454	0.1768
TRAV3-4	TRAJ49	0	0	0	0	0	0.0169	0	0	0.0056	0.0098	0.0081	0.2525
TRAV3D-3	TRAJ49	0	0.0328	0.0167	0.0189	0.0122	0.0254	0.0165	0.0164	0.0188	0.0066	0.0033	0.5
TRAV3-1	TRAJ50	0	0.0082	0	0.0473	0.0243	0.0423	0.0027	0.0047	0.038	0.0121	0.0499	0.0383
TRAV3-4	TRAJ50	0.0111	0	0	0	0	0	0.0037	0.0064	0	0	-0.0053	0.2525
TRAV3-3	TRAJ50	0.0223	0.0246	0.0418	0.0473	0.0122	0.0169	0.0296	0.0107	0.0255	0.0191	-0.0058	0.3313
TRAV3D-3	TRAJ50	0	0	0.0251	0	0	0.0085	0.0084	0.0145	0.0028	0.0049	-0.008	0.5
TRAV3-1	TRAJ52	0	0.0082	0	0.0379	0.0365	0.0423	0.0027	0.0047	0.0389	0.003	0.0512	0.0383
TRAV3-3	TRAJ52	0.0557	0.0655	0.067	0.0757	0.0851	0.0423	0.0627	0.0061	0.0677	0.0225	0.0068	0.3313
TRAV3-4	TRAJ52	0.0111	0.0082	0.0084	0.0189	0	0	0.0092	0.0016	0.0063	0.0109	-0.0042	0.329
TRAV3-1	TRAJ53	0	0	0	0.0284	0.0365	0.0338	0	0	0.0329	0.0041	0.0467	0.0318
TRAV3-4	TRAJ53	0.0111	0.0082	0	0	0	0	0.0064	0.0058	0	0	-0.0092	0.0984
TRAV3-3	TRAJ53	0.0223	0.0491	0.0921	0.0284	0.0608	0.0085	0.0545	0.0352	0.0326	0.0264	-0.0303	0.3313
TRAV3-1	TRAJ56	0	0.0082	0	0.0757	0.0122	0.0254	0.0027	0.0047	0.0378	0.0335	0.0496	0.0383
TRAV3-3	TRAJ56	0.0223	0.0246	0.0084	0	0	0.0169	0.0184	0.0088	0.0056	0.0098	-0.0182	0.092
TRAV3-4	TRAJ56	0.0334	0.0164	0.0084	0	0	0	0.0194	0.0128	0	0	-0.0277	0.0318
TRAV3-1	TRAJ57	0	0	0	0.0568	0	0.0254	0	0	0.0274	0.0285	0.039	0.0984
TRAV3D-3	TRAJ57	0	0	0	0	0	0.0254	0	0	0.0085	0.0147	0.0122	0.2525
TRAV3-4	TRAJ57	0	0	0	0.0189	0	0	0	0	0.0063	0.0109	0.0091	0.2525
TRAV3-3	TRAJ57	0.0111	0.0246	0.0335	0	0	0.0085	0.0231	0.0113	0.0028	0.0049	-0.0289	0.0383
TRAV3-1	TRAJ58	0	0.0082	0	0.0095	0.0486	0.0338	0.0027	0.0047	0.0306	0.0197	0.0396	0.0383
TRAV3-3	TRAJ58	0	0	0	0.0095	0	0	0	0	0.0032	0.0055	0.0046	0.2525
TRAV3-4	TRAJ58	0.0223	0.0164	0	0	0.0122	0.0085	0.0129	0.0116	0.0069	0.0063	-0.0086	0.2533
TRAV4D-3	TRAJ2	0.0111	0.0328	0	0.0189	0.0365	0.0254	0.0146	0.0167	0.0269	0.0089	0.0174	0.1914
TRAV4-2	TRAJ2	0.0111	0	0	0.0095	0.0122	0	0.0037	0.0064	0.0072	0.0064	0.005	0.3214
TRAV4N-3	TRAJ2	0.0223	0.0082	0.0418	0	0	0	0.0241	0.0169	0	0	-0.0344	0.0318
TRAV4D-4	TRAJ2	0.1003	0.0082	0.1339	0	0	0.0254	0.0808	0.0651	0.0085	0.0147	-0.0999	0.092
TRAV4D-3	TRAJ4	0.0111	0	0	0.0947	0.1459	0.0676	0.0037	0.0064	0.1027	0.0398	0.1357	0.0383
TRAV4-2	TRAJ4	0	0	0	0.0095	0.0122	0.0338	0	0	0.0185	0.0133	0.0264	0.0318
TRAV4N-3	TRAJ4	0.0334	0	0.0921	0.0284	0	0.0085	0.0418	0.0466	0.0123	0.0146	-0.0414	0.2533
TRAV4D-4	TRAJ4	0.2562	0.0573	0.2427	0.0473	0.0486	0.0507	0.1854	0.1111	0.0489	0.0017	-0.1765	0.0404
TRAV4D-3	TRAJ5	0	0.0082	0	0	0.0486	0.0085	0.0027	0.0047	0.019	0.026	0.0233	0.1768
TRAV4N-3	TRAJ5	0	0.0246	0	0	0.0122	0	0.0082	0.0142	0.0041	0.007	-0.0059	0.5
TRAV4D-4	TRAJ5	0.0223	0.0328	0.0167	0	0	0	0.0239	0.0082	0	0	-0.0341	0.0318
TRAV4-2	TRAJ6	0	0.0164	0.0335	0.0095	0.0486	0.0254	0.0166	0.0168	0.0278	0.0197	0.0158	0.3313
TRAV4D-3	TRAJ6	0.0111	0.0164	0	0.0568	0	0	0.0092	0.0084	0.0189	0.0328	0.0138	0.5
TRAV4N-3	TRAJ6	0.0111	0.0491	0.0167	0.0189	0.0122	0	0.0256	0.0205	0.0104	0.0096	-0.0215	0.3313
TRAV4D-4	TRAJ6	0.1448	0.1883	0.3432	0.0947	0.0122	0.0085	0.2254	0.1043	0.0385	0.0487	-0.2388	0.0404
TRAV4D-4	TRAJ7	0	0	0	0.0189	0	0	0	0	0.0063	0.0109	0.0091	0.2525
TRAV4D-3	TRAJ9	0.0223	0.1065	0.0586	0.142	0.2066	0.1859	0.0625	0.0422	0.1782	0.033	0.1491	0.0404
TRAV4-2	TRAJ9	0.0111	0.0328	0	0.0284	0.0972	0.093	0.0146	0.0167	0.0729	0.0386	0.0806	0.0952
TRAV4N-3	TRAJ9	0.0334	0	0.0753	0.0189	0	0.0085	0.0362	0.0377	0.0091	0.0095	-0.0382	0.2533
TRAV4D-4	TRAJ9	0.2896	0.2948	0.544	0.2462	0.0365	0.0507	0.3761	0.1454	0.1111	0.1172	-0.3086	0.0404
TRAV4-2	TRAJ11	0	0	0	0.0568	0.0365	0.1183	0	0	0.0705	0.0426	0.0983	0.0318
TRAV4D-3	TRAJ11	0	0.0164	0	0.0189	0.0851	0.0254	0.0055	0.0095	0.0431	0.0365	0.053	0.0383
TRAV4N-3	TRAJ11	0	0	0.0251	0	0	0.0085	0.0084	0.0145	0.0028	0.0049	-0.008	0.5
TRAV4D-4	TRAJ11	0.156	0.1065	0.1507	0.0568	0.0608	0.0676	0.1377	0.0272	0.0617	0.0055	-0.0997	0.0404
TRAV4D-3	TRAJ12	0.0557	0.0246	0	0.1231	0.2674	0.2197	0.0268	0.0279	0.2034	0.0735	0.229	0.0404
TRAV4-2	TRAJ12	0	0.0819	0.0251	0.1799	0.0972	0.1775	0.0357	0.042	0.1515	0.0471	0.1529	0.0404
TRAV4N-3	TRAJ12	0.1114	0.1802	0.1674	0.0379	0.0243	0.0085	0.153	0.0366	0.0236	0.0147	-0.1717	0.0404
TRAV4D-4	TRAJ12	0.7909	0.8352	0.8621	0.1041	0.2066	0.0676	0.8294	0.036	0.1261	0.0721	-0.7	0.0404
TRAV4D-3	TRAJ13	0.0223	0.0491	0.1004	0.1326	0.2188	0.169	0.0573	0.0397	0.1735	0.0433	0.1504	0.0404
TRAV4-2	TRAJ13	0.0111	0.0246	0.0251	0.1704	0.1459	0.0338	0.0203	0.0079	0.1167	0.0728	0.1302	0.0404
TRAV4N-3	TRAJ13	0.0557	0.0328	0.0502	0.0284	0	0	0.0462	0.012	0.0095	0.0164	-0.0515	0.0383
TRAV4D-4	TRAJ13	0.078	0.0409	0.2176	0.0663	0.0243	0.0592	0.1122	0.0932	0.0499	0.0225	-0.0832	0.1914
TRAV4-2	TRAJ15	0.0334	0.0409	0.1004	0.0379	0.0729	0.2197	0.0582	0.0367	0.1102	0.0965	0.0692	0.3313
TRAV4D-3	TRAJ15	0.0446	0.0491	0.0418	0.0947	0.0729	0.0507	0.0452	0.0037	0.0728	0.022	0.0376	0.0404
TRAV4N-3	TRAJ15	0.0223	0	0.0753	0	0	0	0.0325	0.0387	0	0	-0.0461	0.0984
TRAV4D-4	TRAJ15	0.2562	0.4258	0.318	0.0568	0.158	0.0761	0.3333	0.0858	0.097	0.0537	-0.2814	0.0404
TRAV4D-3	TRAJ16	0	0.0164	0.0418	0.0663	0.1459	0	0.0194	0.0211	0.0707	0.0731	0.0708	0.2533
TRAV4D-2	TRAJ16	0	0	0	0.0095	0.0243	0	0	0	0.0113	0.0122	0.0162	0.0984
TRAV4-2	TRAJ16	0.0111	0	0	0.0189	0	0.0254	0.0037	0.0064	0.0148	0.0132	0.0159	0.1768
TRAV4N-3	TRAJ16	0.0223	0.0246	0.0084	0.0095	0	0	0.0184	0.0088	0.0032	0.0055	-0.0217	0.092
TRAV4D-4	TRAJ16	0.1671	0.131	0.1255	0.1136	0.0122	0.0423	0.1412	0.0226	0.056	0.0521	-0.1119	0.0404
TRAV4D-3	TRAJ17	0.0111	0.0491	0	0.0947	0.0851	0.1521	0.0201	0.0257	0.1106	0.0362	0.1226	0.0404
TRAV4-2	TRAJ17	0.0557	0.0901	0.0586	0.0947	0.2066	0.093	0.0681	0.0191	0.1314	0.0651	0.0831	0.0404
TRAV4-3	TRAJ17	0	0	0	0	0	0.0085	0	0	0.0028	0.0049	0.004	0.2525
TRAV4D-2	TRAJ17	0	0	0.0251	0	0	0	0.0084	0.0145	0	0	-0.0121	0.2525
TRAV4N-3	TRAJ17	0.0557	0.0246	0.0502	0.0284	0	0.0085	0.0435	0.0166	0.0123	0.0146	-0.0438	0.0952
TRAV4D-4	TRAJ17	0.2005	0.303	0.2343	0.0757	0.0851	0.0423	0.2459	0.0522	0.0677	0.0225	-0.2227	0.0404
TRAV4D-3	TRAJ18	0.0223	0.1556	0.0335	0.1894	0.2309	0.2704	0.0705	0.0739	0.2302	0.0405	0.2006	0.0404
TRAV4-2	TRAJ18	0.0668	0.0246	0.0586	0.0284	0.1459	0.1521	0.05	0.0224	0.1088	0.0697	0.0786	0.1914
TRAV4N-3	TRAJ18	0.1003	0.0573	0.0251	0.0095	0.0122	0.0085	0.0609	0.0377	0.0101	0.0019	-0.0708	0.0404
TRAV4D-4	TRAJ18	0.2562	0.2457	0.318	0.1041	0.0608	0	0.2733	0.0391	0.055	0.0523	-0.2713	0.0404
TRAV4D-3	TRAJ21	0.0557	0.0409	0.1758	0.2367	0.3282	0.3465	0.0908	0.074	0.3038	0.0588	0.2573	0.0404
TRAV4-2	TRAJ21	0.0111	0.0655	0.0084	0.0568	0.2796	0.2113	0.0283	0.0322	0.1826	0.1141	0.2017	0.0952
TRAV4N-3	TRAJ21	0.078	0.0409	0.1255	0.0284	0.0122	0.0085	0.0815	0.0424	0.0164	0.0106	-0.0896	0.0404
TRAV4D-4	TRAJ21	0.3787	0.2047	0.5859	0.161	0.0486	0.0507	0.3898	0.1908	0.0868	0.0643	-0.3548	0.0404
TRAV4-2	TRAJ22	0.0668	0.0246	0.067	0.0284	0.158	0.2028	0.0528	0.0244	0.1297	0.0906	0.1017	0.1914
TRAV4D-3	TRAJ22	0.0891	0.172	0.0502	0.1515	0.158	0.1606	0.1038	0.0622	0.1567	0.0047	0.0675	0.3313
TRAV4N-3	TRAJ22	0.0668	0.0409	0.1758	0.0189	0	0.0085	0.0945	0.0716	0.0091	0.0095	-0.1172	0.0404
TRAV4D-4	TRAJ22	0.479	0.4831	0.8704	0.1041	0.0729	0.0845	0.6108	0.2248	0.0872	0.0158	-0.5672	0.0404
TRAV4D-3	TRAJ23	0.0446	0.0573	0	0.1988	0.1945	0.1437	0.034	0.0301	0.179	0.0306	0.1893	0.0404
TRAV4-2	TRAJ23	0.0111	0.0164	0.0335	0.1799	0.1216	0.1859	0.0203	0.0117	0.1625	0.0355	0.1882	0.0404
TRAV4D-2	TRAJ23	0	0.0082	0	0	0	0	0.0027	0.0047	0	0	-0.0039	0.2525
TRAV4N-3	TRAJ23	0.078	0.0655	0.0251	0.0095	0	0	0.0562	0.0276	0.0032	0.0055	-0.0743	0.0383
TRAV4D-4	TRAJ23	0.2562	0.3767	0.4436	0.0663	0.0729	0.093	0.3588	0.095	0.0774	0.0139	-0.3348	0.0404
TRAV4D-3	TRAJ24	0.0223	0.0082	0	0.0663	0.1337	0.093	0.0102	0.0113	0.0977	0.0339	0.1198	0.0404
TRAV4-2	TRAJ24	0	0	0.0335	0.0379	0.0608	0.0085	0.0112	0.0193	0.0357	0.0262	0.0345	0.092
TRAV4N-3	TRAJ24	0	0.0491	0	0.0284	0	0	0.0164	0.0283	0.0095	0.0164	-0.0098	0.5
TRAV4D-4	TRAJ24	0.0557	0.0737	0.0084	0.0663	0	0.0423	0.0459	0.0337	0.0362	0.0336	-0.0134	0.3313
TRAV4D-3	TRAJ26	0.0446	0.0491	0.1255	0.1231	0.2917	0.2028	0.0731	0.0455	0.2059	0.0843	0.1683	0.0952
TRAV4-2	TRAJ26	0.0334	0.0164	0	0.0379	0.1337	0.2451	0.0166	0.0167	0.1389	0.1037	0.1639	0.0404
TRAV4N-3	TRAJ26	0.0111	0	0.0251	0.0284	0	0.0085	0.0121	0.0126	0.0123	0.0146	0.0003	0.4124
TRAV4D-4	TRAJ26	0.1782	0.131	0.3264	0	0.0729	0.0507	0.2119	0.102	0.0412	0.0374	-0.219	0.0404
TRAV4D-3	TRAJ27	0.1114	0.1474	0.1004	0.303	0.4254	0.5408	0.1197	0.0246	0.4231	0.1189	0.3459	0.0404
TRAV4-2	TRAJ27	0.0557	0.0491	0	0.0663	0.1337	0.1521	0.0349	0.0304	0.1174	0.0452	0.1107	0.0404
TRAV4N-3	TRAJ27	0.0223	0.0819	0	0.0189	0.0122	0	0.0347	0.0423	0.0104	0.0096	-0.0343	0.2533
TRAV4D-4	TRAJ27	0.4122	0.2293	0.2762	0.1799	0.2188	0.0676	0.3059	0.095	0.1554	0.0785	-0.1767	0.0404
TRAV4-2	TRAJ28	0	0.0164	0.0418	0.0379	0.0608	0.0338	0.0194	0.0211	0.0442	0.0146	0.0347	0.1914
TRAV4D-3	TRAJ28	0	0.0737	0.0251	0.0095	0.0486	0	0.0329	0.0375	0.0194	0.0258	-0.019	0.4124
TRAV4D-4	TRAJ28	0.0334	0.0328	0.0502	0.0284	0.0122	0.0085	0.0388	0.0099	0.0164	0.0106	-0.0314	0.0404
TRAV4D-3	TRAJ30	0.0668	0.0573	0.0753	0.0852	0.2674	0.3634	0.0665	0.009	0.2387	0.1413	0.2159	0.0404
TRAV4-2	TRAJ30	0.0223	0.0737	0.0753	0.1326	0.158	0.169	0.0571	0.0301	0.1532	0.0187	0.1255	0.0404
TRAV4D-2	TRAJ30	0	0	0	0	0.0365	0	0	0	0.0122	0.0211	0.0175	0.2525
TRAV4N-3	TRAJ30	0.0334	0.0246	0.0251	0.0189	0	0	0.0277	0.0049	0.0063	0.0109	-0.0304	0.0383
TRAV4D-4	TRAJ30	0.2673	0.4668	0.4017	0.1136	0.1459	0.0761	0.3786	0.1017	0.1119	0.0349	-0.3102	0.0404
TRAV4-2	TRAJ31	0.0223	0.1228	0.1004	0.1515	0.3768	0.507	0.0818	0.0528	0.3451	0.1799	0.3143	0.0404
TRAV4D-3	TRAJ31	0.0891	0.1065	0.0418	0.1988	0.316	0.1775	0.0791	0.0335	0.2308	0.0746	0.1898	0.0404
TRAV4D-2	TRAJ31	0	0.0082	0	0.0095	0.0365	0	0.0027	0.0047	0.0153	0.0189	0.018	0.1768
TRAV4N-3	TRAJ31	0.0111	0	0.0251	0.0663	0	0	0.0121	0.0126	0.0221	0.0383	0.0142	0.5
TRAV4-4/DV10	TRAJ31	0.0111	0	0	0	0	0	0.0037	0.0064	0	0	-0.0053	0.2525
TRAV4D-4	TRAJ31	0.4344	0.434	0.5022	0.1326	0.0486	0.0507	0.4569	0.0393	0.0773	0.0479	-0.4355	0.0404
TRAV4-2	TRAJ32	0.0111	0.0409	0.0335	0.1988	0.2674	0.169	0.0285	0.0155	0.2117	0.0505	0.2365	0.0404
TRAV4D-3	TRAJ32	0.1448	0.0573	0.0418	0.1515	0.1702	0.1268	0.0813	0.0555	0.1495	0.0218	0.0882	0.0952
TRAV4D-4	TRAJ32	0.1671	0.0737	0.0586	0.0947	0.0365	0.0592	0.0998	0.0588	0.0635	0.0293	-0.0484	0.3313
TRAV4-2	TRAJ33	0.0111	0	0.0586	0.0757	0.1216	0.1521	0.0232	0.0311	0.1165	0.0385	0.1259	0.0404
TRAV4D-3	TRAJ33	0.0891	0.1065	0.1255	0.1515	0.0365	0.2451	0.107	0.0182	0.1444	0.1045	0.0479	0.3313
TRAV4N-3	TRAJ33	0.0334	0	0	0.0095	0	0	0.0111	0.0193	0.0032	0.0055	-0.0113	0.5
TRAV4D-4	TRAJ33	0.3899	0.3357	0.5524	0.0757	0.0122	0.0676	0.426	0.1128	0.0518	0.0346	-0.4391	0.0404
TRAV4D-3	TRAJ34	0.0891	0.0901	0.067	0.2556	0.158	0.1606	0.0821	0.0131	0.1914	0.0556	0.1388	0.0404
TRAV4-2	TRAJ34	0.0557	0.0328	0	0.0568	0.1094	0.1099	0.0295	0.028	0.092	0.0305	0.085	0.0404
TRAV4-3	TRAJ34	0	0.0164	0	0	0	0	0.0055	0.0095	0	0	-0.0079	0.2525
TRAV4N-3	TRAJ34	0.0111	0	0.0586	0.0379	0	0	0.0232	0.0311	0.0126	0.0219	-0.015	0.3214
TRAV4D-4	TRAJ34	0.2785	0.2293	0.4101	0.2083	0.0122	0.093	0.306	0.0935	0.1045	0.0986	-0.2418	0.0404
TRAV4-2	TRAJ35	0	0	0	0	0.0729	0.1099	0	0	0.0609	0.0559	0.0853	0.0984
TRAV4D-3	TRAJ35	0.0334	0.0246	0.0586	0.1136	0.0729	0.0507	0.0389	0.0176	0.0791	0.0319	0.0548	0.0952
TRAV4D-4	TRAJ35	0.0334	0.131	0.0251	0.0473	0.0608	0.0085	0.0632	0.0589	0.0389	0.0272	-0.0334	0.5
TRAV4D-3	TRAJ37	0.0668	0.0737	0.159	0.1894	0.1216	0.1352	0.0998	0.0514	0.1487	0.0359	0.0628	0.1914
TRAV4D-2	TRAJ37	0	0.0082	0	0	0.0365	0.0254	0.0027	0.0047	0.0206	0.0187	0.0255	0.1768
TRAV4-2	TRAJ37	0.0557	0.0573	0.0418	0.0095	0.0243	0.1268	0.0516	0.0085	0.0535	0.0639	0.0026	0.3313
TRAV4N-3	TRAJ37	0.0446	0.0246	0.0251	0	0	0.0085	0.0314	0.0114	0.0028	0.0049	-0.0406	0.0383
TRAV4D-4	TRAJ37	0.401	0.5159	0.4352	0.2083	0.1094	0.0338	0.4507	0.059	0.1172	0.0875	-0.3769	0.0404
TRAV4-2	TRAJ38	0	0.0082	0	0.0663	0.0486	0.093	0.0027	0.0047	0.0693	0.0224	0.0928	0.0383
TRAV4D-3	TRAJ38	0.0223	0.0246	0	0.0473	0.0729	0	0.0156	0.0136	0.0401	0.037	0.0344	0.2533
TRAV4D-4	TRAJ38	0.156	0.0573	0	0.0947	0.0486	0.0676	0.0711	0.0789	0.0703	0.0232	-0.0011	0.5
TRAV4D-2	TRAJ38	0	0	0.0251	0	0	0	0.0084	0.0145	0	0	-0.0121	0.2525
TRAV4-2	TRAJ39	0.0223	0.0164	0.0418	0.0757	0.1459	0.1183	0.0268	0.0133	0.1133	0.0354	0.1167	0.0404
TRAV4D-3	TRAJ39	0.1003	0.0737	0.0251	0.1041	0.158	0.0761	0.0664	0.0381	0.1127	0.0416	0.0613	0.0952
TRAV4N-3	TRAJ39	0	0	0	0.0095	0	0	0	0	0.0032	0.0055	0.0046	0.2525
TRAV4D-4	TRAJ39	0.1337	0.2129	0.2176	0.1041	0.0243	0.0254	0.1881	0.0471	0.0513	0.0458	-0.1765	0.0404
TRAV4-2	TRAJ40	0.0223	0.0246	0.0335	0.0757	0.1945	0.2197	0.0268	0.0059	0.1633	0.0769	0.1801	0.0404
TRAV4D-3	TRAJ40	0.1114	0.0819	0.0921	0.1136	0.2553	0.338	0.0951	0.015	0.2356	0.1135	0.1741	0.0404
TRAV4D-2	TRAJ40	0	0	0	0	0	0.0254	0	0	0.0085	0.0147	0.0122	0.2525
TRAV4N-3	TRAJ40	0	0	0.0167	0	0	0	0.0056	0.0096	0	0	-0.0081	0.2525
TRAV4D-4	TRAJ40	0.3453	0.2211	0.2762	0.0568	0.0243	0.0592	0.2809	0.0622	0.0468	0.0195	-0.2912	0.0404
TRAV4-2	TRAJ42	0.0223	0	0	0.0473	0.0729	0.1014	0.0074	0.0129	0.0739	0.0271	0.0922	0.0383
TRAV4N-3	TRAJ42	0.0111	0	0	0	0	0	0.0037	0.0064	0	0	-0.0053	0.2525
TRAV4D-3	TRAJ42	0.0557	0.0737	0.1004	0.0379	0.0851	0.0592	0.0766	0.0225	0.0607	0.0236	-0.0215	0.3313
TRAV4D-4	TRAJ42	0.1225	0.1392	0.2176	0.0757	0.0122	0.0085	0.1598	0.0508	0.0321	0.0378	-0.1683	0.0404
TRAV4-2	TRAJ43	0.0111	0.0082	0.0251	0.0284	0.1823	0.093	0.0148	0.009	0.1012	0.0773	0.1179	0.0404
TRAV4D-3	TRAJ43	0.0446	0.1474	0.0418	0.1231	0.0608	0.1352	0.0779	0.0602	0.1064	0.0399	0.0376	0.3313
TRAV4N-3	TRAJ43	0.0111	0.0164	0.067	0.0095	0	0.0169	0.0315	0.0309	0.0088	0.0085	-0.0321	0.1914
TRAV4D-4	TRAJ43	0.2339	0.1392	0.159	0.0663	0.0365	0.0085	0.1774	0.05	0.0371	0.0289	-0.183	0.0404
TRAV4D-3	TRAJ44	0.0111	0	0	0	0	0	0.0037	0.0064	0	0	-0.0053	0.2525
TRAV4-2	TRAJ45	0	0.0164	0	0.0473	0.0851	0	0.0055	0.0095	0.0441	0.0426	0.0543	0.1768
TRAV4D-3	TRAJ45	0.0111	0	0	0.0757	0	0.0507	0.0037	0.0064	0.0421	0.0386	0.0542	0.1768
TRAV4D-2	TRAJ45	0	0	0	0	0	0.0254	0	0	0.0085	0.0147	0.0122	0.2525
TRAV4-4/DV10	TRAJ45	0	0.0082	0	0	0	0	0.0027	0.0047	0	0	-0.0039	0.2525
TRAV4D-4	TRAJ45	0.078	0.0819	0.0418	0.0568	0.0851	0.0338	0.0672	0.0221	0.0586	0.0257	-0.0117	0.5
TRAV4-2	TRAJ48	0.0111	0.0328	0	0.0473	0.1702	0.0845	0.0146	0.0167	0.1007	0.063	0.1175	0.0404
TRAV4D-3	TRAJ48	0.0446	0.0655	0	0.0757	0.0729	0	0.0367	0.0335	0.0495	0.0429	0.0177	0.2533
TRAV4D-4	TRAJ48	0.1225	0.2457	0.1758	0.2178	0.0122	0.0761	0.1813	0.0618	0.102	0.1052	-0.1003	0.1914
TRAV4-2	TRAJ49	0.0111	0.0082	0	0.0757	0.1094	0.0169	0.0064	0.0058	0.0673	0.0468	0.0848	0.0404
TRAV4D-3	TRAJ49	0	0.0491	0.1004	0.0473	0.158	0.0085	0.0498	0.0502	0.0713	0.0776	0.0292	0.5
TRAV4N-3	TRAJ49	0.0111	0	0	0	0	0.0169	0.0037	0.0064	0.0056	0.0098	0.0027	0.5
TRAV4D-4	TRAJ49	0.1782	0.1392	0.2846	0.0663	0	0.0169	0.2007	0.0753	0.0277	0.0345	-0.2245	0.0404
TRAV4D-3	TRAJ50	0	0.0082	0.0251	0.0568	0.0972	0.0676	0.0111	0.0128	0.0739	0.0209	0.0869	0.0404
TRAV4-2	TRAJ50	0	0.0082	0	0	0.0365	0.0254	0.0027	0.0047	0.0206	0.0187	0.0255	0.1768
TRAV4D-4	TRAJ50	0.1782	0.1228	0.1674	0.1799	0	0.0085	0.1561	0.0294	0.0628	0.1015	-0.1214	0.3313
TRAV4D-3	TRAJ52	0	0.0491	0.0084	0.0189	0.1216	0.0676	0.0192	0.0263	0.0694	0.0514	0.0694	0.0952
TRAV4-2	TRAJ52	0	0.0082	0	0	0.0243	0.0338	0.0027	0.0047	0.0194	0.0174	0.0238	0.1768
TRAV4D-4	TRAJ52	0.156	0.0983	0.2092	0.1041	0.0122	0.0338	0.1545	0.0555	0.05	0.0481	-0.1369	0.0952
TRAV4D-3	TRAJ53	0	0.0082	0	0.0189	0.0486	0.1014	0.0027	0.0047	0.0563	0.0418	0.0751	0.0383
TRAV4D-4	TRAJ53	0.1003	0.0164	0.0251	0.0663	0	0	0.0473	0.0461	0.0221	0.0383	-0.0351	0.1879
TRAV4D-3	TRAJ56	0	0.0082	0	0.1326	0.0851	0.1268	0.0027	0.0047	0.1148	0.0259	0.1529	0.0383
TRAV4-3	TRAJ56	0	0	0	0	0	0.0423	0	0	0.0141	0.0244	0.0202	0.2525
TRAV4-2	TRAJ56	0	0	0.0251	0	0.0122	0.0085	0.0084	0.0145	0.0069	0.0063	-0.0021	0.5
TRAV4D-4	TRAJ56	0.2117	0.1065	0.1088	0.1231	0	0	0.1423	0.0601	0.041	0.0711	-0.134	0.1879
TRAV4D-3	TRAJ57	0	0.0491	0.0335	0.0189	0.1702	0.093	0.0275	0.0251	0.094	0.0757	0.0905	0.1914
TRAV4-2	TRAJ57	0	0	0	0	0.0243	0	0	0	0.0081	0.014	0.0116	0.2525
TRAV4N-3	TRAJ57	0.0111	0.0246	0	0.0095	0.0122	0	0.0119	0.0123	0.0072	0.0064	-0.0067	0.4124
TRAV4D-4	TRAJ57	0.1225	0.1065	0.0418	0.1704	0	0.0338	0.0903	0.0427	0.0681	0.0902	-0.0297	0.3313
TRAV4D-3	TRAJ58	0	0.0164	0	0	0	0.0254	0.0055	0.0095	0.0085	0.0147	0.0043	0.5
TRAV4D-4	TRAJ58	0	0.0246	0	0.0189	0	0	0.0082	0.0142	0.0063	0.0109	-0.0027	0.5
TRAV5-1	TRAJ2	0	0.0082	0	0	0.0243	0	0.0027	0.0047	0.0081	0.014	0.0077	0.5
TRAV5D-4	TRAJ2	0	0	0.0251	0.0189	0	0	0.0084	0.0145	0.0063	0.0109	-0.003	0.5
TRAV5D-4	TRAJ4	0.0446	0.0164	0.0418	0.0284	0	0	0.0343	0.0155	0.0095	0.0164	-0.035	0.092
TRAV5D-4	TRAJ5	0.0111	0.0082	0.0084	0.0284	0	0.0423	0.0092	0.0016	0.0236	0.0216	0.0204	0.3313
TRAV5-1	TRAJ5	0.0111	0.0246	0	0	0	0.0254	0.0119	0.0123	0.0085	0.0147	-0.0049	0.5
TRAV5-1	TRAJ6	0.0111	0	0	0	0	0.0254	0.0037	0.0064	0.0085	0.0147	0.0069	0.5
TRAV5D-4	TRAJ6	0.0223	0.0655	0.0502	0.0189	0	0.0761	0.046	0.0219	0.0317	0.0396	-0.0199	0.3313
TRAV5D-4	TRAJ7	0	0	0	0.0189	0	0	0	0	0.0063	0.0109	0.0091	0.2525
TRAV5-1	TRAJ9	0.0111	0	0.0335	0.0284	0.0365	0.0338	0.0149	0.0171	0.0329	0.0041	0.0254	0.0952
TRAV5D-4	TRAJ9	0.0668	0.0328	0.0753	0.0473	0.0243	0	0.0583	0.0225	0.0239	0.0237	-0.0477	0.0952
TRAV5D-4	TRAJ11	0.0446	0	0	0.0189	0.0243	0.0338	0.0149	0.0257	0.0257	0.0075	0.0153	0.329
TRAV5-1	TRAJ11	0	0	0.067	0	0	0.0085	0.0223	0.0387	0.0028	0.0049	-0.0278	0.5
TRAV5-1	TRAJ12	0	0	0.0251	0.0379	0	0.0423	0.0084	0.0145	0.0267	0.0233	0.0259	0.1768
TRAV5D-4	TRAJ12	0.0334	0.0246	0.1004	0.0757	0.0122	0.0423	0.0528	0.0415	0.0434	0.0318	-0.0129	0.5
TRAV5D-4	TRAJ13	0.0668	0.131	0.1172	0.1231	0.1823	0.2366	0.105	0.0338	0.1807	0.0568	0.0956	0.0952
TRAV5-1	TRAJ13	0.0111	0	0	0.0095	0.0122	0.0761	0.0037	0.0064	0.0326	0.0377	0.041	0.092
TRAV5D-4	TRAJ15	0.0891	0.0409	0.1172	0.0852	0.1094	0.1775	0.0824	0.0386	0.124	0.0479	0.0544	0.3313
TRAV5-4	TRAJ15	0	0	0	0	0	0.0169	0	0	0.0056	0.0098	0.0081	0.2525
TRAV5-1	TRAJ15	0.0223	0.0573	0.0586	0.0284	0.0486	0.0169	0.0461	0.0206	0.0313	0.016	-0.0206	0.1914
TRAV5D-4	TRAJ16	0.0111	0.0082	0.0586	0.0663	0.0122	0.0592	0.026	0.0283	0.0459	0.0294	0.0277	0.0952
TRAV5-1	TRAJ16	0	0.0082	0.0502	0.0095	0.0365	0	0.0195	0.0269	0.0153	0.0189	-0.006	0.4124
TRAV5D-4	TRAJ17	0.0334	0.0246	0.0753	0.0568	0.0729	0.0423	0.0444	0.0271	0.0573	0.0153	0.0177	0.3313
TRAV5-1	TRAJ17	0	0.0246	0.067	0.0095	0.0365	0.0085	0.0305	0.0339	0.0182	0.0159	-0.0173	0.5
TRAV5D-4	TRAJ18	0.0111	0.0573	0.0167	0.0852	0.0243	0.1014	0.0284	0.0252	0.0703	0.0407	0.0576	0.0952
TRAV5-1	TRAJ18	0.0223	0.0328	0.0251	0.0189	0.0365	0.1099	0.0267	0.0054	0.0551	0.0483	0.0394	0.3313
TRAV5D-4	TRAJ21	0.1894	0.1065	0.0586	0.0852	0.1702	0.1775	0.1182	0.0662	0.1443	0.0513	0.0333	0.5
TRAV5-1	TRAJ21	0.0557	0.0409	0.0084	0.0189	0.0851	0.0676	0.035	0.0242	0.0572	0.0343	0.0306	0.1914
TRAV5-1	TRAJ22	0.0223	0.0082	0	0.0757	0.0486	0.0254	0.0102	0.0113	0.0499	0.0252	0.0556	0.0404
TRAV5D-4	TRAJ22	0.078	0.0409	0.0753	0.1704	0.0122	0.1268	0.0647	0.0207	0.1031	0.0817	0.0511	0.3313
TRAV5D-4	TRAJ23	0.1448	0.0819	0.0418	0.3408	0.316	0.1014	0.0895	0.0519	0.2527	0.1316	0.2014	0.0952
TRAV5-1	TRAJ23	0.0557	0.1474	0.0837	0.0284	0.2431	0.1014	0.0956	0.047	0.1243	0.1092	0.0373	0.5
TRAV5D-4	TRAJ24	0.0446	0.0082	0.0084	0.0189	0.0243	0.0507	0.0204	0.021	0.0313	0.017	0.0153	0.1914
TRAV5-1	TRAJ24	0	0	0.0335	0.0095	0	0.0254	0.0112	0.0193	0.0116	0.0128	0.0006	0.5
TRAV5D-4	TRAJ26	0.1448	0.0901	0.0335	0.2178	0.1945	0.2028	0.0895	0.0557	0.205	0.0118	0.1454	0.0404
TRAV5-1	TRAJ26	0.0223	0.0164	0	0.0189	0.1216	0.0676	0.0129	0.0116	0.0694	0.0514	0.0783	0.0952
TRAV5D-4	TRAJ27	0.1003	0.131	0.1088	0.3219	0.1823	0.2789	0.1134	0.0159	0.261	0.0715	0.1796	0.0404
TRAV5-1	TRAJ27	0.0446	0.1228	0.0335	0.0473	0.0851	0.0338	0.067	0.0487	0.0554	0.0266	-0.0158	0.5
TRAV5D-4	TRAJ28	0.0111	0.0082	0	0.0379	0.0486	0.0338	0.0064	0.0058	0.0401	0.0076	0.0475	0.0404
TRAV5-1	TRAJ28	0	0	0	0.0095	0	0	0	0	0.0032	0.0055	0.0046	0.2525
TRAV5D-4	TRAJ30	0.0334	0.0409	0	0.2367	0.0608	0.0507	0.0248	0.0218	0.1161	0.1046	0.1231	0.0404
TRAV5-1	TRAJ30	0	0.0491	0.1088	0.0663	0.0365	0.0169	0.0526	0.0545	0.0399	0.0249	-0.0175	0.5
TRAV5D-4	TRAJ31	0.1671	0.2293	0.0753	0.3314	0.3525	0.5746	0.1572	0.0775	0.4195	0.1347	0.2947	0.0404
TRAV5-1	TRAJ31	0.0446	0.0491	0.0251	0.0473	0.1945	0.1014	0.0396	0.0128	0.1144	0.0745	0.1002	0.0952
TRAV5D-4	TRAJ32	0.0557	0.0491	0.0418	0.3314	0.1702	0.2113	0.0489	0.007	0.2376	0.0838	0.2387	0.0404
TRAV5-1	TRAJ32	0	0.0082	0.0251	0	0.0243	0.0507	0.0111	0.0128	0.025	0.0254	0.0197	0.4124
TRAV5D-4	TRAJ33	0.1225	0.0491	0.0753	0.1799	0.0729	0.1183	0.0823	0.0372	0.1237	0.0537	0.0542	0.3313
TRAV5-1	TRAJ33	0	0.0328	0.0335	0.0189	0.0122	0	0.0221	0.0191	0.0104	0.0096	-0.0166	0.2533
TRAV5D-4	TRAJ34	0.1003	0.1146	0.0335	0.284	0.3039	0.2028	0.0828	0.0433	0.2636	0.0536	0.2228	0.0404
TRAV5-1	TRAJ34	0.0111	0.0328	0.0335	0.0757	0.0729	0.0845	0.0258	0.0127	0.0777	0.0061	0.0712	0.0404
TRAV5D-4	TRAJ35	0	0.0491	0.0084	0.1515	0.1945	0.093	0.0192	0.0263	0.1463	0.0509	0.1695	0.0404
TRAV5-1	TRAJ35	0	0.0082	0	0.0095	0.0608	0	0.0027	0.0047	0.0234	0.0327	0.0295	0.1768
TRAV5D-4	TRAJ37	0.0557	0.0573	0.1004	0.161	0.1459	0.2451	0.0711	0.0254	0.184	0.0535	0.1446	0.0404
TRAV5-1	TRAJ37	0.0111	0.0246	0	0	0	0.0169	0.0119	0.0123	0.0056	0.0098	-0.009	0.3214
TRAV5D-4	TRAJ38	0.0111	0.0082	0	0.1041	0	0.0761	0.0064	0.0058	0.0601	0.0539	0.075	0.2533
TRAV5-1	TRAJ38	0	0	0	0.0095	0	0	0	0	0.0032	0.0055	0.0046	0.2525
TRAV5D-4	TRAJ39	0.1337	0.172	0.159	0.303	0.316	0.2282	0.1549	0.0195	0.2824	0.0474	0.1511	0.0404
TRAV5-1	TRAJ39	0	0.0328	0.0251	0.0189	0.1823	0.0845	0.0193	0.0172	0.0952	0.0822	0.1036	0.1914
TRAV5D-4	TRAJ40	0.1114	0.1065	0.0251	0.3503	0.2553	0.2789	0.081	0.0485	0.2948	0.0495	0.2604	0.0404
TRAV5-1	TRAJ40	0	0.0246	0	0.0284	0.0851	0.0592	0.0082	0.0142	0.0576	0.0284	0.069	0.0383
TRAV5-1	TRAJ42	0	0	0	0.0189	0.0365	0	0	0	0.0185	0.0183	0.0264	0.0984
TRAV5D-4	TRAJ42	0.1225	0.0573	0.0586	0.142	0.0365	0.1183	0.0795	0.0373	0.0989	0.0554	0.0257	0.5
TRAV5D-4	TRAJ43	0.0111	0.0573	0.0753	0.3124	0.389	0.2873	0.0479	0.0331	0.3296	0.053	0.3435	0.0404
TRAV5-1	TRAJ43	0.0111	0.0082	0.0502	0.0095	0.0243	0.0085	0.0232	0.0235	0.0141	0.0088	-0.0129	0.5
TRAV5D-4	TRAJ45	0.0334	0.0328	0.0335	0.4923	0.2553	0.4732	0.0332	0.0004	0.4069	0.1317	0.4454	0.0404
TRAV5-1	TRAJ45	0	0	0	0.0095	0.0243	0	0	0	0.0113	0.0122	0.0162	0.0984
TRAV5-4	TRAJ45	0	0.0082	0	0.0095	0.0122	0.0085	0.0027	0.0047	0.0101	0.0019	0.0106	0.0383
TRAV5D-4	TRAJ48	0.0557	0.0901	0.0167	0.3503	0.0972	0.1859	0.0542	0.0367	0.2111	0.1284	0.2002	0.0404
TRAV5D-4	TRAJ49	0.0446	0.0655	0.1255	0.2556	0.1702	0.1944	0.0785	0.042	0.2067	0.044	0.162	0.0404
TRAV5D-4	TRAJ50	0.0891	0.1146	0.0167	0.2462	0.1702	0.2028	0.0735	0.0508	0.2064	0.0381	0.1684	0.0404
TRAV5D-4	TRAJ52	0.078	0.0819	0.0167	0.2556	0.1216	0.2113	0.0589	0.0366	0.1962	0.0683	0.1759	0.0404
TRAV5D-4	TRAJ53	0.0668	0.1146	0.067	0.0757	0.0972	0.093	0.0828	0.0275	0.0886	0.0114	0.0077	0.3313
TRAV5D-4	TRAJ56	0.1337	0.1228	0.0502	0.3598	0.2796	0.1859	0.1022	0.0454	0.2751	0.087	0.2102	0.0404
TRAV5-4	TRAJ56	0	0.0409	0	0	0	0	0.0136	0.0236	0	0	-0.0195	0.2525
TRAV5D-4	TRAJ57	0.156	0.0328	0	0.2462	0.0851	0.1099	0.0629	0.0822	0.1471	0.0867	0.11	0.1914
TRAV5D-4	TRAJ58	0.0111	0.0164	0.0084	0.0757	0.0729	0.0676	0.012	0.0041	0.0721	0.0041	0.0832	0.0404
TRAV6D-5	TRAJ2	0.0111	0.0164	0	0	0.0365	0.0254	0.0092	0.0084	0.0206	0.0187	0.0162	0.2533
TRAV6-1	TRAJ2	0.0223	0	0	0	0	0.0507	0.0074	0.0129	0.0169	0.0293	0.0135	0.5
TRAV6D-7	TRAJ2	0	0.0328	0	0	0	0.0423	0.0109	0.0189	0.0141	0.0244	0.0046	0.5
TRAV6-5	TRAJ2	0	0	0	0.0095	0	0	0	0	0.0032	0.0055	0.0046	0.2525
TRAV6N-6	TRAJ2	0.0223	0	0	0	0	0	0.0074	0.0129	0	0	-0.0106	0.2525
TRAV6-1	TRAJ4	0	0	0	0	0.0365	0.0254	0	0	0.0206	0.0187	0.0294	0.0984
TRAV6-4	TRAJ4	0	0	0	0	0	0.0338	0	0	0.0113	0.0195	0.0162	0.2525
TRAV6D-4	TRAJ4	0.0111	0	0	0	0	0.0338	0.0037	0.0064	0.0113	0.0195	0.0109	0.5
TRAV6D-7	TRAJ4	0.0557	0.0737	0.0084	0.0852	0.0729	0	0.0459	0.0337	0.0527	0.0461	0.0093	0.5
TRAV6-2	TRAJ4	0.0111	0	0	0.0095	0	0.0085	0.0037	0.0064	0.006	0.0052	0.0033	0.5
TRAV6-6	TRAJ4	0	0	0.0084	0	0	0	0.0028	0.0048	0	0	-0.004	0.2525
TRAV6D-5	TRAJ4	0.0111	0.0328	0.0251	0	0.0486	0.0085	0.023	0.011	0.019	0.026	-0.0057	0.3313
TRAV6N-6	TRAJ4	0.0446	0	0	0.0095	0	0	0.0149	0.0257	0.0032	0.0055	-0.0167	0.5
TRAV6-3	TRAJ4	0	0.0328	0.0251	0.0095	0	0	0.0193	0.0172	0.0032	0.0055	-0.023	0.1768
TRAV6-5	TRAJ4	0.0446	0.0246	0	0	0	0	0.0231	0.0223	0	0	-0.0329	0.0984
TRAV6D-6	TRAJ4	0.0446	0.0491	0.067	0.0189	0.0243	0	0.0536	0.0118	0.0144	0.0128	-0.0547	0.0404
TRAV6-6	TRAJ5	0	0	0	0.0095	0	0.0338	0	0	0.0144	0.0174	0.0206	0.0984
TRAV6D-4	TRAJ5	0	0	0	0.0095	0	0	0	0	0.0032	0.0055	0.0046	0.2525
TRAV6-1	TRAJ5	0	0.0246	0	0	0.0122	0	0.0082	0.0142	0.0041	0.007	-0.0059	0.5
TRAV6N-6	TRAJ5	0	0	0.0251	0	0	0.0085	0.0084	0.0145	0.0028	0.0049	-0.008	0.5
TRAV6D-5	TRAJ5	0.0111	0.0246	0.0251	0	0	0.0254	0.0203	0.0079	0.0085	0.0147	-0.0168	0.329
TRAV6D-6	TRAJ5	0.0111	0.0164	0.0251	0	0	0.0085	0.0175	0.0071	0.0028	0.0049	-0.021	0.0383
TRAV6-2	TRAJ5	0	0.0246	0.0251	0	0	0	0.0166	0.0143	0	0	-0.0238	0.0984
TRAV6D-7	TRAJ5	0.0111	0.0409	0.0335	0.0095	0	0	0.0285	0.0155	0.0032	0.0055	-0.0359	0.0383
TRAV6-5	TRAJ5	0.0557	0.1146	0.0084	0.0095	0.0365	0	0.0596	0.0532	0.0153	0.0189	-0.0616	0.1914
TRAV6D-5	TRAJ6	0.0334	0.0246	0	0	0.0972	0.0592	0.0193	0.0173	0.0521	0.049	0.0457	0.2533
TRAV6-2	TRAJ6	0.0223	0	0	0	0	0.0676	0.0074	0.0129	0.0225	0.039	0.0215	0.5
TRAV6D-7	TRAJ6	0.0446	0.0082	0.0753	0.0568	0	0.1099	0.0427	0.0336	0.0556	0.055	0.0177	0.5
TRAV6-1	TRAJ6	0	0	0	0.0284	0	0	0	0	0.0095	0.0164	0.0136	0.2525
TRAV6D-4	TRAJ6	0.0111	0	0	0	0	0	0.0037	0.0064	0	0	-0.0053	0.2525
TRAV6-7/DV9	TRAJ6	0.0111	0.0082	0	0	0	0	0.0064	0.0058	0	0	-0.0092	0.0984
TRAV6-6	TRAJ6	0	0.0573	0.0084	0	0	0.0254	0.0219	0.0309	0.0085	0.0147	-0.019	0.3214
TRAV6N-6	TRAJ6	0	0	0.067	0.0095	0	0.0085	0.0223	0.0387	0.006	0.0052	-0.0232	0.5
TRAV6-5	TRAJ6	0.0111	0.0655	0.0335	0.0284	0.0243	0	0.0367	0.0273	0.0176	0.0154	-0.0268	0.1914
TRAV6D-6	TRAJ6	0.0446	0.0328	0.0084	0	0.0243	0	0.0286	0.0185	0.0081	0.014	-0.029	0.092
TRAV6-3	TRAJ6	0.0111	0	0.0502	0	0	0	0.0204	0.0264	0	0	-0.0291	0.0984
TRAV6-1	TRAJ7	0	0	0	0	0	0.0254	0	0	0.0085	0.0147	0.0122	0.2525
TRAV6D-7	TRAJ7	0	0.0082	0	0	0	0	0.0027	0.0047	0	0	-0.0039	0.2525
TRAV6-6	TRAJ9	0	0	0	0	0.0365	0	0	0	0.0122	0.0211	0.0175	0.2525
TRAV6-5	TRAJ9	0.0111	0.0737	0	0.0284	0.0122	0.0507	0.0283	0.0397	0.0304	0.0193	0.0029	0.3313
TRAV6-3	TRAJ9	0.0111	0.0328	0.0251	0	0.0486	0.0254	0.023	0.011	0.0247	0.0243	0.0024	0.5
TRAV6D-4	TRAJ9	0.0223	0	0	0	0	0.0254	0.0074	0.0129	0.0085	0.0147	0.0016	0.5
TRAV6-4	TRAJ9	0.0223	0.0082	0	0.0095	0.0243	0	0.0102	0.0113	0.0113	0.0122	0.0016	0.4124
TRAV6-2	TRAJ9	0	0	0.0335	0.0189	0	0	0.0112	0.0193	0.0063	0.0109	-0.007	0.5
TRAV6D-7	TRAJ9	0.1003	0.0491	0.0418	0.0663	0	0.1014	0.0637	0.0319	0.0559	0.0515	-0.0106	0.5
TRAV6-1	TRAJ9	0.0111	0.0491	0.0251	0.0095	0.0486	0	0.0284	0.0192	0.0194	0.0258	-0.0127	0.1914
TRAV6D-6	TRAJ9	0.1003	0.0819	0.0586	0.0379	0.0365	0.0507	0.0803	0.0209	0.0417	0.0078	-0.0525	0.0404
TRAV6N-6	TRAJ9	0.0891	0.0655	0.0502	0.0379	0.0122	0	0.0683	0.0196	0.0167	0.0193	-0.0714	0.0404
TRAV6D-5	TRAJ9	0.1225	0.0164	0.0586	0.0284	0	0	0.0658	0.0534	0.0095	0.0164	-0.0783	0.092
TRAV6D-6	TRAJ11	0.0111	0.0246	0	0.0189	0.1094	0	0.0119	0.0123	0.0428	0.0585	0.0434	0.4124
TRAV6-1	TRAJ11	0	0	0	0.0189	0.0365	0.0338	0	0	0.0297	0.0095	0.0422	0.0318
TRAV6-4	TRAJ11	0.0111	0.0328	0	0.0095	0.0729	0	0.0146	0.0167	0.0275	0.0396	0.0182	0.4124
TRAV6-2	TRAJ11	0	0.0164	0	0.0095	0	0.0169	0.0055	0.0095	0.0088	0.0085	0.0047	0.3214
TRAV6-3	TRAJ11	0	0	0.0251	0.0189	0	0.0085	0.0084	0.0145	0.0091	0.0095	0.001	0.5
TRAV6D-7	TRAJ11	0.0111	0.0082	0.0502	0.0189	0.0243	0.0254	0.0232	0.0235	0.0229	0.0035	-0.0004	0.3313
TRAV6D-5	TRAJ11	0.0223	0	0	0.0095	0	0	0.0074	0.0129	0.0032	0.0055	-0.006	0.5
TRAV6-5	TRAJ11	0	0	0.0586	0	0	0.0338	0.0195	0.0338	0.0113	0.0195	-0.0117	0.5
TRAV6N-6	TRAJ11	0.0223	0.0409	0.0251	0	0.0122	0.0085	0.0294	0.01	0.0069	0.0063	-0.0319	0.0404
TRAV6-6	TRAJ12	0	0	0	0.0189	0.0365	0.0592	0	0	0.0382	0.0202	0.0541	0.0318
TRAV6D-4	TRAJ12	0.0111	0	0	0.0284	0	0.0254	0.0037	0.0064	0.0179	0.0156	0.0203	0.1768
TRAV6D-3	TRAJ12	0	0.0082	0	0	0	0	0.0027	0.0047	0	0	-0.0039	0.2525
TRAV6-1	TRAJ12	0.0111	0.0409	0.0418	0.0189	0.0122	0.0338	0.0313	0.0175	0.0216	0.0111	-0.0136	0.3313
TRAV6-4	TRAJ12	0	0.0491	0.0418	0.0189	0.0243	0	0.0303	0.0265	0.0144	0.0128	-0.0224	0.2533
TRAV6-3	TRAJ12	0.0334	0.0409	0.0167	0.0189	0	0	0.0303	0.0124	0.0063	0.0109	-0.034	0.092
TRAV6-2	TRAJ12	0	0	0.0837	0	0	0	0.0279	0.0483	0	0	-0.0397	0.2525
TRAV6D-6	TRAJ12	0.1448	0.0328	0.1758	0.0947	0.0608	0.1014	0.1178	0.0752	0.0856	0.0218	-0.0422	0.3313
TRAV6N-6	TRAJ12	0.0223	0.1883	0.0084	0.0189	0.0365	0	0.073	0.1001	0.0185	0.0183	-0.0752	0.3313
TRAV6-5	TRAJ12	0.0668	0.1228	0.0335	0.0189	0.0122	0.0254	0.0744	0.0451	0.0188	0.0066	-0.0767	0.0404
TRAV6D-7	TRAJ12	0.0668	0.172	0.2762	0.0947	0.1216	0.093	0.1717	0.1047	0.1031	0.016	-0.087	0.3313
TRAV6D-5	TRAJ12	0.1003	0.0655	0.0837	0.0284	0.0122	0.0085	0.0832	0.0174	0.0164	0.0106	-0.0918	0.0404
TRAV6-1	TRAJ13	0.0223	0.0082	0	0.0473	0.0122	0.0085	0.0102	0.0113	0.0227	0.0214	0.0177	0.1914
TRAV6D-4	TRAJ13	0	0	0	0	0.0365	0	0	0	0.0122	0.0211	0.0175	0.2525
TRAV6-6	TRAJ13	0	0	0	0	0	0.0169	0	0	0.0056	0.0098	0.0081	0.2525
TRAV6-3	TRAJ13	0	0	0.0335	0.0095	0	0.0338	0.0112	0.0193	0.0144	0.0174	0.0046	0.3214
TRAV6-4	TRAJ13	0.0111	0.0082	0	0	0.0243	0	0.0064	0.0058	0.0081	0.014	0.0024	0.5
TRAV6D-7	TRAJ13	0.0111	0.1146	0.0418	0.0379	0.0365	0.0676	0.0558	0.0532	0.0473	0.0176	-0.0117	0.5
TRAV6-7/DV9	TRAJ13	0	0.0328	0	0	0	0	0.0109	0.0189	0	0	-0.0156	0.2525
TRAV6-2	TRAJ13	0	0.0819	0.0251	0	0.0365	0.0085	0.0357	0.042	0.015	0.0191	-0.0291	0.4124
TRAV6D-5	TRAJ13	0.0557	0.0164	0.0753	0.0189	0.0608	0	0.0491	0.03	0.0266	0.0311	-0.0313	0.3313
TRAV6N-6	TRAJ13	0.0446	0.0573	0	0	0	0.0254	0.034	0.0301	0.0085	0.0147	-0.036	0.1768
TRAV6-5	TRAJ13	0.0446	0.0491	0.0335	0	0	0.0338	0.0424	0.008	0.0113	0.0195	-0.0437	0.092
TRAV6D-6	TRAJ13	0.0557	0.1228	0.0335	0.0284	0.0365	0.0085	0.0707	0.0465	0.0245	0.0144	-0.0636	0.0952
TRAV6-6	TRAJ15	0.0223	0.0082	0	0.0757	0.0486	0.1014	0.0102	0.0113	0.0752	0.0264	0.09	0.0404
TRAV6D-7	TRAJ15	0.1225	0.172	0.1925	0.1041	0.1094	0.338	0.1623	0.036	0.1838	0.1335	0.0264	0.3313
TRAV6-2	TRAJ15	0.0111	0.0328	0	0.0095	0.0365	0	0.0146	0.0167	0.0153	0.0189	0.001	0.4124
TRAV6-4	TRAJ15	0.0334	0.0246	0	0.0189	0.0122	0	0.0193	0.0173	0.0104	0.0096	-0.0127	0.2533
TRAV6D-4	TRAJ15	0.0223	0.0328	0	0.0189	0	0	0.0184	0.0168	0.0063	0.0109	-0.0172	0.1768
TRAV6-3	TRAJ15	0.0223	0	0.0753	0.0189	0	0.0085	0.0325	0.0387	0.0091	0.0095	-0.0331	0.2533
TRAV6-1	TRAJ15	0.0223	0.0409	0.0251	0	0.0122	0	0.0294	0.01	0.0041	0.007	-0.0359	0.0383
TRAV6D-5	TRAJ15	0.0446	0.0409	0.0921	0.0379	0	0.0507	0.0592	0.0286	0.0295	0.0264	-0.041	0.1914
TRAV6-5	TRAJ15	0.0446	0.0819	0.0084	0.0095	0	0.0169	0.045	0.0368	0.0088	0.0085	-0.0509	0.1914
TRAV6N-6	TRAJ15	0.0223	0.131	0.1088	0.0189	0.0122	0.0085	0.0874	0.0574	0.0132	0.0053	-0.102	0.0404
TRAV6D-6	TRAJ15	0.1448	0.1392	0.1758	0.0568	0.0243	0.0169	0.1533	0.0197	0.0327	0.0212	-0.1593	0.0404
TRAV6-3	TRAJ16	0	0.0082	0	0	0.0486	0.0085	0.0027	0.0047	0.019	0.026	0.0233	0.1768
TRAV6-6	TRAJ16	0	0.0082	0	0	0.0365	0	0.0027	0.0047	0.0122	0.0211	0.0136	0.5
TRAV6D-7	TRAJ16	0.0334	0	0	0.0095	0	0.0254	0.0111	0.0193	0.0116	0.0128	0.0007	0.5
TRAV6-4	TRAJ16	0	0.0082	0	0	0	0	0.0027	0.0047	0	0	-0.0039	0.2525
TRAV6D-4	TRAJ16	0.0111	0	0	0	0	0	0.0037	0.0064	0	0	-0.0053	0.2525
TRAV6D-5	TRAJ16	0	0.0246	0	0	0	0	0.0082	0.0142	0	0	-0.0118	0.2525
TRAV6D-6	TRAJ16	0.0446	0.0246	0.067	0.0568	0.0486	0	0.0454	0.0212	0.0351	0.0307	-0.0143	0.5
TRAV6-1	TRAJ16	0	0.0328	0	0	0	0	0.0109	0.0189	0	0	-0.0156	0.2525
TRAV6N-6	TRAJ16	0	0.0246	0.0251	0	0	0	0.0166	0.0143	0	0	-0.0238	0.0984
TRAV6-2	TRAJ16	0.0111	0	0.0586	0	0	0.0085	0.0232	0.0311	0.0028	0.0049	-0.0291	0.1768
TRAV6-5	TRAJ16	0.0111	0.0655	0.0418	0.0095	0.0243	0.0085	0.0395	0.0273	0.0141	0.0088	-0.0357	0.0952
TRAV6-6	TRAJ17	0.0111	0.0164	0	0.0284	0.0729	0.0507	0.0092	0.0084	0.0507	0.0223	0.0581	0.0404
TRAV6-5	TRAJ17	0.0334	0	0	0.0568	0	0	0.0111	0.0193	0.0189	0.0328	0.0111	0.5
TRAV6-1	TRAJ17	0.0223	0	0	0	0	0.0254	0.0074	0.0129	0.0085	0.0147	0.0016	0.5
TRAV6-2	TRAJ17	0	0.0082	0.0251	0	0.0365	0	0.0111	0.0128	0.0122	0.0211	0.0016	0.5
TRAV6-3	TRAJ17	0.0111	0	0.0251	0.0189	0	0.0085	0.0121	0.0126	0.0091	0.0095	-0.0043	0.4124
TRAV6D-4	TRAJ17	0.0111	0	0	0	0	0	0.0037	0.0064	0	0	-0.0053	0.2525
TRAV6-7/DV9	TRAJ17	0.0223	0	0.0084	0.0095	0	0	0.0102	0.0113	0.0032	0.0055	-0.01	0.3214
TRAV6-4	TRAJ17	0.0111	0	0.0335	0.0095	0	0.0085	0.0149	0.0171	0.006	0.0052	-0.0127	0.2533
TRAV6D-5	TRAJ17	0.0334	0.0983	0.0167	0.0095	0.0729	0	0.0495	0.0431	0.0275	0.0396	-0.0306	0.1914
TRAV6D-7	TRAJ17	0.078	0.0328	0.0586	0.0473	0.0122	0.0338	0.0565	0.0227	0.0311	0.0177	-0.0351	0.1914
TRAV6D-6	TRAJ17	0.1003	0.0409	0.0753	0.0284	0.0365	0	0.0722	0.0298	0.0216	0.0192	-0.0697	0.0404
TRAV6N-6	TRAJ17	0.0446	0.0901	0.0837	0	0	0.0085	0.0728	0.0246	0.0028	0.0049	-0.0973	0.0383
TRAV6-6	TRAJ18	0	0	0	0.0852	0.0122	0.0507	0	0	0.0494	0.0365	0.0696	0.0318
TRAV6-1	TRAJ18	0.0111	0	0	0.0473	0	0.093	0.0037	0.0064	0.0468	0.0465	0.0607	0.1768
TRAV6D-4	TRAJ18	0.0111	0	0	0	0.0365	0.0338	0.0037	0.0064	0.0234	0.0203	0.028	0.1768
TRAV6D-5	TRAJ18	0.0446	0.0491	0	0.0284	0.1094	0	0.0312	0.0271	0.0459	0.0568	0.0204	0.4124
TRAV6D-7	TRAJ18	0.0223	0.0491	0.1423	0.1041	0.0365	0.1014	0.0712	0.063	0.0807	0.0383	0.0127	0.5
TRAV6-2	TRAJ18	0.0223	0.0082	0	0.0095	0.0365	0	0.0102	0.0113	0.0153	0.0189	0.0073	0.4124
TRAV6-4	TRAJ18	0	0	0	0.0095	0	0	0	0	0.0032	0.0055	0.0046	0.2525
TRAV6-5	TRAJ18	0	0.0491	0.0251	0	0.0365	0.0423	0.0247	0.0246	0.0263	0.0229	0.0023	0.4124
TRAV6-7/DV9	TRAJ18	0	0	0.0084	0	0	0	0.0028	0.0048	0	0	-0.004	0.2525
TRAV6D-6	TRAJ18	0.0891	0.131	0.0837	0.0095	0.0972	0.0507	0.1013	0.0259	0.0525	0.0439	-0.0654	0.1914
TRAV6N-6	TRAJ18	0.0891	0.0246	0.0418	0	0.0122	0	0.0518	0.0334	0.0041	0.007	-0.067	0.0383
TRAV6-6	TRAJ21	0	0.0082	0	0.0379	0.0608	0.1014	0.0027	0.0047	0.0667	0.0322	0.0893	0.0383
TRAV6D-4	TRAJ21	0.0111	0	0	0	0	0.0254	0.0037	0.0064	0.0085	0.0147	0.0069	0.5
TRAV6-4	TRAJ21	0.0111	0.0328	0.0084	0.0095	0.0486	0.0085	0.0174	0.0134	0.0222	0.0229	0.0068	0.5
TRAV6-1	TRAJ21	0.0446	0.0164	0.0335	0.0189	0.0608	0.0085	0.0315	0.0142	0.0294	0.0277	-0.0029	0.5
TRAV6D-5	TRAJ21	0.0223	0.0164	0.0251	0.0284	0.0122	0	0.0213	0.0044	0.0135	0.0142	-0.0111	0.3313
TRAV6-7/DV9	TRAJ21	0	0.0246	0.0251	0	0	0	0.0166	0.0143	0	0	-0.0238	0.0984
TRAV6-3	TRAJ21	0.0111	0.0409	0.0167	0	0	0	0.0229	0.0158	0	0	-0.0327	0.0318
TRAV6D-7	TRAJ21	0.0446	0.172	0.1004	0.0379	0.0486	0.0761	0.1057	0.0639	0.0542	0.0197	-0.0688	0.1914
TRAV6N-6	TRAJ21	0.0446	0.0737	0.0586	0	0	0.0085	0.059	0.0146	0.0028	0.0049	-0.0787	0.0383
TRAV6-5	TRAJ21	0.0223	0.0737	0.1004	0	0	0	0.0655	0.0397	0	0	-0.0915	0.0318
TRAV6D-6	TRAJ21	0.1782	0.2211	0.2762	0.0757	0.0365	0.0423	0.2252	0.0491	0.0515	0.0212	-0.2206	0.0404
TRAV6-6	TRAJ22	0	0.0164	0.0084	0	0.0972	0.0676	0.0083	0.0082	0.0549	0.0498	0.0652	0.2533
TRAV6-3	TRAJ22	0	0.0655	0.0335	0.0284	0.1094	0.0169	0.033	0.0328	0.0516	0.0504	0.0257	0.5
TRAV6-2	TRAJ22	0	0	0	0.0095	0	0.0338	0	0	0.0144	0.0174	0.0206	0.0984
TRAV6-1	TRAJ22	0	0	0	0.0189	0	0	0	0	0.0063	0.0109	0.0091	0.2525
TRAV6-4	TRAJ22	0.0334	0.0573	0	0.0095	0.0365	0.0423	0.0302	0.0288	0.0294	0.0175	-0.0011	0.5
TRAV6D-4	TRAJ22	0.0446	0.0082	0.0251	0	0.0486	0.0085	0.026	0.0182	0.019	0.026	-0.0099	0.5
TRAV6D-5	TRAJ22	0.0446	0.1228	0.0251	0	0.0851	0.0338	0.0642	0.0517	0.0396	0.0428	-0.0337	0.3313
TRAV6N-6	TRAJ22	0.0111	0.1228	0.0502	0.0284	0.0122	0.0338	0.0614	0.0567	0.0248	0.0112	-0.0506	0.3313
TRAV6D-7	TRAJ22	0.078	0.1228	0.1674	0.0473	0.0243	0.1014	0.1227	0.0447	0.0577	0.0396	-0.086	0.0952
TRAV6-5	TRAJ22	0.0557	0.1146	0.159	0.0189	0.0243	0.0085	0.1098	0.0518	0.0172	0.008	-0.1257	0.0404
TRAV6D-6	TRAJ22	0.3119	0.2129	0.1255	0.0757	0.0729	0.0254	0.2168	0.0933	0.058	0.0283	-0.2018	0.0404
TRAV6D-7	TRAJ23	0.1114	0.1638	0.0837	0.3787	0.2188	0.2704	0.1196	0.0407	0.2893	0.0816	0.2036	0.0404
TRAV6-6	TRAJ23	0	0.0491	0.0502	0.0852	0.1094	0.1944	0.0331	0.0287	0.1297	0.0574	0.129	0.0404
TRAV6-2	TRAJ23	0.0446	0.0164	0	0.0189	0.1702	0.0507	0.0203	0.0226	0.0799	0.0798	0.0819	0.0952
TRAV6-4	TRAJ23	0.0111	0.0164	0	0.0284	0.0729	0	0.0092	0.0084	0.0338	0.0367	0.0347	0.2533
TRAV6-7/DV9	TRAJ23	0.0111	0.0082	0	0.0095	0	0	0.0064	0.0058	0.0032	0.0055	-0.0046	0.3214
TRAV6D-4	TRAJ23	0.0111	0.0328	0	0.0095	0.0243	0	0.0146	0.0167	0.0113	0.0122	-0.0047	0.4124
TRAV6D-5	TRAJ23	0.0446	0.0983	0.0837	0.0284	0.0608	0.1014	0.0755	0.0278	0.0635	0.0366	-0.0162	0.5
TRAV6-1	TRAJ23	0.0334	0.0655	0.0418	0.0189	0.0243	0.0592	0.0469	0.0166	0.0341	0.0219	-0.0177	0.1914
TRAV6-3	TRAJ23	0.0111	0.0246	0.0921	0.0379	0	0.0338	0.0426	0.0434	0.0239	0.0208	-0.0261	0.5
TRAV6-5	TRAJ23	0.1114	0.2211	0.0335	0.0663	0.0972	0.1014	0.122	0.0942	0.0883	0.0192	-0.044	0.3313
TRAV6N-6	TRAJ23	0.156	0.1065	0.0586	0.0189	0.0122	0.0085	0.107	0.0487	0.0132	0.0053	-0.1277	0.0404
TRAV6D-6	TRAJ23	0.1671	0.4504	0.4185	0.1326	0.0608	0.0761	0.3453	0.1552	0.0898	0.0378	-0.3039	0.0404
TRAV6-6	TRAJ24	0	0	0	0.0284	0.0365	0	0	0	0.0216	0.0192	0.0308	0.0984
TRAV6-2	TRAJ24	0	0	0	0	0	0.0169	0	0	0.0056	0.0098	0.0081	0.2525
TRAV6N-6	TRAJ24	0	0.0246	0	0	0.0122	0	0.0082	0.0142	0.0041	0.007	-0.0059	0.5
TRAV6D-7	TRAJ24	0	0.0409	0.0335	0	0.0486	0.0085	0.0248	0.0218	0.019	0.026	-0.0082	0.4124
TRAV6-5	TRAJ24	0.0111	0	0.0251	0.0095	0	0.0085	0.0121	0.0126	0.006	0.0052	-0.0087	0.2533
TRAV6-3	TRAJ24	0	0	0.0251	0	0	0	0.0084	0.0145	0	0	-0.0121	0.2525
TRAV6D-6	TRAJ24	0.0446	0.0409	0.0586	0.0379	0	0	0.048	0.0093	0.0126	0.0219	-0.0496	0.0383
TRAV6-6	TRAJ26	0	0.0164	0.0084	0.0568	0.0608	0.1183	0.0083	0.0082	0.0786	0.0344	0.0972	0.0404
TRAV6-1	TRAJ26	0	0.0328	0	0.0284	0.1094	0.0676	0.0109	0.0189	0.0685	0.0405	0.0799	0.092
TRAV6-4	TRAJ26	0	0.0082	0	0.0095	0.0365	0.0845	0.0027	0.0047	0.0435	0.038	0.0575	0.0383
TRAV6D-4	TRAJ26	0	0	0	0.0095	0	0.0254	0	0	0.0116	0.0128	0.0166	0.0984
TRAV6D-7	TRAJ26	0.1003	0.1802	0.1423	0.1894	0.1337	0.1352	0.1409	0.04	0.1528	0.0317	0.015	0.5
TRAV6-2	TRAJ26	0	0	0	0.0284	0	0	0	0	0.0095	0.0164	0.0136	0.2525
TRAV6D-5	TRAJ26	0.0111	0.0409	0.0335	0	0.0122	0.0676	0.0285	0.0155	0.0266	0.036	-0.0027	0.5
TRAV6-7/DV9	TRAJ26	0.0111	0	0	0	0	0	0.0037	0.0064	0	0	-0.0053	0.2525
TRAV6-3	TRAJ26	0.0334	0.0246	0	0.0189	0	0.0254	0.0193	0.0173	0.0148	0.0132	-0.0064	0.4124
TRAV6-5	TRAJ26	0.0891	0.0737	0.0753	0.0473	0.0608	0.0761	0.0794	0.0085	0.0614	0.0144	-0.0243	0.1914
TRAV6N-6	TRAJ26	0.0111	0.0164	0.1088	0	0	0.0169	0.0454	0.0549	0.0056	0.0098	-0.056	0.1879
TRAV6D-6	TRAJ26	0.2005	0.1474	0.1841	0.0757	0.0608	0.1183	0.1773	0.0272	0.0849	0.0298	-0.1179	0.0404
TRAV6-6	TRAJ27	0.0111	0.0164	0.0502	0.0189	0.1459	0.0592	0.0259	0.0212	0.0747	0.0649	0.067	0.0952
TRAV6-4	TRAJ27	0	0.0409	0	0.0568	0.0365	0.0085	0.0136	0.0236	0.0339	0.0243	0.0286	0.1879
TRAV6D-4	TRAJ27	0	0.0082	0.0335	0.0284	0.0486	0.0085	0.0139	0.0175	0.0285	0.0201	0.0206	0.1914
TRAV6-7/DV9	TRAJ27	0	0	0	0.0284	0	0	0	0	0.0095	0.0164	0.0136	0.2525
TRAV6D-7	TRAJ27	0.0891	0.131	0.067	0.142	0.0972	0.0761	0.0957	0.0325	0.1051	0.0337	0.0123	0.3313
TRAV6-3	TRAJ27	0.0557	0	0.0167	0.0284	0	0.0507	0.0241	0.0286	0.0264	0.0254	0.0032	0.4124
TRAV6D-5	TRAJ27	0.0111	0.0655	0.0502	0.0473	0.0486	0.0254	0.0423	0.0281	0.0404	0.013	-0.0026	0.3313
TRAV6N-6	TRAJ27	0.0223	0	0	0.0095	0	0	0.0074	0.0129	0.0032	0.0055	-0.006	0.5
TRAV6-2	TRAJ27	0.0111	0.0409	0	0.0095	0	0	0.0173	0.0212	0.0032	0.0055	-0.0201	0.1768
TRAV6-1	TRAJ27	0.0223	0.0246	0.1004	0.0284	0	0.0254	0.0491	0.0444	0.0179	0.0156	-0.0436	0.5
TRAV6-5	TRAJ27	0.1003	0.0819	0.1925	0.0663	0.0365	0.0507	0.1249	0.0593	0.0512	0.0149	-0.0978	0.0404
TRAV6D-6	TRAJ27	0.1448	0.1228	0.1841	0.0852	0.0122	0.0085	0.1506	0.0311	0.0353	0.0433	-0.1523	0.0404
TRAV6-4	TRAJ28	0	0	0	0	0	0.0338	0	0	0.0113	0.0195	0.0162	0.2525
TRAV6D-4	TRAJ28	0	0	0	0.0095	0	0	0	0	0.0032	0.0055	0.0046	0.2525
TRAV6D-7	TRAJ28	0.0668	0.0328	0.0418	0.0379	0.0729	0.0254	0.0471	0.0176	0.0454	0.0246	-0.0023	0.5
TRAV6-3	TRAJ28	0.0111	0.0409	0	0.0095	0.0122	0	0.0173	0.0212	0.0072	0.0064	-0.0144	0.4124
TRAV6-5	TRAJ28	0.0223	0.0246	0.0335	0	0.0122	0	0.0268	0.0059	0.0041	0.007	-0.0323	0.0383
TRAV6D-6	TRAJ28	0.0111	0.0573	0.0586	0	0	0.0338	0.0423	0.0271	0.0113	0.0195	-0.0436	0.092
TRAV6-6	TRAJ30	0	0.0328	0.0921	0.0189	0.1337	0.1014	0.0416	0.0467	0.0847	0.0592	0.0585	0.1914
TRAV6D-7	TRAJ30	0.0111	0.0983	0.1255	0.1136	0.0729	0.1437	0.0783	0.0598	0.1101	0.0355	0.0419	0.3313
TRAV6-2	TRAJ30	0.0111	0	0.0251	0.0379	0.0365	0.0338	0.0121	0.0126	0.0361	0.0021	0.0338	0.0404
TRAV6-1	TRAJ30	0	0.0409	0.0335	0.0189	0.0729	0.0254	0.0248	0.0218	0.0391	0.0295	0.02	0.5
TRAV6-4	TRAJ30	0.0111	0	0	0.0189	0	0	0.0037	0.0064	0.0063	0.0109	0.0037	0.5
TRAV6D-4	TRAJ30	0.0111	0	0	0	0	0	0.0037	0.0064	0	0	-0.0053	0.2525
TRAV6-7/DV9	TRAJ30	0	0.0082	0.0084	0	0	0	0.0055	0.0048	0	0	-0.0079	0.0984
TRAV6-3	TRAJ30	0.0334	0.0246	0.0418	0.0284	0	0.0085	0.0333	0.0086	0.0123	0.0146	-0.0296	0.0952
TRAV6-5	TRAJ30	0.0891	0.0655	0	0.0284	0.0122	0.0254	0.0515	0.0462	0.022	0.0086	-0.0411	0.3313
TRAV6N-6	TRAJ30	0.0223	0.0819	0.0335	0.0379	0	0	0.0459	0.0317	0.0126	0.0219	-0.0467	0.1879
TRAV6D-5	TRAJ30	0	0.1146	0.0084	0.0095	0.0122	0	0.041	0.0639	0.0072	0.0064	-0.0476	0.4124
TRAV6D-6	TRAJ30	0.2896	0.131	0.1674	0.0473	0.0851	0.0845	0.196	0.0831	0.0723	0.0217	-0.1575	0.0404
TRAV6D-7	TRAJ31	0.1337	0.0409	0.0586	0.2367	0.1459	0.2282	0.0777	0.0493	0.2036	0.0502	0.1594	0.0404
TRAV6-6	TRAJ31	0	0.0328	0.0167	0.0473	0.1094	0.1014	0.0165	0.0164	0.086	0.0338	0.0954	0.0404
TRAV6-2	TRAJ31	0.0334	0.0328	0.0084	0.0095	0.0729	0.1099	0.0249	0.0143	0.0641	0.0508	0.0542	0.1914
TRAV6-1	TRAJ31	0	0.0491	0.0837	0.0284	0.1094	0.0592	0.0443	0.0421	0.0657	0.0409	0.0293	0.3313
TRAV6-7/DV9	TRAJ31	0	0.0164	0	0	0	0	0.0055	0.0095	0	0	-0.0079	0.2525
TRAV6N-7	TRAJ31	0.0223	0	0	0	0	0	0.0074	0.0129	0	0	-0.0106	0.2525
TRAV6D-4	TRAJ31	0.0111	0.0328	0	0.0189	0	0	0.0146	0.0167	0.0063	0.0109	-0.0119	0.3214
TRAV6-4	TRAJ31	0.0334	0	0.0335	0.0095	0	0.0085	0.0223	0.0193	0.006	0.0052	-0.0232	0.2533
TRAV6D-5	TRAJ31	0.0557	0.1228	0.0335	0.0189	0.0729	0.0507	0.0707	0.0465	0.0475	0.0271	-0.0316	0.3313
TRAV6-3	TRAJ31	0	0.0491	0.067	0.0095	0.0243	0.0085	0.0387	0.0347	0.0141	0.0088	-0.0346	0.3313
TRAV6N-6	TRAJ31	0.0446	0.0328	0.1088	0.0095	0	0.0169	0.0621	0.0409	0.0088	0.0085	-0.0743	0.0404
TRAV6-5	TRAJ31	0.156	0.2948	0.0586	0.0852	0.0486	0.0676	0.1698	0.1187	0.0671	0.0183	-0.1326	0.1914
TRAV6D-6	TRAJ31	0.4901	0.5159	0.5105	0.1515	0.2188	0.2451	0.5055	0.0136	0.2051	0.0483	-0.3211	0.0404
TRAV6-6	TRAJ32	0	0	0	0.0473	0.0243	0.0845	0	0	0.052	0.0304	0.0731	0.0318
TRAV6D-4	TRAJ32	0	0.0082	0	0.0189	0.0365	0	0.0027	0.0047	0.0185	0.0183	0.0226	0.1768
TRAV6-2	TRAJ32	0	0	0	0.0189	0	0.0254	0	0	0.0148	0.0132	0.0212	0.0984
TRAV6-1	TRAJ32	0	0.0328	0	0.0473	0.0243	0	0.0109	0.0189	0.0239	0.0237	0.0184	0.3214
TRAV6D-7	TRAJ32	0.0446	0.1065	0.0586	0.0757	0.0972	0.0761	0.0699	0.0325	0.083	0.0123	0.0176	0.3313
TRAV6-3	TRAJ32	0.0111	0.0082	0.0251	0.0284	0.0365	0	0.0148	0.009	0.0216	0.0192	0.0096	0.3313
TRAV6-4	TRAJ32	0.0111	0.0164	0.0418	0.0095	0.0122	0.0676	0.0231	0.0164	0.0298	0.0328	0.0094	0.5
TRAV6-7/DV9	TRAJ32	0	0.0164	0	0	0.0122	0	0.0055	0.0095	0.0041	0.007	-0.002	0.5
TRAV6N-6	TRAJ32	0.0111	0	0	0	0	0	0.0037	0.0064	0	0	-0.0053	0.2525
TRAV6D-5	TRAJ32	0.0111	0.0082	0.0084	0	0	0	0.0092	0.0016	0	0	-0.0132	0.0318
TRAV6-5	TRAJ32	0.0446	0.1228	0	0.0284	0.0608	0.0169	0.0558	0.0622	0.0354	0.0228	-0.0281	0.5
TRAV6D-6	TRAJ32	0.1114	0.1228	0.0502	0.0284	0.0486	0.0085	0.0948	0.039	0.0285	0.0201	-0.0901	0.0404
TRAV6-1	TRAJ33	0	0	0.0251	0.0189	0.0365	0.0592	0.0084	0.0145	0.0382	0.0202	0.042	0.092
TRAV6-2	TRAJ33	0.0111	0	0	0	0.0365	0.0254	0.0037	0.0064	0.0206	0.0187	0.0241	0.1768
TRAV6-6	TRAJ33	0	0	0	0.0189	0.0243	0	0	0	0.0144	0.0128	0.0206	0.0984
TRAV6D-4	TRAJ33	0.0111	0	0.0251	0	0.0608	0.0085	0.0121	0.0126	0.0231	0.0329	0.0156	0.4124
TRAV6-3	TRAJ33	0.0111	0.0246	0.0084	0.0568	0.0122	0	0.0147	0.0087	0.023	0.0299	0.0118	0.5
TRAV6D-5	TRAJ33	0	0	0.0251	0.0189	0	0.0085	0.0084	0.0145	0.0091	0.0095	0.001	0.5
TRAV6-4	TRAJ33	0	0	0.0251	0.0095	0	0	0.0084	0.0145	0.0032	0.0055	-0.0075	0.5
TRAV6D-7	TRAJ33	0.078	0.0573	0	0.0379	0.0608	0	0.0451	0.0404	0.0329	0.0307	-0.0169	0.4124
TRAV6-5	TRAJ33	0.0223	0.0655	0.0084	0.0379	0.0122	0.0085	0.0321	0.0298	0.0195	0.016	-0.0177	0.5
TRAV6N-6	TRAJ33	0.0334	0	0.0251	0	0	0	0.0195	0.0174	0	0	-0.0279	0.0984
TRAV6D-6	TRAJ33	0.0111	0.0573	0.0753	0.0379	0.0243	0.0085	0.0479	0.0331	0.0236	0.0147	-0.0338	0.1914
TRAV6D-7	TRAJ34	0.1894	0.172	0.0418	0.1515	0.2917	0.1944	0.1344	0.0807	0.2125	0.0718	0.0961	0.1914
TRAV6-6	TRAJ34	0	0	0.0418	0.0568	0.0365	0.1352	0.0139	0.0241	0.0762	0.0521	0.086	0.092
TRAV6-1	TRAJ34	0	0.0164	0	0	0.0729	0.0423	0.0055	0.0095	0.0384	0.0366	0.0464	0.1768
TRAV6-3	TRAJ34	0.0223	0.0246	0.0084	0	0.0851	0.0338	0.0184	0.0088	0.0396	0.0428	0.0297	0.3313
TRAV6-4	TRAJ34	0	0.0246	0	0.0189	0.0486	0.0169	0.0082	0.0142	0.0281	0.0178	0.0282	0.1879
TRAV6-2	TRAJ34	0	0.0328	0	0	0.0243	0	0.0109	0.0189	0.0081	0.014	-0.004	0.5
TRAV6-7/DV9	TRAJ34	0	0	0.0084	0	0	0	0.0028	0.0048	0	0	-0.004	0.2525
TRAV6D-4	TRAJ34	0	0	0.0502	0	0.0243	0	0.0167	0.029	0.0081	0.014	-0.0123	0.5
TRAV6N-6	TRAJ34	0.0111	0.0737	0	0	0	0.0085	0.0283	0.0397	0.0028	0.0049	-0.0362	0.1768
TRAV6-5	TRAJ34	0.0557	0.0983	0.0837	0.0473	0.0608	0.0338	0.0792	0.0216	0.0473	0.0135	-0.0433	0.0952
TRAV6D-5	TRAJ34	0.0668	0.0655	0	0.0095	0	0.0085	0.0441	0.0382	0.006	0.0052	-0.0536	0.2533
TRAV6D-6	TRAJ34	0.3119	0.2129	0.4101	0.1326	0.0122	0.0676	0.3116	0.0986	0.0708	0.0603	-0.2926	0.0404
TRAV6D-7	TRAJ35	0.0668	0.0082	0	0.0284	0.0243	0.1014	0.025	0.0364	0.0514	0.0434	0.0367	0.1914
TRAV6D-5	TRAJ35	0	0	0	0.0095	0.0365	0.0254	0	0	0.0238	0.0136	0.0339	0.0318
TRAV6D-6	TRAJ35	0.0223	0.0328	0.0167	0	0.0851	0.0423	0.0239	0.0082	0.0425	0.0426	0.026	0.3313
TRAV6-2	TRAJ35	0	0.0082	0	0	0.0365	0	0.0027	0.0047	0.0122	0.0211	0.0136	0.5
TRAV6-1	TRAJ35	0.0111	0	0	0.0095	0	0.0254	0.0037	0.0064	0.0116	0.0128	0.0113	0.3214
TRAV6-6	TRAJ35	0	0	0	0.0189	0	0	0	0	0.0063	0.0109	0.0091	0.2525
TRAV6-5	TRAJ35	0	0	0	0.0095	0	0	0	0	0.0032	0.0055	0.0046	0.2525
TRAV6-7/DV9	TRAJ35	0	0.0246	0	0	0	0.0169	0.0082	0.0142	0.0056	0.0098	-0.0037	0.5
TRAV6D-4	TRAJ35	0	0	0.0586	0	0	0.0085	0.0195	0.0338	0.0028	0.0049	-0.0238	0.5
TRAV6D-7	TRAJ37	0.1225	0.0983	0	0.142	0.1702	0.1859	0.0736	0.0649	0.166	0.0222	0.1191	0.0404
TRAV6-6	TRAJ37	0	0.0164	0	0.0473	0.0608	0	0.0055	0.0095	0.036	0.0319	0.0431	0.1768
TRAV6-4	TRAJ37	0	0.0082	0.0251	0	0.0851	0.0254	0.0111	0.0128	0.0368	0.0437	0.0362	0.2533
TRAV6-1	TRAJ37	0	0	0	0.0379	0	0	0	0	0.0126	0.0219	0.0181	0.2525
TRAV6-2	TRAJ37	0.0111	0	0	0.0189	0	0	0.0037	0.0064	0.0063	0.0109	0.0037	0.5
TRAV6-7/DV9	TRAJ37	0.0446	0	0	0	0	0	0.0149	0.0257	0	0	-0.0213	0.2525
TRAV6-5	TRAJ37	0.0668	0.0246	0.0251	0.0189	0	0.0423	0.0388	0.0242	0.0204	0.0212	-0.0258	0.1914
TRAV6N-6	TRAJ37	0.0446	0	0.0335	0.0095	0	0.0085	0.026	0.0232	0.006	0.0052	-0.0284	0.2533
TRAV6D-5	TRAJ37	0.0668	0	0.0921	0.0095	0	0	0.053	0.0476	0.0032	0.0055	-0.0699	0.1768
TRAV6D-6	TRAJ37	0.0446	0.2047	0.1841	0.0663	0.0486	0.0761	0.1445	0.0871	0.0637	0.0139	-0.1056	0.3313
TRAV6D-7	TRAJ38	0.0111	0.0164	0.0167	0.0189	0.0851	0.0338	0.0147	0.0032	0.0459	0.0347	0.0437	0.0404
TRAV6-4	TRAJ38	0	0	0	0	0	0.0507	0	0	0.0169	0.0293	0.0242	0.2525
TRAV6-2	TRAJ38	0	0	0	0	0	0.0254	0	0	0.0085	0.0147	0.0122	0.2525
TRAV6-1	TRAJ38	0	0	0	0	0	0.0254	0	0	0.0085	0.0147	0.0122	0.2525
TRAV6-6	TRAJ38	0	0	0	0.0095	0	0	0	0	0.0032	0.0055	0.0046	0.2525
TRAV6-5	TRAJ38	0	0.0491	0.0084	0	0.0122	0	0.0192	0.0263	0.0041	0.007	-0.0215	0.3214
TRAV6D-6	TRAJ38	0	0.0655	0.0084	0	0.0122	0	0.0246	0.0356	0.0041	0.007	-0.0292	0.3214
TRAV6-6	TRAJ39	0.0111	0.0328	0	0.0379	0.1094	0.0254	0.0146	0.0167	0.0576	0.0453	0.0599	0.0952
TRAV6-1	TRAJ39	0	0.0082	0	0	0.0365	0.0676	0.0027	0.0047	0.0347	0.0338	0.0453	0.1768
TRAV6D-7	TRAJ39	0.1003	0.0328	0.0084	0.0852	0.0729	0.0676	0.0472	0.0476	0.0752	0.009	0.0381	0.3313
TRAV6-4	TRAJ39	0	0.0082	0	0	0.0365	0.0085	0.0027	0.0047	0.015	0.0191	0.0176	0.1768
TRAV6-3	TRAJ39	0	0.0082	0.0167	0.0189	0.0243	0.0085	0.0083	0.0084	0.0172	0.008	0.0127	0.0952
TRAV6D-4	TRAJ39	0	0.0082	0	0	0.0243	0	0.0027	0.0047	0.0081	0.014	0.0077	0.5
TRAV6-2	TRAJ39	0	0	0.0335	0.0095	0	0.0254	0.0112	0.0193	0.0116	0.0128	0.0006	0.5
TRAV6D-5	TRAJ39	0.0223	0.0409	0.0167	0.0284	0.0243	0	0.0266	0.0127	0.0176	0.0154	-0.0127	0.5
TRAV6N-6	TRAJ39	0.0111	0	0.0251	0	0	0	0.0121	0.0126	0	0	-0.0174	0.0984
TRAV6-5	TRAJ39	0.1225	0.0491	0	0.0095	0	0.0169	0.0572	0.0617	0.0088	0.0085	-0.0676	0.2533
TRAV6D-6	TRAJ39	0.1003	0.0901	0.159	0.0379	0.0608	0.0761	0.1165	0.0372	0.0583	0.0192	-0.0772	0.0404
TRAV6D-7	TRAJ40	0.1114	0.131	0.1004	0.1136	0.2066	0.169	0.1143	0.0155	0.1631	0.0468	0.0618	0.0952
TRAV6-1	TRAJ40	0	0.0082	0	0.0095	0.0365	0.0423	0.0027	0.0047	0.0294	0.0175	0.0379	0.0383
TRAV6-6	TRAJ40	0	0	0	0.0379	0.0243	0	0	0	0.0207	0.0192	0.0296	0.0984
TRAV6-4	TRAJ40	0	0	0	0.0568	0	0	0	0	0.0189	0.0328	0.027	0.2525
TRAV6N-6	TRAJ40	0.0111	0	0	0	0	0	0.0037	0.0064	0	0	-0.0053	0.2525
TRAV6-2	TRAJ40	0	0	0.0502	0.0284	0	0	0.0167	0.029	0.0095	0.0164	-0.0103	0.5
TRAV6-7/DV9	TRAJ40	0.0223	0	0	0	0	0	0.0074	0.0129	0	0	-0.0106	0.2525
TRAV6-3	TRAJ40	0.0111	0.0328	0.0251	0.0379	0	0	0.023	0.011	0.0126	0.0219	-0.0147	0.329
TRAV6D-5	TRAJ40	0	0.0328	0.0251	0.0095	0.0122	0	0.0193	0.0172	0.0072	0.0064	-0.0172	0.2533
TRAV6D-4	TRAJ40	0.0111	0.0328	0.0084	0	0.0122	0	0.0174	0.0134	0.0041	0.007	-0.019	0.1879
TRAV6D-6	TRAJ40	0.1671	0.0983	0.0251	0.0379	0.1337	0.0254	0.0968	0.071	0.0657	0.0592	-0.0415	0.5
TRAV6-5	TRAJ40	0.0334	0.1474	0.0586	0	0.0122	0.0423	0.0798	0.0599	0.0182	0.0218	-0.0847	0.0952
TRAV6-6	TRAJ42	0	0.0328	0	0.0095	0.1823	0.1268	0.0109	0.0189	0.1062	0.0882	0.13	0.092
TRAV6D-7	TRAJ42	0.1225	0.0819	0	0.161	0.2066	0.1099	0.0681	0.0624	0.1592	0.0484	0.1181	0.0952
TRAV6-3	TRAJ42	0	0.0082	0	0	0.0122	0.0845	0.0027	0.0047	0.0322	0.0457	0.0418	0.1768
TRAV6-2	TRAJ42	0	0.0082	0	0.0095	0.0608	0	0.0027	0.0047	0.0234	0.0327	0.0295	0.1768
TRAV6-1	TRAJ42	0	0.0082	0.0335	0.0095	0.0608	0.0338	0.0139	0.0175	0.0347	0.0257	0.0293	0.0952
TRAV6-4	TRAJ42	0	0	0.0251	0.0189	0	0.0676	0.0084	0.0145	0.0288	0.0349	0.0289	0.3214
TRAV6D-4	TRAJ42	0	0.0082	0	0.0284	0.0122	0.0254	0.0027	0.0047	0.022	0.0086	0.0275	0.0383
TRAV6-7/DV9	TRAJ42	0	0	0	0	0.0122	0	0	0	0.0041	0.007	0.0059	0.2525
TRAV6D-5	TRAJ42	0.0111	0.0491	0	0.0095	0.0365	0.0085	0.0201	0.0257	0.0182	0.0159	-0.0027	0.5
TRAV6N-6	TRAJ42	0	0	0.0335	0	0	0.0085	0.0112	0.0193	0.0028	0.0049	-0.012	0.5
TRAV6-5	TRAJ42	0.0334	0.0573	0	0.0095	0.0365	0.0085	0.0302	0.0288	0.0182	0.0159	-0.0169	0.5
TRAV6D-6	TRAJ42	0.078	0.0737	0.0921	0.0379	0.0243	0.0254	0.0813	0.0096	0.0292	0.0076	-0.0712	0.0404
TRAV6-6	TRAJ43	0.0223	0.0164	0	0	0.1216	0.0254	0.0129	0.0116	0.049	0.0641	0.0505	0.2533
TRAV6-4	TRAJ43	0	0.0246	0	0.0189	0.0365	0	0.0082	0.0142	0.0185	0.0183	0.0147	0.3214
TRAV6D-7	TRAJ43	0.078	0.1228	0.2092	0.1136	0.2188	0.093	0.1367	0.0667	0.1418	0.0675	0.0065	0.5
TRAV6-3	TRAJ43	0	0	0.0251	0.0189	0	0.0085	0.0084	0.0145	0.0091	0.0095	0.001	0.5
TRAV6N-6	TRAJ43	0.0111	0	0	0	0	0	0.0037	0.0064	0	0	-0.0053	0.2525
TRAV6-7/DV9	TRAJ43	0	0.0082	0.0084	0	0	0	0.0055	0.0048	0	0	-0.0079	0.0984
TRAV6-1	TRAJ43	0.0223	0.0082	0	0	0.0122	0	0.0102	0.0113	0.0041	0.007	-0.0087	0.3214
TRAV6D-5	TRAJ43	0	0.0328	0.0251	0.0095	0.0122	0.0085	0.0193	0.0172	0.0101	0.0019	-0.0131	0.3313
TRAV6D-4	TRAJ43	0.0334	0	0.0251	0.0095	0.0122	0	0.0195	0.0174	0.0072	0.0064	-0.0175	0.2533
TRAV6-5	TRAJ43	0.0223	0.0655	0.0502	0.0095	0.0243	0.0338	0.046	0.0219	0.0225	0.0122	-0.0328	0.1914
TRAV6-2	TRAJ43	0.0223	0.0246	0.0418	0.0095	0	0	0.0296	0.0107	0.0032	0.0055	-0.0375	0.0383
TRAV6D-6	TRAJ43	0.0557	0.131	0.0921	0.0095	0.0365	0.0254	0.0929	0.0377	0.0238	0.0136	-0.0942	0.0404
TRAV6-2	TRAJ44	0	0	0	0.0095	0	0	0	0	0.0032	0.0055	0.0046	0.2525
TRAV6-3	TRAJ44	0	0	0	0	0	0.0085	0	0	0.0028	0.0049	0.004	0.2525
TRAV6D-7	TRAJ45	0.0334	0.0655	0.0502	0.142	0.0243	0.2028	0.0497	0.0161	0.123	0.0907	0.0974	0.3313
TRAV6-6	TRAJ45	0	0.0246	0	0.0379	0.0972	0.0085	0.0082	0.0142	0.0479	0.0452	0.0557	0.092
TRAV6D-6	TRAJ45	0.0223	0.0246	0	0.0379	0	0.1014	0.0156	0.0136	0.0464	0.0512	0.0431	0.2533
TRAV6-4	TRAJ45	0	0.0082	0	0.0095	0.0365	0.0254	0.0027	0.0047	0.0238	0.0136	0.03	0.0383
TRAV6-3	TRAJ45	0	0	0	0.0095	0	0.0507	0	0	0.0201	0.027	0.0287	0.0984
TRAV6-2	TRAJ45	0	0	0	0.0095	0	0.0254	0	0	0.0116	0.0128	0.0166	0.0984
TRAV6-1	TRAJ45	0	0.0082	0	0	0.0243	0	0.0027	0.0047	0.0081	0.014	0.0077	0.5
TRAV6-5	TRAJ45	0.0223	0.0164	0.0084	0.0379	0.0243	0	0.0157	0.007	0.0207	0.0192	0.0071	0.3313
TRAV6D-5	TRAJ45	0	0.0246	0.0084	0.0189	0.0122	0	0.011	0.0125	0.0104	0.0096	-0.0009	0.4124
TRAV6-7/DV9	TRAJ45	0	0	0.0084	0	0	0	0.0028	0.0048	0	0	-0.004	0.2525
TRAV6-7/DV9	TRAJ47	0	0	0.0167	0	0	0	0.0056	0.0096	0	0	-0.0081	0.2525
TRAV6D-7	TRAJ48	0.0446	0.0655	0.067	0.0947	0.0729	0.2028	0.059	0.0125	0.1235	0.0696	0.0853	0.0404
TRAV6-6	TRAJ48	0	0.0164	0	0.0095	0.0608	0.0507	0.0055	0.0095	0.0403	0.0272	0.0491	0.092
TRAV6D-6	TRAJ48	0.0334	0.0573	0.0251	0.0284	0.0729	0.0592	0.0386	0.0167	0.0535	0.0228	0.0206	0.1914
TRAV6D-5	TRAJ48	0	0	0	0.0095	0.0243	0	0	0	0.0113	0.0122	0.0162	0.0984
TRAV6-5	TRAJ48	0.0223	0	0.0251	0.0189	0.0608	0	0.0158	0.0138	0.0266	0.0311	0.0153	0.4124
TRAV6D-4	TRAJ48	0	0	0	0.0189	0	0	0	0	0.0063	0.0109	0.0091	0.2525
TRAV6-1	TRAJ48	0	0.0164	0	0	0	0.0169	0.0055	0.0095	0.0056	0.0098	0.0001	0.5
TRAV6D-7	TRAJ49	0.1225	0.0983	0	0.1041	0.1823	0.1099	0.0736	0.0649	0.1321	0.0436	0.0765	0.1914
TRAV6-6	TRAJ49	0	0	0.0084	0.0189	0.0486	0.093	0.0028	0.0048	0.0535	0.0373	0.0712	0.0383
TRAV6D-6	TRAJ49	0.0111	0.0573	0.0586	0.0284	0.0365	0.1859	0.0423	0.0271	0.0836	0.0887	0.0561	0.5
TRAV6-2	TRAJ49	0.0111	0.0082	0	0	0.0365	0.0676	0.0064	0.0058	0.0347	0.0338	0.04	0.2533
TRAV6-3	TRAJ49	0	0.0082	0	0.0189	0.0243	0.0169	0.0027	0.0047	0.02	0.0038	0.0247	0.0383
TRAV6-4	TRAJ49	0	0.0082	0.0084	0.0189	0	0.0254	0.0055	0.0048	0.0148	0.0132	0.0133	0.2533
TRAV6D-5	TRAJ49	0	0.0328	0	0.0189	0.0122	0.0254	0.0109	0.0189	0.0188	0.0066	0.0112	0.329
TRAV6D-4	TRAJ49	0.0111	0.0164	0.0335	0	0.0729	0	0.0203	0.0117	0.0243	0.0421	0.0056	0.329
TRAV6-1	TRAJ49	0	0	0	0.0095	0	0	0	0	0.0032	0.0055	0.0046	0.2525
TRAV6-7/DV9	TRAJ49	0	0.0082	0	0	0	0	0.0027	0.0047	0	0	-0.0039	0.2525
TRAV6-5	TRAJ49	0.0334	0.0409	0.0418	0.0473	0.0365	0	0.0387	0.0046	0.0279	0.0248	-0.0151	0.5
TRAV6N-6	TRAJ49	0	0.0573	0.0084	0.0095	0	0	0.0219	0.0309	0.0032	0.0055	-0.0266	0.3214
TRAV6-6	TRAJ50	0	0	0	0.0095	0.0972	0	0	0	0.0356	0.0536	0.0505	0.0984
TRAV6D-7	TRAJ50	0.0446	0.1638	0.067	0.0757	0.1337	0.1437	0.0918	0.0634	0.1177	0.0367	0.0338	0.3313
TRAV6-3	TRAJ50	0	0	0	0.0284	0	0	0	0	0.0095	0.0164	0.0136	0.2525
TRAV6D-5	TRAJ50	0.0111	0.0082	0	0.0095	0.0365	0	0.0064	0.0058	0.0153	0.0189	0.0127	0.4124
TRAV6-4	TRAJ50	0	0	0	0	0	0.0254	0	0	0.0085	0.0147	0.0122	0.2525
TRAV6D-4	TRAJ50	0	0	0	0.0189	0	0	0	0	0.0063	0.0109	0.0091	0.2525
TRAV6-5	TRAJ50	0	0.0164	0	0.0095	0	0	0.0055	0.0095	0.0032	0.0055	-0.0033	0.5
TRAV6D-6	TRAJ50	0.0111	0.0655	0.0251	0.0095	0.0851	0	0.0339	0.0282	0.0315	0.0466	-0.0034	0.3313
TRAV6-7/DV9	TRAJ50	0.0111	0	0	0	0	0	0.0037	0.0064	0	0	-0.0053	0.2525
TRAV6D-7	TRAJ52	0.0223	0.0246	0.0753	0.0852	0.0365	0.1606	0.0407	0.03	0.0941	0.0625	0.0722	0.0952
TRAV6-6	TRAJ52	0	0.0082	0	0.0284	0.0608	0.0254	0.0027	0.0047	0.0382	0.0196	0.0502	0.0383
TRAV6-3	TRAJ52	0	0.0082	0	0.0189	0.0365	0.0254	0.0027	0.0047	0.0269	0.0089	0.0344	0.0383
TRAV6-2	TRAJ52	0	0	0	0.0095	0	0	0	0	0.0032	0.0055	0.0046	0.2525
TRAV6D-5	TRAJ52	0	0.0246	0	0	0	0	0.0082	0.0142	0	0	-0.0118	0.2525
TRAV6-5	TRAJ52	0.0111	0.0573	0	0.0095	0.0122	0.0085	0.0228	0.0304	0.0101	0.0019	-0.018	0.5
TRAV6N-6	TRAJ52	0.0223	0.0164	0	0	0	0	0.0129	0.0116	0	0	-0.0185	0.0984
TRAV6D-6	TRAJ52	0.0557	0.0328	0.0753	0.0095	0.0486	0.0338	0.0546	0.0213	0.0306	0.0197	-0.0332	0.1914
TRAV6-6	TRAJ53	0	0	0	0.0379	0	0	0	0	0.0126	0.0219	0.0181	0.2525
TRAV6D-7	TRAJ53	0.0557	0.0164	0.0335	0.0284	0.0729	0.0338	0.0352	0.0197	0.045	0.0243	0.0136	0.3313
TRAV6N-6	TRAJ53	0.0111	0	0	0.0095	0	0	0.0037	0.0064	0.0032	0.0055	-0.0007	0.5
TRAV6-5	TRAJ53	0.0111	0	0	0	0	0	0.0037	0.0064	0	0	-0.0053	0.2525
TRAV6D-6	TRAJ53	0.0446	0.0655	0	0	0.0851	0.0085	0.0367	0.0335	0.0312	0.0469	-0.0077	0.4124
TRAV6D-4	TRAJ53	0	0.0246	0	0	0	0	0.0082	0.0142	0	0	-0.0118	0.2525
TRAV6-6	TRAJ56	0	0.0164	0	0.0379	0.0365	0.0169	0.0055	0.0095	0.0304	0.0117	0.0353	0.0383
TRAV6D-7	TRAJ56	0.0557	0.0082	0.067	0.0568	0.0243	0.0845	0.0436	0.0312	0.0552	0.0301	0.0159	0.3313
TRAV6-3	TRAJ56	0	0	0	0	0	0.0254	0	0	0.0085	0.0147	0.0122	0.2525
TRAV6-4	TRAJ56	0	0.0082	0	0	0.0243	0	0.0027	0.0047	0.0081	0.014	0.0077	0.5
TRAV6-5	TRAJ56	0.0111	0	0.0084	0.0095	0	0.0254	0.0065	0.0058	0.0116	0.0128	0.0073	0.4124
TRAV6D-5	TRAJ56	0	0.0164	0	0.0095	0.0122	0	0.0055	0.0095	0.0072	0.0064	0.0024	0.5
TRAV6D-6	TRAJ56	0.1003	0	0	0.0189	0	0.0507	0.0334	0.0579	0.0232	0.0256	-0.0143	0.5
TRAV6N-6	TRAJ56	0.0111	0	0.0251	0	0	0	0.0121	0.0126	0	0	-0.0174	0.0984
TRAV6-6	TRAJ57	0	0.0164	0.0084	0	0.0365	0.0254	0.0083	0.0082	0.0206	0.0187	0.0175	0.2533
TRAV6D-7	TRAJ57	0.0223	0.0819	0.0418	0.0568	0.0243	0.1014	0.0487	0.0304	0.0608	0.0387	0.0166	0.3313
TRAV6D-5	TRAJ57	0	0.0328	0	0.0473	0	0	0.0109	0.0189	0.0158	0.0273	0.007	0.5
TRAV6D-4	TRAJ57	0	0	0	0.0095	0	0	0	0	0.0032	0.0055	0.0046	0.2525
TRAV6D-6	TRAJ57	0.0111	0	0.0251	0.0284	0.0122	0	0.0121	0.0126	0.0135	0.0142	0.002	0.4124
TRAV6-5	TRAJ57	0	0	0.0167	0.0095	0	0	0.0056	0.0096	0.0032	0.0055	-0.0034	0.5
TRAV6-7/DV9	TRAJ57	0	0.0082	0	0	0	0	0.0027	0.0047	0	0	-0.0039	0.2525
TRAV6-6	TRAJ58	0	0	0	0	0	0.0254	0	0	0.0085	0.0147	0.0122	0.2525
TRAV6D-6	TRAJ58	0.0223	0.0082	0	0.0095	0.0122	0.0085	0.0102	0.0113	0.0101	0.0019	-0.0001	0.3313
TRAV6D-7	TRAJ58	0.0111	0.0409	0	0.0095	0	0	0.0173	0.0212	0.0032	0.0055	-0.0201	0.1768
TRAV7D-5	TRAJ2	0	0.0082	0	0.0189	0.0243	0	0.0027	0.0047	0.0144	0.0128	0.0167	0.1768
TRAV7D-3	TRAJ2	0	0	0	0.0095	0	0	0	0	0.0032	0.0055	0.0046	0.2525
TRAV7-5	TRAJ2	0.0111	0	0	0.0189	0	0	0.0037	0.0064	0.0063	0.0109	0.0037	0.5
TRAV7D-4	TRAJ2	0.0111	0	0	0	0	0.0085	0.0037	0.0064	0.0028	0.0049	-0.0013	0.5
TRAV7-1	TRAJ2	0	0	0.0084	0	0	0	0.0028	0.0048	0	0	-0.004	0.2525
TRAV7D-2	TRAJ2	0.0111	0	0	0	0	0	0.0037	0.0064	0	0	-0.0053	0.2525
TRAV7N-4	TRAJ2	0.0223	0.0082	0.0084	0.0095	0	0.0085	0.013	0.0081	0.006	0.0052	-0.01	0.5
TRAV7-3	TRAJ2	0.0111	0.1228	0.0167	0.0189	0.0851	0.0085	0.0502	0.0629	0.0375	0.0415	-0.0176	0.5
TRAV7-4	TRAJ2	0.0223	0.0328	0.0167	0.0095	0	0.0169	0.0239	0.0082	0.0088	0.0085	-0.0214	0.0952
TRAV7D-6	TRAJ2	0	0	0.1004	0.0095	0	0.0085	0.0335	0.058	0.006	0.0052	-0.0389	0.5
TRAV7-2	TRAJ2	0.0223	0.0491	0.0335	0.0189	0	0	0.035	0.0135	0.0063	0.0109	-0.0406	0.0383
TRAV7N-5	TRAJ2	0.0557	0.0246	0.0586	0	0.0122	0.0085	0.0463	0.0188	0.0069	0.0063	-0.0554	0.0404
TRAV7D-3	TRAJ4	0.0223	0.0246	0.0335	0.0189	0.0608	0.0761	0.0268	0.0059	0.0519	0.0296	0.0348	0.3313
TRAV7D-5	TRAJ4	0	0	0	0.0095	0	0	0	0	0.0032	0.0055	0.0046	0.2525
TRAV7D-6	TRAJ4	0.0111	0	0	0	0	0	0.0037	0.0064	0	0	-0.0053	0.2525
TRAV7D-4	TRAJ4	0.0557	0	0.0167	0.0189	0.0243	0.0169	0.0241	0.0286	0.02	0.0038	-0.0058	0.3313
TRAV7D-2	TRAJ4	0.0223	0	0	0	0	0	0.0074	0.0129	0	0	-0.0106	0.2525
TRAV7N-4	TRAJ4	0.0334	0.0082	0	0.0095	0	0	0.0139	0.0174	0.0032	0.0055	-0.0153	0.3214
TRAV7N-5	TRAJ4	0.0557	0.0409	0.0251	0.0757	0	0.0085	0.0406	0.0153	0.0281	0.0415	-0.0174	0.3313
TRAV7-3	TRAJ4	0.0668	0.1065	0.0251	0.0284	0.0972	0.0254	0.0661	0.0407	0.0503	0.0406	-0.0215	0.5
TRAV7-5	TRAJ4	0.0223	0	0.1339	0.0189	0.0122	0.0169	0.0521	0.0717	0.016	0.0034	-0.0504	0.3313
TRAV7-4	TRAJ4	0.0557	0.0491	0.0502	0.0189	0	0.0254	0.0517	0.0035	0.0148	0.0132	-0.0515	0.0404
TRAV7-2	TRAJ4	0.156	0.131	0.0586	0.0284	0.0122	0.0169	0.1152	0.0506	0.0192	0.0083	-0.1299	0.0404
TRAV7-3	TRAJ5	0	0.0082	0	0.0284	0	0.0254	0.0027	0.0047	0.0179	0.0156	0.0217	0.1768
TRAV7D-4	TRAJ5	0.0111	0.0082	0.0084	0.0189	0	0.0169	0.0092	0.0016	0.0119	0.0104	0.0039	0.3313
TRAV7D-6	TRAJ5	0.0111	0	0	0	0	0	0.0037	0.0064	0	0	-0.0053	0.2525
TRAV7N-4	TRAJ5	0.0111	0	0.0084	0	0	0.0085	0.0065	0.0058	0.0028	0.0049	-0.0053	0.3214
TRAV7-4	TRAJ5	0.0334	0.0082	0	0.0189	0	0.0085	0.0139	0.0174	0.0091	0.0095	-0.0068	0.4124
TRAV7-1	TRAJ5	0.0223	0.0164	0.0251	0	0.0365	0.0085	0.0213	0.0044	0.015	0.0191	-0.0089	0.3313
TRAV7D-2	TRAJ5	0	0	0.0418	0	0	0	0.0139	0.0241	0	0	-0.0199	0.2525
TRAV7-5	TRAJ5	0.0111	0.0328	0	0	0	0	0.0146	0.0167	0	0	-0.0209	0.0984
TRAV7N-5	TRAJ5	0.0111	0.0491	0.0167	0.0189	0	0	0.0256	0.0205	0.0063	0.0109	-0.0274	0.1879
TRAV7D-3	TRAJ5	0.0334	0	0.0335	0	0	0	0.0223	0.0193	0	0	-0.0318	0.0984
TRAV7-2	TRAJ5	0.0111	0.1146	0.0837	0.0379	0	0.0085	0.0698	0.0531	0.0155	0.0199	-0.0752	0.0952
TRAV7D-5	TRAJ6	0	0	0	0.0189	0	0.0423	0	0	0.0204	0.0212	0.0291	0.0984
TRAV7D-3	TRAJ6	0.0334	0.1065	0.0084	0.0473	0.1459	0.0169	0.0494	0.051	0.07	0.0674	0.028	0.3313
TRAV7D-6	TRAJ6	0.0111	0	0	0	0	0	0.0037	0.0064	0	0	-0.0053	0.2525
TRAV7-3	TRAJ6	0.0111	0.0655	0.0586	0.0568	0	0.0254	0.0451	0.0296	0.0274	0.0285	-0.0246	0.1914
TRAV7-1	TRAJ6	0.0446	0.0082	0.0335	0.0095	0	0.0169	0.0288	0.0187	0.0088	0.0085	-0.0283	0.1914
TRAV7D-2	TRAJ6	0.0446	0.0164	0	0	0	0	0.0203	0.0226	0	0	-0.029	0.0984
TRAV7-4	TRAJ6	0.0557	0.0573	0.0335	0.0568	0.0122	0.0085	0.0488	0.0133	0.0258	0.0269	-0.032	0.1914
TRAV7N-4	TRAJ6	0.0446	0.0328	0.0084	0.0095	0	0.0085	0.0286	0.0185	0.006	0.0052	-0.0321	0.1914
TRAV7D-4	TRAJ6	0.0557	0.0491	0.0251	0	0	0.0254	0.0433	0.0161	0.0085	0.0147	-0.0489	0.092
TRAV7-5	TRAJ6	0	0.0655	0.0586	0.0095	0	0	0.0414	0.036	0.0032	0.0055	-0.0539	0.1768
TRAV7N-5	TRAJ6	0.1003	0.0246	0.0167	0	0.0122	0	0.0472	0.0462	0.0041	0.007	-0.0606	0.0383
TRAV7-2	TRAJ6	0.0334	0.0819	0.1841	0.0473	0.0122	0.0338	0.0998	0.0769	0.0311	0.0177	-0.0931	0.1914
TRAV7D-4	TRAJ7	0	0	0	0.0095	0	0	0	0	0.0032	0.0055	0.0046	0.2525
TRAV7N-4	TRAJ7	0	0	0.0251	0	0	0.0085	0.0084	0.0145	0.0028	0.0049	-0.008	0.5
TRAV7D-4	TRAJ9	0	0.0164	0.0167	0.1326	0.0122	0.0169	0.011	0.0096	0.0539	0.0682	0.06	0.1914
TRAV7-3	TRAJ9	0.1003	0.0819	0.1255	0.0757	0.2066	0.0676	0.1026	0.0219	0.1166	0.078	0.0182	0.3313
TRAV7-5	TRAJ9	0.0334	0.0246	0	0.0189	0.0729	0	0.0193	0.0173	0.0306	0.0378	0.0159	0.4124
TRAV7D-2	TRAJ9	0.0111	0	0	0	0.0365	0	0.0037	0.0064	0.0122	0.0211	0.0122	0.5
TRAV7-1	TRAJ9	0.0111	0.0164	0.0251	0.0284	0.0122	0.0254	0.0175	0.0071	0.022	0.0086	0.0064	0.1914
TRAV7D-3	TRAJ9	0.0111	0.0082	0.1088	0.0568	0.0365	0.0254	0.0427	0.0573	0.0396	0.0159	-0.0043	0.3313
TRAV7N-5	TRAJ9	0.0334	0	0.0251	0.0095	0	0.0085	0.0195	0.0174	0.006	0.0052	-0.0192	0.2533
TRAV7N-4	TRAJ9	0.0446	0.0164	0.0418	0.0284	0	0.0085	0.0343	0.0155	0.0123	0.0146	-0.031	0.0952
TRAV7-4	TRAJ9	0.1671	0.0655	0.0586	0.0852	0.0729	0.0254	0.0971	0.0607	0.0612	0.0316	-0.048	0.5
TRAV7D-6	TRAJ9	0.0334	0.0246	0.0753	0.0095	0	0.0085	0.0444	0.0271	0.006	0.0052	-0.054	0.0404
TRAV7-2	TRAJ9	0.1448	0.3275	0.2511	0.1136	0.0486	0.1183	0.2411	0.0918	0.0935	0.039	-0.1827	0.0404
TRAV7D-4	TRAJ11	0	0.0082	0	0.0568	0	0.0254	0.0027	0.0047	0.0274	0.0285	0.0351	0.1768
TRAV7-3	TRAJ11	0.0111	0	0.0251	0.0284	0.0365	0.0338	0.0121	0.0126	0.0329	0.0041	0.0293	0.0404
TRAV7-4	TRAJ11	0.0557	0.0246	0.0251	0.1136	0	0.0423	0.0351	0.0178	0.052	0.0574	0.0234	0.5
TRAV7D-5	TRAJ11	0	0.0082	0	0	0.0486	0	0.0027	0.0047	0.0162	0.0281	0.0193	0.5
TRAV7-6	TRAJ11	0	0	0	0.0189	0	0	0	0	0.0063	0.0109	0.0091	0.2525
TRAV7-5	TRAJ11	0.0111	0.0246	0.0084	0.0189	0.0122	0.0254	0.0147	0.0087	0.0188	0.0066	0.0058	0.1914
TRAV7N-4	TRAJ11	0	0	0	0.0095	0	0	0	0	0.0032	0.0055	0.0046	0.2525
TRAV7D-6	TRAJ11	0	0.0246	0	0	0.0122	0	0.0082	0.0142	0.0041	0.007	-0.0059	0.5
TRAV7D-3	TRAJ11	0.0223	0	0.0084	0.0095	0	0	0.0102	0.0113	0.0032	0.0055	-0.01	0.3214
TRAV7D-2	TRAJ11	0	0	0.0335	0	0	0.0085	0.0112	0.0193	0.0028	0.0049	-0.012	0.5
TRAV7-1	TRAJ11	0.0111	0.0246	0.0084	0	0	0	0.0147	0.0087	0	0	-0.0211	0.0318
TRAV7N-5	TRAJ11	0.0334	0.0246	0	0	0	0	0.0193	0.0173	0	0	-0.0276	0.0984
TRAV7-2	TRAJ11	0.0334	0.0983	0.1004	0.0189	0.0972	0.0169	0.0774	0.0381	0.0443	0.0458	-0.045	0.0952
TRAV7D-5	TRAJ12	0	0.0328	0.0084	0.0568	0.1094	0.0254	0.0137	0.017	0.0639	0.0424	0.0697	0.0952
TRAV7D-3	TRAJ12	0.0668	0.1392	0	0.1136	0.1216	0.1014	0.0687	0.0696	0.1122	0.0102	0.0576	0.3313
TRAV7-3	TRAJ12	0.0668	0.0819	0.1255	0.142	0.1094	0.1437	0.0914	0.0305	0.1317	0.0193	0.0523	0.0952
TRAV7D-4	TRAJ12	0.0223	0.0573	0.0167	0.0757	0.0729	0.0254	0.0321	0.022	0.058	0.0283	0.0358	0.0952
TRAV7-1	TRAJ12	0.0111	0.0164	0.0167	0.0473	0	0.0254	0.0147	0.0032	0.0242	0.0237	0.0134	0.3313
TRAV7-4	TRAJ12	0.2673	0.131	0.1172	0.1515	0.1945	0.1859	0.1718	0.083	0.1773	0.0228	0.0068	0.3313
TRAV7D-2	TRAJ12	0.0111	0	0	0.0095	0	0	0.0037	0.0064	0.0032	0.0055	-0.0007	0.5
TRAV7-6	TRAJ12	0	0.0246	0	0	0.0122	0	0.0082	0.0142	0.0041	0.007	-0.0059	0.5
TRAV7N-5	TRAJ12	0.0334	0.0491	0.0084	0.0379	0.0243	0	0.0303	0.0205	0.0207	0.0192	-0.0135	0.3313
TRAV7N-4	TRAJ12	0.1114	0.0409	0.067	0.0473	0.0122	0.0169	0.0731	0.0356	0.0255	0.0191	-0.0655	0.0952
TRAV7-5	TRAJ12	0.0446	0.0655	0.0753	0.0189	0.0122	0	0.0618	0.0157	0.0104	0.0096	-0.0716	0.0404
TRAV7D-6	TRAJ12	0.0891	0.0573	0.0335	0	0	0.0254	0.06	0.0279	0.0085	0.0147	-0.0719	0.0383
TRAV7-2	TRAJ12	0.3453	0.1883	0.159	0.1988	0.158	0.0676	0.2309	0.1002	0.1415	0.0671	-0.1088	0.1914
TRAV7D-3	TRAJ13	0.0446	0.0409	0.0251	0.1988	0.1459	0	0.0369	0.0104	0.1149	0.103	0.1046	0.3313
TRAV7-3	TRAJ13	0.0446	0.0819	0.0167	0.0947	0.1823	0.0761	0.0477	0.0327	0.1177	0.0567	0.0933	0.0952
TRAV7-4	TRAJ13	0.0668	0.0573	0.0837	0.142	0.0729	0.0761	0.0693	0.0134	0.097	0.039	0.0369	0.1914
TRAV7D-5	TRAJ13	0	0	0	0.0095	0.0243	0.0085	0	0	0.0141	0.0088	0.0202	0.0318
TRAV7-5	TRAJ13	0.0334	0.0328	0	0.0095	0.0243	0.0254	0.0221	0.0191	0.0197	0.0089	-0.0034	0.3313
TRAV7D-6	TRAJ13	0.0111	0.0082	0	0	0	0	0.0064	0.0058	0	0	-0.0092	0.0984
TRAV7N-5	TRAJ13	0.0334	0	0.0251	0.0284	0	0	0.0195	0.0174	0.0095	0.0164	-0.0142	0.3214
TRAV7-1	TRAJ13	0.0557	0.0082	0	0.0189	0.0122	0	0.0213	0.0301	0.0104	0.0096	-0.0155	0.4124
TRAV7D-4	TRAJ13	0.1448	0.0409	0.0084	0.0568	0.0243	0.0592	0.0647	0.0712	0.0468	0.0195	-0.0245	0.5
TRAV7D-2	TRAJ13	0	0.0246	0.0502	0	0	0	0.0249	0.0251	0	0	-0.0355	0.0984
TRAV7-2	TRAJ13	0.1337	0.1065	0.1255	0.0568	0.1823	0.0254	0.1219	0.014	0.0882	0.083	-0.044	0.3313
TRAV7N-4	TRAJ13	0.0668	0.0082	0.067	0.0189	0.0122	0	0.0473	0.0339	0.0104	0.0096	-0.0517	0.1914
TRAV7D-3	TRAJ15	0.078	0.0491	0.067	0.0947	0.1459	0.0676	0.0647	0.0146	0.1027	0.0398	0.0506	0.0952
TRAV7N-4	TRAJ15	0.0557	0.0246	0.0251	0.0757	0.0243	0.0169	0.0351	0.0178	0.039	0.032	0.0054	0.3313
TRAV7D-4	TRAJ15	0.1225	0.0491	0.0167	0.1041	0.0486	0.0423	0.0628	0.0542	0.065	0.034	0.003	0.5
TRAV7-1	TRAJ15	0.0111	0.0246	0.0502	0.0379	0	0.0507	0.0286	0.0199	0.0295	0.0264	0.0013	0.5
TRAV7D-5	TRAJ15	0	0.0082	0.0084	0.0189	0	0	0.0055	0.0048	0.0063	0.0109	0.0011	0.5
TRAV7N-5	TRAJ15	0.0334	0.0246	0.0418	0.0379	0	0.0085	0.0333	0.0086	0.0155	0.0199	-0.0251	0.1914
TRAV7D-6	TRAJ15	0.0111	0.0573	0.0502	0.0189	0	0.0085	0.0395	0.0249	0.0091	0.0095	-0.0428	0.0952
TRAV7-5	TRAJ15	0.1782	0.0491	0.0586	0.0568	0.0729	0.0423	0.0953	0.072	0.0573	0.0153	-0.0509	0.3313
TRAV7D-2	TRAJ15	0.0111	0.0819	0.0753	0	0.0486	0.0085	0.0561	0.0391	0.019	0.026	-0.0516	0.0952
TRAV7-3	TRAJ15	0.156	0.0737	0.1507	0.1231	0.0608	0.0761	0.1268	0.0461	0.0867	0.0325	-0.0523	0.1914
TRAV7-4	TRAJ15	0.1782	0.1146	0.1004	0.142	0.0243	0.093	0.1311	0.0414	0.0864	0.0591	-0.0582	0.1914
TRAV7-2	TRAJ15	0.7909	0.6142	0.5942	0.1136	0.4254	0.093	0.6664	0.1083	0.2107	0.1862	-0.4609	0.0404
TRAV7-1	TRAJ16	0	0	0	0.0189	0	0.0507	0	0	0.0232	0.0256	0.0331	0.0984
TRAV7-6	TRAJ16	0	0	0	0	0	0.0254	0	0	0.0085	0.0147	0.0122	0.2525
TRAV7D-4	TRAJ16	0.0223	0	0	0.0379	0	0.0085	0.0074	0.0129	0.0155	0.0199	0.0116	0.3214
TRAV7D-3	TRAJ16	0	0	0.0335	0.0379	0	0.0169	0.0112	0.0193	0.0183	0.019	0.0101	0.3214
TRAV7D-5	TRAJ16	0	0	0	0.0095	0	0	0	0	0.0032	0.0055	0.0046	0.2525
TRAV7-5	TRAJ16	0.0223	0.0246	0	0.0189	0.0122	0	0.0156	0.0136	0.0104	0.0096	-0.0074	0.2533
TRAV7-3	TRAJ16	0.0223	0.0082	0.0251	0.0095	0.0243	0	0.0185	0.0091	0.0113	0.0122	-0.0102	0.3313
TRAV7-4	TRAJ16	0.0557	0.0328	0	0.0568	0	0.0085	0.0295	0.028	0.0218	0.0306	-0.0108	0.4124
TRAV7N-4	TRAJ16	0.0223	0.0082	0	0	0	0	0.0102	0.0113	0	0	-0.0146	0.0984
TRAV7-2	TRAJ16	0.0334	0.0491	0.0251	0.0095	0.0365	0.0169	0.0359	0.0122	0.021	0.014	-0.0209	0.1914
TRAV7D-2	TRAJ16	0.0668	0	0	0.0095	0	0	0.0223	0.0386	0.0032	0.0055	-0.0272	0.5
TRAV7D-3	TRAJ17	0.0223	0.0246	0.0251	0.0189	0.0486	0.093	0.024	0.0015	0.0535	0.0373	0.041	0.3313
TRAV7D-5	TRAJ17	0	0	0	0.0284	0.0243	0.0254	0	0	0.026	0.0021	0.037	0.0318
TRAV7-3	TRAJ17	0.0334	0.0819	0.067	0.0568	0.1337	0.0169	0.0608	0.0248	0.0691	0.0594	0.0112	0.5
TRAV7-5	TRAJ17	0.0334	0.0901	0.0251	0.0189	0.1216	0.0169	0.0495	0.0354	0.0525	0.0599	0.0041	0.3313
TRAV7-1	TRAJ17	0.0334	0	0.0084	0.0284	0	0.0085	0.0139	0.0174	0.0123	0.0146	-0.0023	0.4124
TRAV7N-4	TRAJ17	0.0223	0	0.0084	0.0095	0.0122	0	0.0102	0.0113	0.0072	0.0064	-0.0043	0.4124
TRAV7D-4	TRAJ17	0.078	0.0491	0.0084	0.0663	0.0243	0.0338	0.0452	0.035	0.0415	0.022	-0.0051	0.5
TRAV7D-2	TRAJ17	0.0111	0	0	0	0	0	0.0037	0.0064	0	0	-0.0053	0.2525
TRAV7D-6	TRAJ17	0.0557	0.0164	0	0.0284	0	0	0.024	0.0286	0.0095	0.0164	-0.0206	0.3214
TRAV7N-5	TRAJ17	0.0446	0.0409	0.0251	0	0.0122	0	0.0369	0.0104	0.0041	0.007	-0.0464	0.0383
TRAV7-2	TRAJ17	0.1448	0.1965	0.1925	0.1136	0.1823	0.1183	0.1779	0.0288	0.1381	0.0384	-0.0496	0.0952
TRAV7-4	TRAJ17	0.1671	0.0573	0.0586	0.0568	0.0243	0.0338	0.0943	0.063	0.0383	0.0167	-0.0758	0.0404
TRAV7D-5	TRAJ18	0	0.0246	0	0.0663	0.1945	0	0.0082	0.0142	0.0869	0.0989	0.1084	0.1768
TRAV7-3	TRAJ18	0.078	0.1474	0.067	0.161	0.1702	0.1183	0.0975	0.0436	0.1498	0.0277	0.0672	0.0952
TRAV7D-3	TRAJ18	0.0111	0.0573	0.1088	0.0947	0.0608	0.1352	0.0591	0.0489	0.0969	0.0372	0.0506	0.1914
TRAV7D-4	TRAJ18	0.0334	0.0082	0.0084	0.0473	0.0122	0.0254	0.0167	0.0145	0.0283	0.0177	0.0164	0.1914
TRAV7-4	TRAJ18	0.1225	0.0409	0.0502	0.1231	0.0486	0.0592	0.0712	0.0447	0.077	0.0403	0.0078	0.3313
TRAV7-5	TRAJ18	0.0111	0.0246	0.0335	0.0284	0.0486	0	0.0231	0.0113	0.0257	0.0244	0.0037	0.5
TRAV7N-4	TRAJ18	0	0.0082	0.0084	0	0.0122	0.0085	0.0055	0.0048	0.0069	0.0063	0.002	0.2533
TRAV7-1	TRAJ18	0.0111	0.0246	0.0167	0.0284	0.0122	0.0085	0.0175	0.0068	0.0164	0.0106	-0.0016	0.5
TRAV7-6	TRAJ18	0.0111	0	0	0	0	0	0.0037	0.0064	0	0	-0.0053	0.2525
TRAV7D-2	TRAJ18	0.0557	0	0	0.0095	0	0	0.0186	0.0322	0.0032	0.0055	-0.022	0.5
TRAV7D-6	TRAJ18	0.0334	0.0246	0.067	0.0095	0.0122	0.0085	0.0417	0.0224	0.0101	0.0019	-0.0444	0.0404
TRAV7N-5	TRAJ18	0.0557	0.0246	0.0418	0.0095	0	0	0.0407	0.0156	0.0032	0.0055	-0.0529	0.0383
TRAV7-2	TRAJ18	0.1337	0.1802	0.1758	0.1041	0.0729	0.0254	0.1632	0.0257	0.0675	0.0396	-0.1239	0.0404
TRAV7-3	TRAJ21	0.0668	0.0737	0	0.2178	0.1094	0.1521	0.0468	0.0407	0.1598	0.0546	0.1479	0.0404
TRAV7D-3	TRAJ21	0.0223	0.0573	0	0.0473	0.1459	0.1014	0.0265	0.0289	0.0982	0.0494	0.0974	0.0952
TRAV7-1	TRAJ21	0.0557	0.0246	0.0251	0.0189	0.0243	0.0761	0.0351	0.0178	0.0398	0.0316	0.0065	0.3313
TRAV7-6	TRAJ21	0.0111	0	0	0	0	0	0.0037	0.0064	0	0	-0.0053	0.2525
TRAV7D-2	TRAJ21	0	0.0246	0	0	0	0	0.0082	0.0142	0	0	-0.0118	0.2525
TRAV7N-4	TRAJ21	0.0668	0	0.0251	0.0189	0	0.0254	0.0306	0.0337	0.0148	0.0132	-0.0223	0.4124
TRAV7D-4	TRAJ21	0.078	0.0328	0.0335	0.0568	0	0.0085	0.0481	0.0259	0.0218	0.0306	-0.0367	0.1914
TRAV7D-6	TRAJ21	0.0111	0.0573	0.0418	0	0.0122	0.0085	0.0367	0.0235	0.0069	0.0063	-0.0421	0.0952
TRAV7N-5	TRAJ21	0.0446	0.0246	0.0921	0.0095	0	0	0.0538	0.0347	0.0032	0.0055	-0.071	0.0383
TRAV7-5	TRAJ21	0.0223	0.0819	0.1255	0.0095	0.0122	0.0254	0.0766	0.0518	0.0157	0.0085	-0.084	0.0952
TRAV7-4	TRAJ21	0.1782	0.0983	0.2009	0.1231	0.0486	0.0676	0.1591	0.0539	0.0798	0.0387	-0.1022	0.0952
TRAV7-2	TRAJ21	0.2896	0.2784	0.2929	0.1515	0.1094	0.0254	0.287	0.0076	0.0954	0.0642	-0.2326	0.0404
TRAV7-3	TRAJ22	0.0891	0.0164	0.1758	0.1515	0.1702	0.2282	0.0938	0.0798	0.1833	0.04	0.1135	0.1914
TRAV7D-4	TRAJ22	0.1003	0.0328	0.0084	0.0852	0.0243	0.0423	0.0472	0.0476	0.0506	0.0313	0.0047	0.5
TRAV7D-3	TRAJ22	0.0446	0.0409	0	0.0095	0.0729	0.0085	0.0285	0.0248	0.0303	0.0369	0.0025	0.5
TRAV7N-4	TRAJ22	0.0668	0	0.0167	0.0473	0	0.0338	0.0278	0.0348	0.027	0.0244	-0.0011	0.4124
TRAV7D-5	TRAJ22	0	0	0.0084	0	0	0	0.0028	0.0048	0	0	-0.004	0.2525
TRAV7-6	TRAJ22	0.0111	0	0	0	0	0	0.0037	0.0064	0	0	-0.0053	0.2525
TRAV7-1	TRAJ22	0.0334	0.0246	0.0084	0	0	0.0085	0.0221	0.0127	0.0028	0.0049	-0.0275	0.092
TRAV7D-6	TRAJ22	0.0223	0.0328	0.0335	0.0095	0.0122	0	0.0295	0.0063	0.0072	0.0064	-0.0316	0.0404
TRAV7-5	TRAJ22	0.0446	0.0082	0.159	0.0189	0.0486	0.0676	0.0706	0.0787	0.045	0.0245	-0.0349	0.5
TRAV7D-2	TRAJ22	0.0891	0	0.0586	0.0189	0	0	0.0492	0.0453	0.0063	0.0109	-0.0602	0.1768
TRAV7-4	TRAJ22	0.2117	0.172	0.1339	0.1894	0.0365	0.0845	0.1725	0.0389	0.1035	0.0782	-0.0875	0.1914
TRAV7N-5	TRAJ22	0.1114	0.0573	0.1088	0.0473	0	0.0169	0.0925	0.0305	0.0214	0.024	-0.0971	0.0404
TRAV7-2	TRAJ22	0.3565	0.434	0.6277	0.0663	0.0486	0.1183	0.4727	0.1397	0.0777	0.0362	-0.4505	0.0404
TRAV7-3	TRAJ23	0.1114	0.0819	0.0921	0.2367	0.0851	0.4986	0.0951	0.015	0.2735	0.2092	0.2177	0.1914
TRAV7D-3	TRAJ23	0	0.0164	0.0251	0.1041	0.1459	0.1775	0.0138	0.0127	0.1425	0.0368	0.1724	0.0404
TRAV7-1	TRAJ23	0.0557	0.0082	0.0167	0.1041	0.1094	0.0592	0.0269	0.0253	0.0909	0.0276	0.0872	0.0404
TRAV7D-4	TRAJ23	0.078	0.0082	0.067	0.1326	0.0608	0.1099	0.0511	0.0375	0.1011	0.0367	0.067	0.1914
TRAV7D-5	TRAJ23	0.0446	0.0082	0	0.0095	0.0972	0.0338	0.0176	0.0237	0.0468	0.0453	0.0408	0.1914
TRAV7-4	TRAJ23	0.2228	0.0901	0.2009	0.4071	0.0243	0.1268	0.1713	0.0711	0.1861	0.1982	0.0181	0.5
TRAV7N-4	TRAJ23	0.0111	0.0082	0	0.0473	0	0	0.0064	0.0058	0.0158	0.0273	0.0134	0.5
TRAV7D-2	TRAJ23	0.0111	0.0246	0	0.0284	0.0122	0	0.0119	0.0123	0.0135	0.0142	0.0023	0.4124
TRAV7-6	TRAJ23	0.0223	0.0082	0.0335	0	0.0243	0	0.0213	0.0127	0.0081	0.014	-0.0188	0.1879
TRAV7D-6	TRAJ23	0.0557	0.0491	0.0418	0.0568	0	0	0.0489	0.007	0.0189	0.0328	-0.0419	0.329
TRAV7-2	TRAJ23	0.5124	0.262	0.4101	0.3882	0.1945	0.3042	0.3948	0.1259	0.2956	0.0971	-0.1064	0.1914
TRAV7-5	TRAJ23	0.2005	0.0983	0.0921	0.0947	0.0122	0.0085	0.1303	0.0609	0.0385	0.0487	-0.1222	0.0952
TRAV7N-5	TRAJ23	0.1003	0.0901	0.1758	0.0189	0.0122	0.0085	0.1221	0.0468	0.0132	0.0053	-0.1473	0.0404
TRAV7-4	TRAJ24	0.078	0.0164	0.0837	0.1515	0	0.0761	0.0594	0.0373	0.0759	0.0758	0.0223	0.5
TRAV7D-3	TRAJ24	0.0111	0	0	0.0095	0.0365	0.0085	0.0037	0.0064	0.0182	0.0159	0.0207	0.1879
TRAV7-1	TRAJ24	0.0111	0	0	0.0379	0	0	0.0037	0.0064	0.0126	0.0219	0.0127	0.5
TRAV7D-4	TRAJ24	0	0.0082	0.0084	0	0.0243	0.0085	0.0055	0.0048	0.0109	0.0123	0.0077	0.2533
TRAV7N-4	TRAJ24	0.0111	0	0	0.0095	0	0	0.0037	0.0064	0.0032	0.0055	-0.0007	0.5
TRAV7D-2	TRAJ24	0.0111	0	0	0.0095	0	0	0.0037	0.0064	0.0032	0.0055	-0.0007	0.5
TRAV7D-5	TRAJ24	0	0.0328	0	0	0.0122	0	0.0109	0.0189	0.0041	0.007	-0.0097	0.5
TRAV7-5	TRAJ24	0.0334	0	0.0753	0.0095	0	0	0.0362	0.0377	0.0032	0.0055	-0.0467	0.1768
TRAV7-3	TRAJ24	0.0111	0.0328	0.0921	0.0095	0.0122	0.0085	0.0453	0.0419	0.0101	0.0019	-0.0494	0.0952
TRAV7N-5	TRAJ24	0.0557	0.0246	0.0502	0.0095	0	0	0.0435	0.0166	0.0032	0.0055	-0.0568	0.0383
TRAV7-2	TRAJ24	0.1114	0.1146	0.1088	0.0189	0	0	0.1116	0.0029	0.0063	0.0109	-0.1436	0.0383
TRAV7D-5	TRAJ26	0	0.0164	0	0.0379	0.0729	0.1606	0.0055	0.0095	0.0905	0.0632	0.1171	0.0383
TRAV7N-4	TRAJ26	0.0111	0.0246	0.0084	0.0568	0.0243	0.0254	0.0147	0.0087	0.0355	0.0185	0.0293	0.0952
TRAV7D-3	TRAJ26	0.0334	0.0328	0.067	0.0379	0.0729	0.0845	0.0444	0.0196	0.0651	0.0243	0.0283	0.0952
TRAV7-1	TRAJ26	0.0111	0.0164	0.0335	0.0473	0.0365	0.0254	0.0203	0.0117	0.0364	0.011	0.0226	0.0952
TRAV7D-6	TRAJ26	0	0	0	0.0095	0	0	0	0	0.0032	0.0055	0.0046	0.2525
TRAV7-3	TRAJ26	0.156	0.0655	0.067	0.0947	0	0.1775	0.0962	0.0518	0.0907	0.0888	-0.0073	0.5
TRAV7D-4	TRAJ26	0.0557	0.0491	0.0251	0.0568	0	0.0338	0.0433	0.0161	0.0302	0.0286	-0.0182	0.5
TRAV7-4	TRAJ26	0.2785	0.1474	0.0837	0.1894	0.158	0.1099	0.1699	0.0993	0.1524	0.04	-0.0217	0.5
TRAV7-6	TRAJ26	0	0.0328	0.0335	0	0	0.0169	0.0221	0.0191	0.0056	0.0098	-0.0235	0.1768
TRAV7D-2	TRAJ26	0.0668	0	0.0418	0	0	0	0.0362	0.0338	0	0	-0.0513	0.0984
TRAV7N-5	TRAJ26	0.0334	0.0655	0.0586	0.0095	0	0	0.0525	0.0169	0.0032	0.0055	-0.0692	0.0383
TRAV7-2	TRAJ26	0.2339	0.1474	0.2511	0.1041	0.1337	0.0338	0.2108	0.0556	0.0905	0.0513	-0.151	0.0404
TRAV7-5	TRAJ26	0.1225	0.172	0.1841	0.0189	0	0.0507	0.1595	0.0326	0.0232	0.0256	-0.1804	0.0404
TRAV7-3	TRAJ27	0.1225	0.1638	0.1088	0.2178	0.3282	0.2873	0.1317	0.0286	0.2778	0.0558	0.1752	0.0404
TRAV7-1	TRAJ27	0	0.0328	0.0167	0.0284	0.0243	0.0676	0.0165	0.0164	0.0401	0.0239	0.0331	0.1914
TRAV7D-5	TRAJ27	0	0	0	0.0284	0.0365	0	0	0	0.0216	0.0192	0.0308	0.0984
TRAV7D-3	TRAJ27	0.0334	0.0164	0.0418	0.0757	0.0243	0.0423	0.0305	0.0129	0.0474	0.0261	0.0235	0.1914
TRAV7D-4	TRAJ27	0	0.0328	0.0502	0.0852	0.0243	0.0085	0.0277	0.0255	0.0393	0.0405	0.0162	0.5
TRAV7N-4	TRAJ27	0.0334	0.0164	0.0251	0.0284	0.0243	0.0254	0.025	0.0085	0.026	0.0021	0.0014	0.5
TRAV7-6	TRAJ27	0.0223	0	0.0084	0	0	0	0.0102	0.0113	0	0	-0.0146	0.0984
TRAV7D-6	TRAJ27	0.0223	0	0.0335	0	0	0	0.0186	0.0171	0	0	-0.0266	0.0984
TRAV7D-2	TRAJ27	0.0111	0.0246	0.0502	0	0	0.0085	0.0286	0.0199	0.0028	0.0049	-0.0366	0.0383
TRAV7-5	TRAJ27	0.078	0.0901	0.1339	0.0568	0.0851	0.0761	0.1007	0.0294	0.0727	0.0145	-0.0372	0.0952
TRAV7-4	TRAJ27	0.4122	0.1392	0.1339	0.3124	0.1337	0.0761	0.2284	0.1592	0.1741	0.1232	-0.0652	0.1914
TRAV7N-5	TRAJ27	0.0557	0.0409	0.1172	0	0.0122	0	0.0713	0.0405	0.0041	0.007	-0.0935	0.0383
TRAV7-2	TRAJ27	0.401	0.2129	0.385	0.1136	0.2917	0.0423	0.333	0.1043	0.1492	0.1285	-0.214	0.0952
TRAV7-3	TRAJ28	0.0223	0.0328	0	0.0473	0.1216	0	0.0184	0.0168	0.0563	0.0613	0.0527	0.2533
TRAV7D-4	TRAJ28	0	0	0	0.0568	0	0	0	0	0.0189	0.0328	0.027	0.2525
TRAV7D-3	TRAJ28	0.0111	0.0246	0	0.0284	0.0365	0	0.0119	0.0123	0.0216	0.0192	0.0138	0.2533
TRAV7N-4	TRAJ28	0	0.0082	0	0.0284	0	0	0.0027	0.0047	0.0095	0.0164	0.0098	0.5
TRAV7-5	TRAJ28	0	0	0	0	0.0122	0	0	0	0.0041	0.007	0.0059	0.2525
TRAV7N-5	TRAJ28	0	0	0	0.0095	0	0	0	0	0.0032	0.0055	0.0046	0.2525
TRAV7-4	TRAJ28	0.1003	0.0573	0.0335	0.0947	0.0608	0.0254	0.0637	0.0339	0.0603	0.0347	-0.0046	0.5
TRAV7-2	TRAJ28	0.078	0.0491	0.0335	0.0473	0.0365	0	0.0535	0.0226	0.0279	0.0248	-0.0355	0.1914
TRAV7N-4	TRAJ30	0.0334	0	0	0.1231	0	0.0254	0.0111	0.0193	0.0495	0.065	0.0538	0.3214
TRAV7D-2	TRAJ30	0.0111	0.1228	0.0084	0.0095	0.0486	0.1268	0.0474	0.0653	0.0616	0.0597	0.0194	0.3313
TRAV7-1	TRAJ30	0.0223	0.0082	0.0084	0.0568	0	0.0169	0.013	0.0081	0.0246	0.0292	0.0164	0.5
TRAV7D-4	TRAJ30	0.0557	0.0409	0.0084	0.0757	0.0122	0.0507	0.035	0.0242	0.0462	0.032	0.0155	0.3313
TRAV7D-5	TRAJ30	0.0111	0.0082	0	0	0.0243	0.0254	0.0064	0.0058	0.0166	0.0144	0.0145	0.2533
TRAV7D-3	TRAJ30	0.0668	0.0573	0.0335	0.0189	0.0486	0.0676	0.0525	0.0172	0.045	0.0245	-0.0103	0.5
TRAV7-6	TRAJ30	0.0223	0	0.0251	0	0	0.0085	0.0158	0.0138	0.0028	0.0049	-0.0186	0.1768
TRAV7D-6	TRAJ30	0.0223	0.0164	0.0251	0	0	0.0085	0.0213	0.0044	0.0028	0.0049	-0.0264	0.0383
TRAV7-3	TRAJ30	0.1448	0.1228	0.2762	0.1704	0.0608	0.1775	0.1813	0.0829	0.1362	0.0654	-0.0562	0.5
TRAV7N-5	TRAJ30	0.1225	0.0737	0.0084	0.0189	0.0243	0.0085	0.0682	0.0572	0.0172	0.008	-0.0706	0.3313
TRAV7-5	TRAJ30	0.0557	0.0655	0.2762	0.0473	0.0851	0.0169	0.1325	0.1246	0.0498	0.0342	-0.1094	0.1914
TRAV7-4	TRAJ30	0.1225	0.1556	0.1925	0.1041	0.0729	0.0338	0.1569	0.035	0.0703	0.0352	-0.1122	0.0404
TRAV7-2	TRAJ30	0.2785	0.1883	0.4436	0.2272	0.158	0.1268	0.3035	0.1295	0.1707	0.0514	-0.155	0.0952
TRAV7-3	TRAJ31	0.2005	0.2784	0.2009	0.2746	0.3039	0.2535	0.2266	0.0449	0.2773	0.0253	0.0584	0.1914
TRAV7N-4	TRAJ31	0.0557	0.0164	0.0084	0.0663	0.0365	0.0254	0.0268	0.0253	0.0427	0.0212	0.0222	0.1914
TRAV7D-3	TRAJ31	0.0446	0.0164	0.0586	0.0852	0.0486	0.0254	0.0399	0.0215	0.0531	0.0301	0.0182	0.3313
TRAV7D-2	TRAJ31	0.0111	0	0	0.0095	0	0.0338	0.0037	0.0064	0.0144	0.0174	0.0153	0.3214
TRAV7D-5	TRAJ31	0	0.0082	0	0.0095	0	0.0254	0.0027	0.0047	0.0116	0.0128	0.0127	0.1768
TRAV7D-4	TRAJ31	0.1225	0.0246	0.0084	0.0947	0.0365	0.0254	0.0518	0.0617	0.0522	0.0372	0.0005	0.3313
TRAV7-4	TRAJ31	0.3008	0.2457	0.1339	0.3219	0.1459	0.1606	0.2268	0.085	0.2095	0.0976	-0.0205	0.5
TRAV7-1	TRAJ31	0.0111	0.0737	0.0335	0.0189	0.0122	0.0338	0.0394	0.0317	0.0216	0.0111	-0.0249	0.5
TRAV7D-6	TRAJ31	0.0223	0.0246	0.0753	0	0.0122	0.0085	0.0407	0.03	0.0069	0.0063	-0.0476	0.0404
TRAV7-6	TRAJ31	0.0891	0.0164	0.0502	0.0473	0	0	0.0519	0.0364	0.0158	0.0273	-0.0504	0.092
TRAV7N-5	TRAJ31	0.0446	0.0573	0.0753	0	0.0122	0.0085	0.0591	0.0154	0.0069	0.0063	-0.0729	0.0404
TRAV7-5	TRAJ31	0.1671	0.1228	0.1758	0.142	0.0122	0.0592	0.1552	0.0284	0.0711	0.0657	-0.109	0.0952
TRAV7-2	TRAJ31	0.3676	0.4586	0.2762	0.1136	0.1094	0.1099	0.3675	0.0912	0.111	0.0023	-0.2997	0.0404
TRAV7-3	TRAJ32	0.0557	0.0573	0.0251	0.1041	0.1702	0.1775	0.046	0.0181	0.1506	0.0404	0.1375	0.0404
TRAV7D-3	TRAJ32	0	0.0082	0	0.0473	0.0608	0.0254	0.0027	0.0047	0.0445	0.0179	0.0589	0.0383
TRAV7N-4	TRAJ32	0.0111	0.0164	0	0.0473	0.0608	0	0.0092	0.0084	0.036	0.0319	0.0378	0.2533
TRAV7-1	TRAJ32	0.0223	0.0082	0	0.0189	0.0486	0.0423	0.0102	0.0113	0.0366	0.0156	0.0372	0.0952
TRAV7D-4	TRAJ32	0	0.0082	0	0.0189	0.0122	0.0254	0.0027	0.0047	0.0188	0.0066	0.023	0.0383
TRAV7-5	TRAJ32	0.0334	0.1146	0.0251	0.0379	0.1459	0.0085	0.0577	0.0495	0.0641	0.0723	0.0087	0.5
TRAV7-4	TRAJ32	0.1337	0.0491	0.0586	0.1704	0.0608	0.0254	0.0805	0.0463	0.0855	0.0756	0.0067	0.5
TRAV7D-2	TRAJ32	0	0	0	0.0095	0	0	0	0	0.0032	0.0055	0.0046	0.2525
TRAV7D-5	TRAJ32	0.0334	0	0	0	0	0.0254	0.0111	0.0193	0.0085	0.0147	-0.0037	0.5
TRAV7N-5	TRAJ32	0.0111	0.0246	0	0.0095	0	0.0169	0.0119	0.0123	0.0088	0.0085	-0.0044	0.4124
TRAV7-6	TRAJ32	0.0223	0	0	0.0095	0	0	0.0074	0.0129	0.0032	0.0055	-0.006	0.5
TRAV7-2	TRAJ32	0.078	0.0819	0.1088	0.0379	0.0851	0.0592	0.0896	0.0168	0.0607	0.0236	-0.0388	0.1914
TRAV7D-6	TRAJ32	0.0223	0.0409	0.0418	0.0095	0.0122	0	0.035	0.011	0.0072	0.0064	-0.0393	0.0404
TRAV7-3	TRAJ33	0.0446	0.0328	0.0586	0.0473	0.0972	0.1183	0.0453	0.0129	0.0876	0.0365	0.0572	0.0952
TRAV7N-4	TRAJ33	0	0	0	0.0473	0.0243	0	0	0	0.0239	0.0237	0.0341	0.0984
TRAV7-1	TRAJ33	0.0223	0	0	0.0379	0.0365	0.0085	0.0074	0.0129	0.0276	0.0166	0.0286	0.092
TRAV7D-3	TRAJ33	0.0111	0	0.0251	0.0189	0.0243	0.0254	0.0121	0.0126	0.0229	0.0035	0.0153	0.1914
TRAV7D-4	TRAJ33	0.0334	0.0164	0.0084	0.0473	0	0.0085	0.0194	0.0128	0.0186	0.0252	-0.0011	0.5
TRAV7-4	TRAJ33	0.1114	0.0737	0.0502	0.161	0	0.0592	0.0784	0.0309	0.0734	0.0814	-0.0067	0.5
TRAV7-6	TRAJ33	0	0	0.0251	0	0	0	0.0084	0.0145	0	0	-0.0121	0.2525
TRAV7N-5	TRAJ33	0.0111	0.0246	0	0	0	0	0.0119	0.0123	0	0	-0.0171	0.0984
TRAV7D-2	TRAJ33	0	0	0.0502	0	0	0	0.0167	0.029	0	0	-0.0239	0.2525
TRAV7D-6	TRAJ33	0.0111	0	0.0586	0	0	0.0085	0.0232	0.0311	0.0028	0.0049	-0.0291	0.1768
TRAV7-2	TRAJ33	0.1448	0.0901	0.067	0.0473	0.0729	0.0592	0.1006	0.04	0.0598	0.0128	-0.0545	0.0952
TRAV7-5	TRAJ33	0.0668	0.0491	0.0502	0.0189	0	0	0.0554	0.0099	0.0063	0.0109	-0.0687	0.0383
TRAV7-3	TRAJ34	0.0557	0.0491	0.0586	0.0663	0.1216	0.0761	0.0545	0.0049	0.088	0.0295	0.0451	0.0404
TRAV7-2	TRAJ34	0.1448	0.0819	0.0921	0.1988	0.1216	0.0761	0.1063	0.0338	0.1322	0.062	0.0334	0.5
TRAV7D-5	TRAJ34	0	0	0	0	0.0243	0.0254	0	0	0.0166	0.0144	0.0238	0.0984
TRAV7D-3	TRAJ34	0.0668	0.0246	0.0084	0.0852	0.0486	0.0169	0.0333	0.0301	0.0502	0.0342	0.0234	0.3313
TRAV7N-4	TRAJ34	0.0223	0.0164	0	0.0473	0.0122	0.0169	0.0129	0.0116	0.0255	0.0191	0.0178	0.3313
TRAV7-1	TRAJ34	0.0111	0.0409	0	0.0189	0.0486	0.0085	0.0173	0.0212	0.0253	0.0208	0.0113	0.3313
TRAV7D-4	TRAJ34	0.0557	0.0246	0.0167	0.0663	0.0122	0.0254	0.0323	0.0206	0.0346	0.0282	0.0032	0.5
TRAV7-6	TRAJ34	0	0.0491	0	0.0379	0.0122	0	0.0164	0.0283	0.0167	0.0193	0.0004	0.5
TRAV7D-2	TRAJ34	0.0111	0	0	0	0	0	0.0037	0.0064	0	0	-0.0053	0.2525
TRAV7-4	TRAJ34	0.2005	0.1228	0.0586	0.1326	0.0851	0.1099	0.1273	0.0711	0.1092	0.0238	-0.0234	0.5
TRAV7D-6	TRAJ34	0.0223	0	0.0502	0.0095	0	0	0.0242	0.0252	0.0032	0.0055	-0.0299	0.1768
TRAV7N-5	TRAJ34	0.0334	0.0328	0.1004	0.0095	0	0	0.0555	0.0389	0.0032	0.0055	-0.0733	0.0383
TRAV7-5	TRAJ34	0.1225	0.0819	0.0502	0.0284	0.0486	0	0.0849	0.0362	0.0257	0.0244	-0.081	0.0404
TRAV7D-4	TRAJ35	0	0.0082	0	0.0473	0.0365	0.0761	0.0027	0.0047	0.0533	0.0205	0.071	0.0383
TRAV7-3	TRAJ35	0	0	0	0.0379	0	0.0761	0	0	0.038	0.0381	0.0538	0.0984
TRAV7-1	TRAJ35	0	0	0	0.0284	0	0.0169	0	0	0.0151	0.0143	0.0216	0.0984
TRAV7-4	TRAJ35	0.0111	0.0164	0	0.0379	0.0243	0.0085	0.0092	0.0084	0.0236	0.0147	0.0204	0.1914
TRAV7N-4	TRAJ35	0	0	0	0.0284	0	0	0	0	0.0095	0.0164	0.0136	0.2525
TRAV7-5	TRAJ35	0	0	0.0335	0.0379	0.0243	0	0.0112	0.0193	0.0207	0.0192	0.0135	0.3214
TRAV7D-3	TRAJ35	0	0.0246	0.0251	0.0189	0.0122	0.0254	0.0166	0.0143	0.0188	0.0066	0.0031	0.5
TRAV7-2	TRAJ35	0.0111	0	0	0.0095	0	0	0.0037	0.0064	0.0032	0.0055	-0.0007	0.5
TRAV7D-6	TRAJ35	0	0	0.0251	0	0	0.0085	0.0084	0.0145	0.0028	0.0049	-0.008	0.5
TRAV7D-2	TRAJ35	0.0223	0	0	0	0	0	0.0074	0.0129	0	0	-0.0106	0.2525
TRAV7-6	TRAJ35	0.0223	0	0	0	0	0	0.0074	0.0129	0	0	-0.0106	0.2525
TRAV7-3	TRAJ37	0.0557	0.0655	0.0251	0.1231	0.0122	0.1775	0.0488	0.0211	0.1043	0.0842	0.0744	0.3313
TRAV7D-3	TRAJ37	0.0334	0.0082	0	0.0568	0.0729	0.0507	0.0139	0.0174	0.0601	0.0115	0.0643	0.0404
TRAV7-1	TRAJ37	0	0.0164	0	0.0473	0.0365	0.0085	0.0055	0.0095	0.0308	0.02	0.0359	0.092
TRAV7D-5	TRAJ37	0	0	0	0	0	0.0254	0	0	0.0085	0.0147	0.0122	0.2525
TRAV7D-2	TRAJ37	0.0223	0	0	0.0284	0	0.0085	0.0074	0.0129	0.0123	0.0146	0.007	0.3214
TRAV7N-4	TRAJ37	0.0111	0	0.0502	0.0379	0.0122	0.0254	0.0204	0.0264	0.0252	0.0129	0.0068	0.3313
TRAV7D-4	TRAJ37	0.1003	0.0491	0.0167	0.1041	0.0122	0.0507	0.0554	0.0422	0.0557	0.0462	0.0004	0.5
TRAV7N-5	TRAJ37	0	0.0328	0	0	0	0	0.0109	0.0189	0	0	-0.0156	0.2525
TRAV7-6	TRAJ37	0.0223	0.0328	0.0335	0.0095	0.0122	0.0085	0.0295	0.0063	0.0101	0.0019	-0.0274	0.0404
TRAV7-5	TRAJ37	0.1003	0.131	0.067	0.0568	0.0608	0.0423	0.0994	0.032	0.0533	0.0097	-0.0618	0.0404
TRAV7D-6	TRAJ37	0.0668	0.0328	0.0502	0	0	0	0.0499	0.017	0	0	-0.0703	0.0318
TRAV7-4	TRAJ37	0.2451	0.1392	0.1255	0.2083	0.0608	0.0676	0.1699	0.0655	0.1122	0.0833	-0.073	0.1914
TRAV7-2	TRAJ37	0.323	0.1802	0.318	0.0947	0.0972	0.0676	0.2737	0.081	0.0865	0.0164	-0.2293	0.0404
TRAV7D-3	TRAJ38	0	0	0	0.0095	0.0365	0.0592	0	0	0.0351	0.0249	0.0498	0.0318
TRAV7-3	TRAJ38	0.0111	0	0.0251	0.0284	0.0243	0.0254	0.0121	0.0126	0.026	0.0021	0.0197	0.0952
TRAV7-1	TRAJ38	0	0.0082	0	0.0095	0	0.0254	0.0027	0.0047	0.0116	0.0128	0.0127	0.1768
TRAV7D-4	TRAJ38	0	0	0.0084	0	0.0122	0.0169	0.0028	0.0048	0.0097	0.0087	0.0099	0.1768
TRAV7D-5	TRAJ38	0	0	0	0.0189	0	0	0	0	0.0063	0.0109	0.0091	0.2525
TRAV7-5	TRAJ38	0	0	0	0.0189	0	0	0	0	0.0063	0.0109	0.0091	0.2525
TRAV7-4	TRAJ38	0.0111	0.0082	0	0.0284	0	0	0.0064	0.0058	0.0095	0.0164	0.0044	0.5
TRAV7N-4	TRAJ38	0	0	0	0	0	0.0085	0	0	0.0028	0.0049	0.004	0.2525
TRAV7-6	TRAJ38	0.0111	0	0	0	0	0	0.0037	0.0064	0	0	-0.0053	0.2525
TRAV7D-6	TRAJ38	0	0.0246	0.0084	0	0.0122	0	0.011	0.0125	0.0041	0.007	-0.0099	0.3214
TRAV7-2	TRAJ38	0.0334	0.0491	0.0167	0.0189	0	0.0423	0.0331	0.0162	0.0204	0.0212	-0.0178	0.3313
TRAV7-3	TRAJ39	0.0223	0.0164	0.0418	0.0663	0.1216	0.1099	0.0268	0.0133	0.0993	0.0291	0.0984	0.0404
TRAV7-4	TRAJ39	0.0557	0.0573	0.0418	0.1515	0.0486	0.0761	0.0516	0.0085	0.0921	0.0533	0.0545	0.1914
TRAV7D-3	TRAJ39	0.0334	0	0	0	0.0851	0.0254	0.0111	0.0193	0.0368	0.0437	0.0362	0.3214
TRAV7D-4	TRAJ39	0.0111	0	0	0.0473	0	0.0254	0.0037	0.0064	0.0242	0.0237	0.0292	0.1768
TRAV7-1	TRAJ39	0.0111	0	0	0.0095	0.0365	0.0254	0.0037	0.0064	0.0238	0.0136	0.0286	0.092
TRAV7N-4	TRAJ39	0	0	0	0.0284	0.0122	0.0085	0	0	0.0164	0.0106	0.0235	0.0318
TRAV7-6	TRAJ39	0.0334	0.0246	0.0251	0.0095	0.0365	0.0761	0.0277	0.0049	0.0407	0.0335	0.0181	0.3313
TRAV7D-6	TRAJ39	0.0223	0.0082	0	0	0.0122	0	0.0102	0.0113	0.0041	0.007	-0.0087	0.3214
TRAV7N-5	TRAJ39	0.0111	0	0.0418	0.0189	0	0.0085	0.0176	0.0217	0.0091	0.0095	-0.0121	0.4124
TRAV7D-2	TRAJ39	0.0334	0	0	0	0	0	0.0111	0.0193	0	0	-0.0159	0.2525
TRAV7-5	TRAJ39	0.0557	0.0246	0.0502	0.0189	0.0122	0.0338	0.0435	0.0166	0.0216	0.0111	-0.0306	0.0952
TRAV7-2	TRAJ39	0.0446	0.2129	0.1507	0.0284	0.2309	0.0423	0.1361	0.0851	0.1005	0.1131	-0.0459	0.3313
TRAV7-3	TRAJ40	0.0446	0.0246	0.0167	0.1041	0.0729	0.0761	0.0286	0.0144	0.0844	0.0172	0.0762	0.0404
TRAV7N-4	TRAJ40	0.0111	0.0082	0	0.0284	0.0243	0.0338	0.0064	0.0058	0.0288	0.0048	0.0318	0.0404
TRAV7D-3	TRAJ40	0.0446	0	0	0.0568	0	0.0338	0.0149	0.0257	0.0302	0.0286	0.0216	0.3214
TRAV7D-4	TRAJ40	0.0446	0.0409	0.0418	0.0757	0.0729	0.0254	0.0424	0.0019	0.058	0.0283	0.0214	0.3313
TRAV7D-5	TRAJ40	0	0	0	0.0189	0	0.0254	0	0	0.0148	0.0132	0.0212	0.0984
TRAV7-4	TRAJ40	0.078	0.0655	0.1088	0.1231	0.0729	0.0761	0.0841	0.0223	0.0907	0.0281	0.0088	0.5
TRAV7-1	TRAJ40	0	0.0246	0.0167	0.0095	0.0243	0.0085	0.0138	0.0126	0.0141	0.0088	0.0004	0.5
TRAV7-6	TRAJ40	0.0111	0.0246	0	0.0189	0.0122	0	0.0119	0.0123	0.0104	0.0096	-0.0021	0.4124
TRAV7N-5	TRAJ40	0.0111	0	0	0	0	0	0.0037	0.0064	0	0	-0.0053	0.2525
TRAV7D-2	TRAJ40	0.0111	0.0246	0.0084	0	0.0243	0	0.0147	0.0087	0.0081	0.014	-0.0094	0.1879
TRAV7D-6	TRAJ40	0	0	0.0502	0.0284	0	0	0.0167	0.029	0.0095	0.0164	-0.0103	0.5
TRAV7-2	TRAJ40	0.078	0.131	0.1758	0.1136	0.1945	0.0338	0.1283	0.049	0.114	0.0804	-0.0184	0.5
TRAV7-5	TRAJ40	0.1114	0.2702	0.1004	0.1041	0.0486	0.0676	0.1607	0.095	0.0734	0.0282	-0.1128	0.0952
TRAV7D-4	TRAJ42	0.0111	0.0082	0.0084	0.0947	0.0122	0.0338	0.0092	0.0016	0.0469	0.0428	0.0529	0.0404
TRAV7D-3	TRAJ42	0.0557	0.0082	0.0586	0.0473	0.0486	0.093	0.0408	0.0283	0.063	0.026	0.0304	0.5
TRAV7N-4	TRAJ42	0	0.0164	0	0.0473	0.0122	0.0085	0.0055	0.0095	0.0227	0.0214	0.0245	0.1879
TRAV7-6	TRAJ42	0.0111	0.0573	0.0084	0.0189	0.0243	0.0592	0.0256	0.0275	0.0341	0.0219	0.0119	0.1914
TRAV7-3	TRAJ42	0.1225	0.1392	0.0335	0.0852	0.0972	0.093	0.0984	0.0568	0.0918	0.0061	-0.0087	0.3313
TRAV7-1	TRAJ42	0	0.0164	0.0251	0.0095	0	0	0.0138	0.0127	0.0032	0.0055	-0.0152	0.1768
TRAV7-4	TRAJ42	0.1114	0.0246	0.0084	0.0663	0.0243	0.0169	0.0481	0.0554	0.0358	0.0266	-0.017	0.5
TRAV7-5	TRAJ42	0.0446	0.0655	0.0251	0.0189	0.0122	0	0.0451	0.0202	0.0104	0.0096	-0.0487	0.0404
TRAV7-2	TRAJ42	0.1114	0.131	0.2343	0.0568	0.1094	0.0254	0.1589	0.066	0.0639	0.0424	-0.1234	0.0404
TRAV7N-4	TRAJ43	0	0	0	0.1326	0	0.0254	0	0	0.0527	0.0704	0.0741	0.0984
TRAV7D-5	TRAJ43	0	0.0082	0	0.0095	0.0851	0	0.0027	0.0047	0.0315	0.0466	0.0409	0.1768
TRAV7-3	TRAJ43	0.0223	0.0655	0	0.0757	0.0486	0.0507	0.0293	0.0333	0.0583	0.0151	0.0401	0.1914
TRAV7-1	TRAJ43	0	0.0082	0.0084	0.0568	0	0.0085	0.0055	0.0048	0.0218	0.0306	0.0232	0.2533
TRAV7D-3	TRAJ43	0.0111	0.0491	0.0251	0.0189	0.0486	0.0592	0.0284	0.0192	0.0422	0.0209	0.0192	0.3313
TRAV7D-4	TRAJ43	0.0668	0	0.0418	0.0757	0	0.0423	0.0362	0.0338	0.0393	0.0379	0.0043	0.4124
TRAV7-2	TRAJ43	0.0223	0.131	0.0251	0.0568	0.0851	0.0423	0.0595	0.062	0.0614	0.0218	0.0026	0.3313
TRAV7-4	TRAJ43	0.0446	0.0328	0.0084	0.0568	0	0.0169	0.0286	0.0185	0.0246	0.0292	-0.0056	0.5
TRAV7D-6	TRAJ43	0.0111	0	0.0167	0	0	0	0.0093	0.0085	0	0	-0.0134	0.0984
TRAV7-5	TRAJ43	0.0223	0.0246	0.0502	0.0284	0	0	0.0324	0.0155	0.0095	0.0164	-0.0324	0.1879
TRAV7-6	TRAJ43	0.0446	0.0573	0.0502	0.0095	0.0365	0.0254	0.0507	0.0064	0.0238	0.0136	-0.0374	0.0404
TRAV7N-5	TRAJ43	0.0334	0	0.0586	0	0	0.0085	0.0307	0.0294	0.0028	0.0049	-0.0396	0.1768
TRAV7-2	TRAJ44	0	0	0	0	0.0365	0	0	0	0.0122	0.0211	0.0175	0.2525
TRAV7D-3	TRAJ44	0	0	0	0.0189	0	0	0	0	0.0063	0.0109	0.0091	0.2525
TRAV7D-4	TRAJ44	0.0111	0	0	0	0	0	0.0037	0.0064	0	0	-0.0053	0.2525
TRAV7N-5	TRAJ44	0	0	0.0335	0	0	0	0.0112	0.0193	0	0	-0.0161	0.2525
TRAV7-2	TRAJ45	0.0223	0.0409	0	0.0757	0.0365	0.1521	0.0211	0.0205	0.0881	0.0588	0.0917	0.0952
TRAV7D-4	TRAJ45	0	0	0	0.1326	0.0122	0.0085	0	0	0.0511	0.0706	0.0719	0.0318
TRAV7D-3	TRAJ45	0	0.0082	0	0.0379	0.0486	0.0507	0.0027	0.0047	0.0457	0.0069	0.0606	0.0383
TRAV7-3	TRAJ45	0	0.0082	0.0753	0.0947	0.0608	0.0592	0.0278	0.0413	0.0716	0.0201	0.0602	0.1914
TRAV7-6	TRAJ45	0.0223	0.0164	0	0.0379	0.0851	0	0.0129	0.0116	0.041	0.0426	0.0395	0.2533
TRAV7N-4	TRAJ45	0	0.0082	0	0.0473	0.0243	0.0085	0.0027	0.0047	0.0267	0.0195	0.0341	0.0383
TRAV7-4	TRAJ45	0.0446	0.0246	0.0084	0.0379	0.0243	0.0254	0.0259	0.0181	0.0292	0.0076	0.0046	0.5
TRAV7-1	TRAJ45	0	0	0	0.0095	0	0	0	0	0.0032	0.0055	0.0046	0.2525
TRAV7N-5	TRAJ45	0.0111	0	0	0	0	0	0.0037	0.0064	0	0	-0.0053	0.2525
TRAV7-5	TRAJ45	0.0111	0.0164	0	0.0095	0	0	0.0092	0.0084	0.0032	0.0055	-0.0086	0.1768
TRAV7D-2	TRAJ45	0.0334	0	0	0	0	0	0.0111	0.0193	0	0	-0.0159	0.2525
TRAV7D-3	TRAJ48	0.0111	0	0	0.0189	0.0243	0.0592	0.0037	0.0064	0.0341	0.0219	0.043	0.0383
TRAV7-2	TRAJ48	0.0111	0.0246	0	0.0663	0.0608	0	0.0119	0.0123	0.0424	0.0368	0.0428	0.2533
TRAV7D-4	TRAJ48	0	0.0082	0	0.0473	0.0122	0.0254	0.0027	0.0047	0.0283	0.0177	0.0364	0.0383
TRAV7D-2	TRAJ48	0	0.0082	0	0	0.0365	0.0254	0.0027	0.0047	0.0206	0.0187	0.0255	0.1768
TRAV7N-4	TRAJ48	0	0.0164	0	0.0568	0.0122	0	0.0055	0.0095	0.023	0.0299	0.0249	0.3214
TRAV7-4	TRAJ48	0.0334	0.0409	0.0167	0.0663	0.0243	0.0507	0.0303	0.0124	0.0471	0.0212	0.0233	0.1914
TRAV7-1	TRAJ48	0	0	0	0.0379	0	0.0085	0	0	0.0155	0.0199	0.0222	0.0984
TRAV7D-5	TRAJ48	0	0.0082	0	0	0.0365	0	0.0027	0.0047	0.0122	0.0211	0.0136	0.5
TRAV7-3	TRAJ48	0.0334	0.0082	0	0.0284	0	0.0254	0.0139	0.0174	0.0179	0.0156	0.0057	0.4124
TRAV7-5	TRAJ48	0.0446	0.0819	0.0335	0.0284	0.0972	0	0.0533	0.0254	0.0419	0.05	-0.0157	0.3313
TRAV7N-5	TRAJ48	0.0111	0	0.0502	0	0	0	0.0204	0.0264	0	0	-0.0291	0.0984
TRAV7-6	TRAJ48	0.0223	0.0409	0.0586	0	0.0243	0.0169	0.0406	0.0182	0.0137	0.0125	-0.0378	0.0952
TRAV7-3	TRAJ49	0.0111	0.0082	0.0251	0.0568	0.0729	0.0845	0.0148	0.009	0.0714	0.0139	0.0783	0.0404
TRAV7-5	TRAJ49	0.0111	0	0	0.0284	0.0365	0.0761	0.0037	0.0064	0.047	0.0255	0.0609	0.0383
TRAV7D-5	TRAJ49	0	0	0	0.0284	0.0486	0	0	0	0.0257	0.0244	0.0366	0.0984
TRAV7N-4	TRAJ49	0.0557	0.0246	0	0.0947	0.0122	0.0338	0.0268	0.0279	0.0469	0.0428	0.028	0.3313
TRAV7-1	TRAJ49	0	0	0	0	0	0.0254	0	0	0.0085	0.0147	0.0122	0.2525
TRAV7D-4	TRAJ49	0.0446	0.0082	0.0167	0.0663	0	0.0169	0.0232	0.019	0.0277	0.0345	0.0063	0.5
TRAV7-2	TRAJ49	0.0446	0.1065	0	0.0284	0.0972	0.0254	0.0504	0.0535	0.0503	0.0406	-0.0001	0.5
TRAV7-4	TRAJ49	0.078	0.0328	0.0753	0.0852	0.0122	0.0761	0.062	0.0254	0.0578	0.0398	-0.0057	0.5
TRAV7D-3	TRAJ49	0	0.0655	0.0251	0.0189	0.0243	0.0254	0.0302	0.033	0.0229	0.0035	-0.0103	0.5
TRAV7N-5	TRAJ49	0.0334	0	0	0	0	0	0.0111	0.0193	0	0	-0.0159	0.2525
TRAV7-6	TRAJ49	0.0446	0.0082	0.0251	0.0284	0	0	0.026	0.0182	0.0095	0.0164	-0.0234	0.1879
TRAV7-3	TRAJ50	0.0223	0.0164	0	0.0757	0.0608	0.0507	0.0129	0.0116	0.0624	0.0126	0.0688	0.0404
TRAV7D-3	TRAJ50	0	0	0	0.0189	0.0243	0.0423	0	0	0.0285	0.0123	0.0405	0.0318
TRAV7N-4	TRAJ50	0.0111	0	0	0.0757	0	0.0169	0.0037	0.0064	0.0309	0.0397	0.0386	0.1768
TRAV7D-4	TRAJ50	0.0111	0.0164	0	0.0663	0.0243	0.0169	0.0092	0.0084	0.0358	0.0266	0.0375	0.0404
TRAV7D-5	TRAJ50	0	0	0	0	0	0.0507	0	0	0.0169	0.0293	0.0242	0.2525
TRAV7-4	TRAJ50	0.0668	0	0.0084	0.0663	0.0243	0.0085	0.0251	0.0364	0.033	0.0299	0.0111	0.3313
TRAV7-5	TRAJ50	0.0446	0.0246	0.0335	0.0379	0.0729	0	0.0342	0.01	0.0369	0.0365	0.0038	0.5
TRAV7-2	TRAJ50	0.0223	0.0246	0	0	0	0.0507	0.0156	0.0136	0.0169	0.0293	0.0018	0.5
TRAV7-6	TRAJ50	0.0111	0.0328	0.0251	0.0189	0	0.0085	0.023	0.011	0.0091	0.0095	-0.0197	0.0952
TRAV7N-5	TRAJ50	0.0334	0.0246	0.0084	0	0	0	0.0221	0.0127	0	0	-0.0315	0.0318
TRAV7-4	TRAJ52	0.0111	0.0082	0.0251	0.0947	0.0243	0.0254	0.0148	0.009	0.0481	0.0403	0.0466	0.0952
TRAV7N-4	TRAJ52	0	0.0082	0	0.0473	0.0122	0.0169	0.0027	0.0047	0.0255	0.0191	0.0324	0.0383
TRAV7-3	TRAJ52	0	0.0246	0	0.0284	0	0.0423	0.0082	0.0142	0.0236	0.0216	0.0219	0.1768
TRAV7D-5	TRAJ52	0	0	0	0.0095	0	0.0254	0	0	0.0116	0.0128	0.0166	0.0984
TRAV7-2	TRAJ52	0.0111	0.0246	0.0084	0.0095	0	0.0592	0.0147	0.0087	0.0229	0.0318	0.0116	0.5
TRAV7D-4	TRAJ52	0.0223	0.0328	0	0.0284	0.0243	0.0254	0.0184	0.0168	0.026	0.0021	0.0107	0.3313
TRAV7D-6	TRAJ52	0	0	0	0.0189	0	0	0	0	0.0063	0.0109	0.0091	0.2525
TRAV7-6	TRAJ52	0.0223	0.0491	0	0.0189	0.0486	0.0085	0.0238	0.0246	0.0253	0.0208	0.0021	0.5
TRAV7N-5	TRAJ52	0.0446	0	0	0	0	0	0.0149	0.0257	0	0	-0.0213	0.2525
TRAV7-5	TRAJ52	0.0334	0	0.067	0.0189	0	0.0254	0.0335	0.0335	0.0148	0.0132	-0.0263	0.2533
TRAV7-2	TRAJ53	0	0	0	0.0095	0.0365	0.0169	0	0	0.021	0.014	0.03	0.0318
TRAV7-3	TRAJ53	0	0	0	0.0284	0.0243	0	0	0	0.0176	0.0154	0.0252	0.0984
TRAV7D-5	TRAJ53	0	0	0	0	0.0243	0	0	0	0.0081	0.014	0.0116	0.2525
TRAV7N-4	TRAJ53	0	0	0	0.0095	0	0.0085	0	0	0.006	0.0052	0.0086	0.0984
TRAV7D-4	TRAJ53	0	0.0164	0	0.0189	0	0.0085	0.0055	0.0095	0.0091	0.0095	0.0052	0.3214
TRAV7D-3	TRAJ53	0	0	0.0251	0.0189	0	0	0.0084	0.0145	0.0063	0.0109	-0.003	0.5
TRAV7-4	TRAJ53	0	0.0164	0	0	0	0	0.0055	0.0095	0	0	-0.0079	0.2525
TRAV7N-5	TRAJ53	0.0111	0.0246	0	0	0	0	0.0119	0.0123	0	0	-0.0171	0.0984
TRAV7-6	TRAJ53	0.0111	0.0491	0.0167	0	0.0122	0.0254	0.0256	0.0205	0.0125	0.0127	-0.0185	0.3313
TRAV7-5	TRAJ53	0.0446	0	0.0586	0.0095	0	0	0.0344	0.0306	0.0032	0.0055	-0.0442	0.1768
TRAV7N-4	TRAJ56	0	0	0	0.0284	0	0.0507	0	0	0.0264	0.0254	0.0376	0.0984
TRAV7-2	TRAJ56	0	0.0082	0	0.0189	0.0243	0.0169	0.0027	0.0047	0.02	0.0038	0.0247	0.0383
TRAV7-5	TRAJ56	0	0.0082	0.0251	0.0473	0.0243	0.0085	0.0111	0.0128	0.0267	0.0195	0.0221	0.1914
TRAV7-3	TRAJ56	0	0	0	0	0	0.0338	0	0	0.0113	0.0195	0.0162	0.2525
TRAV7D-3	TRAJ56	0	0	0	0	0.0243	0	0	0	0.0081	0.014	0.0116	0.2525
TRAV7D-4	TRAJ56	0.0111	0	0	0.0189	0	0.0085	0.0037	0.0064	0.0091	0.0095	0.0077	0.3214
TRAV7-4	TRAJ56	0	0	0.0167	0.0095	0	0.0085	0.0056	0.0096	0.006	0.0052	0.0006	0.5
TRAV7D-2	TRAJ56	0	0.0082	0	0	0	0	0.0027	0.0047	0	0	-0.0039	0.2525
TRAV7-1	TRAJ56	0.0111	0	0	0	0	0	0.0037	0.0064	0	0	-0.0053	0.2525
TRAV7-6	TRAJ56	0.0334	0.0082	0.0251	0	0	0	0.0222	0.0128	0	0	-0.0317	0.0318
TRAV7-2	TRAJ57	0.0223	0.0082	0	0.0189	0.0486	0	0.0102	0.0113	0.0225	0.0245	0.0175	0.4124
TRAV7N-4	TRAJ57	0	0	0	0.0189	0	0.0169	0	0	0.0119	0.0104	0.0171	0.0984
TRAV7D-5	TRAJ57	0	0	0	0	0	0.0338	0	0	0.0113	0.0195	0.0162	0.2525
TRAV7D-4	TRAJ57	0.0111	0	0	0.0284	0	0.0085	0.0037	0.0064	0.0123	0.0146	0.0123	0.3214
TRAV7-5	TRAJ57	0.0111	0.0082	0.0251	0.0189	0.0365	0	0.0148	0.009	0.0185	0.0183	0.0053	0.5
TRAV7-4	TRAJ57	0	0	0.0084	0	0	0.0169	0.0028	0.0048	0.0056	0.0098	0.004	0.5
TRAV7D-2	TRAJ57	0	0	0	0	0	0.0085	0	0	0.0028	0.0049	0.004	0.2525
TRAV7-3	TRAJ57	0	0.0164	0	0	0	0.0085	0.0055	0.0095	0.0028	0.0049	-0.0039	0.5
TRAV7N-5	TRAJ57	0.0111	0	0	0	0	0	0.0037	0.0064	0	0	-0.0053	0.2525
TRAV7-6	TRAJ57	0.0111	0.0164	0.0251	0.0189	0.0122	0	0.0175	0.0071	0.0104	0.0096	-0.0101	0.3313
TRAV7D-5	TRAJ58	0	0	0	0.0095	0	0.0254	0	0	0.0116	0.0128	0.0166	0.0984
TRAV7-2	TRAJ58	0	0	0	0.0189	0.0122	0	0	0	0.0104	0.0096	0.0149	0.0984
TRAV7N-4	TRAJ58	0	0	0	0.0284	0	0	0	0	0.0095	0.0164	0.0136	0.2525
TRAV7-4	TRAJ58	0	0	0	0	0.0243	0	0	0	0.0081	0.014	0.0116	0.2525
TRAV7-6	TRAJ58	0	0.0082	0	0	0	0	0.0027	0.0047	0	0	-0.0039	0.2525
TRAV7-5	TRAJ58	0.0111	0.0409	0.0251	0	0.0122	0.0423	0.0257	0.0149	0.0182	0.0218	-0.0106	0.5
TRAV8-1	TRAJ2	0.0111	0	0	0	0	0	0.0037	0.0064	0	0	-0.0053	0.2525
TRAV8D-1	TRAJ2	0.0111	0	0	0	0	0	0.0037	0.0064	0	0	-0.0053	0.2525
TRAV8N-2	TRAJ2	0.0223	0	0	0	0	0	0.0074	0.0129	0	0	-0.0106	0.2525
TRAV8D-2	TRAJ2	0	0.0246	0.0753	0.0189	0.0122	0.0423	0.0333	0.0384	0.0245	0.0158	-0.0123	0.5
TRAV8N-2	TRAJ4	0	0	0	0.0095	0	0	0	0	0.0032	0.0055	0.0046	0.2525
TRAV8D-1	TRAJ4	0	0.0082	0	0	0	0	0.0027	0.0047	0	0	-0.0039	0.2525
TRAV8-1	TRAJ4	0.0111	0.0409	0	0.0095	0.0243	0	0.0173	0.0212	0.0113	0.0122	-0.0085	0.4124
TRAV8D-2	TRAJ4	0.0334	0.0901	0	0.0189	0.0365	0.0169	0.0412	0.0455	0.0241	0.0108	-0.0239	0.5
TRAV8D-2	TRAJ5	0.0111	0.0164	0.0251	0.0189	0.0608	0.0085	0.0175	0.0071	0.0294	0.0277	0.0168	0.5
TRAV8N-2	TRAJ5	0.0111	0	0	0	0	0	0.0037	0.0064	0	0	-0.0053	0.2525
TRAV8D-1	TRAJ5	0	0	0.0502	0.0189	0	0	0.0167	0.029	0.0063	0.0109	-0.0148	0.5
TRAV8D-1	TRAJ6	0	0	0	0.0095	0.0122	0	0	0	0.0072	0.0064	0.0104	0.0984
TRAV8-1	TRAJ6	0.0111	0.0328	0	0	0.0608	0	0.0146	0.0167	0.0203	0.0351	0.0081	0.5
TRAV8N-2	TRAJ6	0.0111	0	0	0.0095	0	0	0.0037	0.0064	0.0032	0.0055	-0.0007	0.5
TRAV8D-2	TRAJ6	0.0223	0.0573	0.0502	0.0379	0.0486	0.0169	0.0433	0.0185	0.0345	0.0161	-0.0122	0.1914
TRAV8-1	TRAJ7	0.0111	0	0	0	0	0	0.0037	0.0064	0	0	-0.0053	0.2525
TRAV8-1	TRAJ9	0.0223	0.0328	0.0502	0.0379	0.0486	0.0254	0.0351	0.0141	0.0373	0.0116	0.0031	0.5
TRAV8D-2	TRAJ9	0.0668	0.0655	0.0586	0.0568	0.0972	0.0254	0.0636	0.0044	0.0598	0.036	-0.0052	0.3313
TRAV8N-2	TRAJ9	0	0.0246	0	0	0.0122	0	0.0082	0.0142	0.0041	0.007	-0.0059	0.5
TRAV8D-1	TRAJ9	0.0334	0.0328	0	0	0	0.0423	0.0221	0.0191	0.0141	0.0244	-0.0113	0.5
TRAV8-1	TRAJ11	0.0223	0.0082	0.0586	0	0.0851	0.1099	0.0297	0.026	0.065	0.0576	0.0486	0.3313
TRAV8D-1	TRAJ11	0.0111	0	0	0.0284	0	0.0338	0.0037	0.0064	0.0207	0.0182	0.0242	0.1768
TRAV8D-2	TRAJ11	0.0111	0.0082	0	0.0095	0	0	0.0064	0.0058	0.0032	0.0055	-0.0046	0.3214
TRAV8N-2	TRAJ11	0.0111	0	0.0251	0	0	0.0085	0.0121	0.0126	0.0028	0.0049	-0.0133	0.1768
TRAV8D-1	TRAJ12	0.0111	0.0409	0.0335	0.0568	0.0486	0.0085	0.0285	0.0155	0.038	0.0258	0.0133	0.3313
TRAV8D-2	TRAJ12	0.0557	0.0983	0.1255	0.0379	0.1337	0.0592	0.0932	0.0352	0.0769	0.0503	-0.0217	0.5
TRAV8N-2	TRAJ12	0.0111	0.0246	0.0251	0	0	0.0085	0.0203	0.0079	0.0028	0.0049	-0.025	0.0383
TRAV8-1	TRAJ12	0.0891	0.0655	0.1088	0.0663	0.0972	0.0085	0.0878	0.0217	0.0573	0.045	-0.041	0.3313
TRAV8-1	TRAJ13	0	0.0082	0	0.0663	0.0608	0.0507	0.0027	0.0047	0.0593	0.0079	0.0792	0.0383
TRAV8D-2	TRAJ13	0	0.0082	0	0.0284	0.0243	0.0254	0.0027	0.0047	0.026	0.0021	0.0331	0.0383
TRAV8D-1	TRAJ13	0	0.0082	0	0.0095	0	0.0338	0.0027	0.0047	0.0144	0.0174	0.0167	0.1768
TRAV8N-2	TRAJ13	0.0111	0	0.0251	0	0	0	0.0121	0.0126	0	0	-0.0174	0.0984
TRAV8D-2	TRAJ15	0.0446	0.0328	0.0335	0.0095	0.0486	0.1014	0.037	0.0066	0.0532	0.0461	0.0224	0.3313
TRAV8-1	TRAJ15	0.078	0.0983	0.0251	0.0663	0.0972	0.0592	0.0671	0.0378	0.0742	0.0202	0.0096	0.5
TRAV8N-2	TRAJ15	0.0111	0.0246	0.0167	0.0095	0	0	0.0175	0.0068	0.0032	0.0055	-0.0204	0.0383
TRAV8D-1	TRAJ15	0.0111	0	0.0586	0.0189	0	0	0.0232	0.0311	0.0063	0.0109	-0.024	0.3214
TRAV8D-1	TRAJ16	0	0	0.0084	0	0	0	0.0028	0.0048	0	0	-0.004	0.2525
TRAV8-1	TRAJ16	0.0111	0	0	0	0	0	0.0037	0.0064	0	0	-0.0053	0.2525
TRAV8N-2	TRAJ16	0.0223	0	0	0.0095	0	0	0.0074	0.0129	0.0032	0.0055	-0.006	0.5
TRAV8D-2	TRAJ16	0.0111	0.0573	0.0502	0.0095	0.0243	0.0507	0.0395	0.0249	0.0282	0.0209	-0.0158	0.3313
TRAV8-1	TRAJ17	0.0223	0.0164	0.0753	0	0.1094	0.1014	0.038	0.0324	0.0703	0.061	0.0442	0.3313
TRAV8D-1	TRAJ17	0	0.0328	0	0.0189	0.0365	0.0507	0.0109	0.0189	0.0354	0.0159	0.0345	0.092
TRAV8N-2	TRAJ17	0.0111	0	0	0	0	0	0.0037	0.0064	0	0	-0.0053	0.2525
TRAV8D-2	TRAJ17	0.0557	0.0737	0.1088	0.0568	0.0122	0.0085	0.0794	0.027	0.0258	0.0269	-0.0735	0.0952
TRAV8-1	TRAJ18	0.0111	0.0082	0	0.0379	0.0486	0.0338	0.0064	0.0058	0.0401	0.0076	0.0475	0.0404
TRAV8D-1	TRAJ18	0.0223	0.0328	0	0.0095	0	0.0845	0.0184	0.0168	0.0313	0.0463	0.0182	0.4124
TRAV8D-2	TRAJ18	0.0668	0.0819	0.1088	0.0189	0.0608	0.0338	0.0858	0.0213	0.0378	0.0212	-0.0652	0.0404
TRAV8N-2	TRAJ18	0.0111	0.0901	0.0921	0	0	0.0254	0.0644	0.0462	0.0085	0.0147	-0.0778	0.092
TRAV8-1	TRAJ21	0	0.0573	0.0418	0.0473	0.1823	0.093	0.033	0.0296	0.1075	0.0687	0.1005	0.0952
TRAV8D-1	TRAJ21	0	0	0.0335	0.0095	0.0486	0.0676	0.0112	0.0193	0.0419	0.0296	0.0431	0.092
TRAV8N-2	TRAJ21	0.0111	0.0164	0.0251	0	0	0	0.0175	0.0071	0	0	-0.025	0.0318
TRAV8D-2	TRAJ21	0.0334	0.0901	0.0251	0.0095	0.0486	0	0.0495	0.0354	0.0194	0.0258	-0.042	0.1914
TRAV8N-2	TRAJ22	0.0223	0	0.0251	0	0	0.0085	0.0158	0.0138	0.0028	0.0049	-0.0186	0.1768
TRAV8D-2	TRAJ22	0.0668	0.0819	0.0753	0.0757	0.0851	0.0085	0.0747	0.0076	0.0564	0.0418	-0.0248	0.5
TRAV8D-1	TRAJ22	0.0446	0.0491	0.0586	0.0189	0	0.0085	0.0508	0.0071	0.0091	0.0095	-0.0584	0.0404
TRAV8-1	TRAJ22	0.156	0.1146	0.1339	0.0852	0.0486	0.0676	0.1348	0.0207	0.0671	0.0183	-0.0887	0.0404
TRAV8D-2	TRAJ23	0.1003	0.0409	0.0753	0.0663	0.1337	0.3042	0.0722	0.0298	0.1681	0.1226	0.1236	0.1914
TRAV8D-1	TRAJ23	0.0446	0.0082	0.067	0.0284	0.0729	0.0338	0.0399	0.0297	0.045	0.0243	0.0071	0.5
TRAV8-1	TRAJ23	0.1003	0.1065	0.0921	0.0379	0.1945	0.0592	0.0996	0.0072	0.0972	0.0849	-0.0032	0.3313
TRAV8N-2	TRAJ23	0.0223	0.0655	0.0335	0.0284	0.0122	0	0.0404	0.0224	0.0135	0.0142	-0.0378	0.0952
TRAV8D-2	TRAJ24	0	0.0328	0	0.0189	0.0243	0	0.0109	0.0189	0.0144	0.0128	0.005	0.5
TRAV8D-1	TRAJ24	0	0	0	0.0095	0	0	0	0	0.0032	0.0055	0.0046	0.2525
TRAV8-1	TRAJ24	0.0334	0.0655	0.0502	0.0473	0.0243	0.0338	0.0497	0.0161	0.0351	0.0116	-0.0202	0.1914
TRAV8N-2	TRAJ24	0	0.0328	0.0837	0	0.0122	0	0.0388	0.0422	0.0041	0.007	-0.049	0.1768
TRAV8D-2	TRAJ26	0.0334	0.0246	0.0418	0.0189	0	0.1099	0.0333	0.0086	0.0429	0.0588	0.0133	0.3313
TRAV8N-2	TRAJ26	0.0334	0	0	0.0095	0	0	0.0111	0.0193	0.0032	0.0055	-0.0113	0.5
TRAV8-1	TRAJ26	0.0446	0.1146	0.0837	0.0663	0.0486	0.1014	0.081	0.0351	0.0721	0.0269	-0.0119	0.5
TRAV8D-1	TRAJ26	0	0.0328	0.0251	0.0095	0	0.0085	0.0193	0.0172	0.006	0.0052	-0.0189	0.2533
TRAV8D-2	TRAJ27	0.0446	0.0328	0.0753	0.0757	0.0486	0.1268	0.0509	0.0219	0.0837	0.0397	0.0443	0.0952
TRAV8D-1	TRAJ27	0	0.0246	0.0084	0.0095	0.0365	0.0169	0.011	0.0125	0.021	0.014	0.0142	0.1914
TRAV8-2	TRAJ27	0	0.0082	0	0	0.0122	0	0.0027	0.0047	0.0041	0.007	0.002	0.5
TRAV8N-2	TRAJ27	0.0223	0	0.0335	0.0189	0	0.0085	0.0186	0.0171	0.0091	0.0095	-0.0135	0.2533
TRAV8-1	TRAJ27	0.1448	0.1146	0.1841	0.0852	0.0851	0.1352	0.1478	0.0348	0.1018	0.0289	-0.059	0.0952
TRAV8D-2	TRAJ28	0	0	0	0.0189	0	0	0	0	0.0063	0.0109	0.0091	0.2525
TRAV8D-1	TRAJ28	0	0.0082	0	0	0.0243	0	0.0027	0.0047	0.0081	0.014	0.0077	0.5
TRAV8-1	TRAJ28	0.0111	0	0	0	0	0.0254	0.0037	0.0064	0.0085	0.0147	0.0069	0.5
TRAV8D-2	TRAJ30	0.0111	0	0.0167	0.0284	0.0608	0.0338	0.0093	0.0085	0.041	0.0174	0.0446	0.0404
TRAV8N-2	TRAJ30	0.0111	0	0	0.0095	0	0	0.0037	0.0064	0.0032	0.0055	-0.0007	0.5
TRAV8D-1	TRAJ30	0.0446	0.0082	0.0251	0	0.0365	0	0.026	0.0182	0.0122	0.0211	-0.0195	0.1879
TRAV8-1	TRAJ30	0.0334	0.0819	0.1088	0.0284	0.0486	0.0676	0.0747	0.0382	0.0482	0.0196	-0.036	0.1914
TRAV8-1	TRAJ31	0.0446	0.0082	0.0921	0.0663	0.0729	0.2113	0.0483	0.0421	0.1168	0.0819	0.0913	0.1914
TRAV8D-2	TRAJ31	0.0446	0.0409	0.0084	0.0473	0.1459	0.093	0.0313	0.0199	0.0954	0.0493	0.087	0.0404
TRAV8D-1	TRAJ31	0.0111	0	0	0.0284	0.0122	0.0338	0.0037	0.0064	0.0248	0.0112	0.03	0.0383
TRAV8N-2	TRAJ31	0	0.0409	0.0167	0.0189	0	0.0254	0.0192	0.0206	0.0148	0.0132	-0.0062	0.4124
TRAV8D-2	TRAJ32	0.0111	0.0164	0	0.0379	0.0972	0.0676	0.0092	0.0084	0.0676	0.0297	0.0812	0.0404
TRAV8D-1	TRAJ32	0.0111	0	0	0.0095	0.0243	0.0423	0.0037	0.0064	0.0254	0.0164	0.0309	0.092
TRAV8-1	TRAJ32	0.0334	0.0737	0.1004	0.1136	0.1459	0.0085	0.0692	0.0337	0.0893	0.0718	0.0269	0.3313
TRAV8N-2	TRAJ32	0.0223	0	0	0	0	0	0.0074	0.0129	0	0	-0.0106	0.2525
TRAV8D-2	TRAJ33	0.0223	0.0246	0	0.0189	0.0608	0.0085	0.0156	0.0136	0.0294	0.0277	0.0195	0.5
TRAV8-1	TRAJ33	0.0111	0.0246	0.0335	0.0568	0.0122	0	0.0231	0.0113	0.023	0.0299	-0.0001	0.5
TRAV8D-1	TRAJ33	0	0.0328	0	0.0095	0.0122	0	0.0109	0.0189	0.0072	0.0064	-0.0053	0.5
TRAV8N-2	TRAJ33	0.0223	0.0409	0	0	0.0122	0	0.0211	0.0205	0.0041	0.007	-0.0242	0.1768
TRAV8D-2	TRAJ34	0	0.1146	0.0251	0.0757	0.0972	0.0845	0.0466	0.0602	0.0858	0.0108	0.053	0.3313
TRAV8-2	TRAJ34	0	0.0164	0	0.0095	0.0486	0.0085	0.0055	0.0095	0.0222	0.0229	0.0238	0.1879
TRAV8-1	TRAJ34	0.0446	0.0573	0.1339	0.0852	0.0243	0.1437	0.0786	0.0483	0.0844	0.0597	0.0077	0.5
TRAV8D-1	TRAJ34	0.0223	0.0246	0.0251	0	0	0.0338	0.024	0.0015	0.0113	0.0195	-0.018	0.329
TRAV8D-2	TRAJ35	0.0111	0.0246	0	0.0284	0.0365	0.1268	0.0119	0.0123	0.0639	0.0546	0.0723	0.0404
TRAV8-1	TRAJ35	0	0	0	0.0095	0.0122	0.0338	0	0	0.0185	0.0133	0.0264	0.0318
TRAV8D-1	TRAJ35	0	0	0.0418	0.0095	0	0	0.0139	0.0241	0.0032	0.0055	-0.0153	0.5
TRAV8D-1	TRAJ37	0.0223	0	0	0.161	0	0	0.0074	0.0129	0.0537	0.093	0.0648	0.5
TRAV8D-2	TRAJ37	0.0334	0.0737	0.0251	0.0473	0.1094	0.0254	0.0441	0.026	0.0607	0.0436	0.0228	0.3313
TRAV8-1	TRAJ37	0.0668	0.0328	0.0418	0.0189	0.0851	0.0676	0.0471	0.0176	0.0572	0.0343	0.0138	0.3313
TRAV8N-2	TRAJ37	0.0111	0.0328	0.0251	0	0.0122	0.0085	0.023	0.011	0.0069	0.0063	-0.0229	0.0952
TRAV8D-2	TRAJ38	0	0.0164	0	0.0095	0.0486	0	0.0055	0.0095	0.0194	0.0258	0.0198	0.3214
TRAV8D-1	TRAJ38	0.0111	0	0	0	0	0.0423	0.0037	0.0064	0.0141	0.0244	0.0149	0.5
TRAV8-1	TRAJ38	0	0	0.0251	0.0189	0.0122	0.0085	0.0084	0.0145	0.0132	0.0053	0.0069	0.329
TRAV8D-2	TRAJ39	0	0	0	0	0	0.0254	0	0	0.0085	0.0147	0.0122	0.2525
TRAV8D-1	TRAJ39	0.0223	0	0.0251	0.0379	0	0.0338	0.0158	0.0138	0.0239	0.0208	0.0115	0.2533
TRAV8N-2	TRAJ39	0	0	0.0418	0	0	0.0085	0.0139	0.0241	0.0028	0.0049	-0.0159	0.5
TRAV8-1	TRAJ39	0.0668	0.1146	0.0586	0.0379	0.0243	0.0592	0.08	0.0302	0.0405	0.0176	-0.0538	0.0952
TRAV8D-2	TRAJ40	0	0.0164	0.0084	0.0473	0.0972	0.1437	0.0083	0.0082	0.0961	0.0482	0.1205	0.0404
TRAV8-1	TRAJ40	0.0446	0.1392	0.0084	0.0473	0.1702	0.0676	0.0641	0.0675	0.095	0.0659	0.0413	0.1914
TRAV8D-1	TRAJ40	0	0.0409	0.0251	0.0284	0.0486	0.0254	0.022	0.0206	0.0341	0.0126	0.017	0.1914
TRAV8N-2	TRAJ40	0	0	0	0.0095	0	0	0	0	0.0032	0.0055	0.0046	0.2525
TRAV8D-2	TRAJ42	0.0111	0.0246	0.0418	0.0757	0.0972	0.0423	0.0258	0.0154	0.0717	0.0277	0.0632	0.0404
TRAV8N-2	TRAJ42	0	0	0.0167	0	0	0	0.0056	0.0096	0	0	-0.0081	0.2525
TRAV8-1	TRAJ42	0.0446	0.0328	0	0.0379	0.0122	0	0.0258	0.0231	0.0167	0.0193	-0.0129	0.4124
TRAV8D-1	TRAJ42	0.0446	0.0328	0.0167	0.0473	0	0	0.0314	0.014	0.0158	0.0273	-0.022	0.329
TRAV8D-2	TRAJ43	0	0.0737	0.0418	0.0189	0.1337	0.1268	0.0385	0.037	0.0931	0.0644	0.0739	0.1914
TRAV8D-1	TRAJ43	0	0.0164	0	0.0095	0.1216	0.0423	0.0055	0.0095	0.0578	0.0576	0.0732	0.092
TRAV8-1	TRAJ43	0	0.0164	0.0502	0.0663	0.0365	0.0169	0.0222	0.0256	0.0399	0.0249	0.0248	0.1914
TRAV8-2	TRAJ43	0	0.0082	0	0	0.0243	0	0.0027	0.0047	0.0081	0.014	0.0077	0.5
TRAV8-1	TRAJ44	0	0	0	0	0	0.0338	0	0	0.0113	0.0195	0.0162	0.2525
TRAV8-1	TRAJ45	0	0	0	0.0852	0.0608	0.0254	0	0	0.0571	0.0301	0.0801	0.0318
TRAV8-2	TRAJ45	0	0.0082	0	0	0.0729	0.0169	0.0027	0.0047	0.0299	0.0382	0.0386	0.1768
TRAV8D-2	TRAJ45	0	0	0	0.0189	0	0.0592	0	0	0.026	0.0302	0.037	0.0984
TRAV8D-1	TRAJ45	0	0	0	0	0	0.0254	0	0	0.0085	0.0147	0.0122	0.2525
TRAV8D-2	TRAJ48	0.0111	0.0409	0	0.0757	0.1337	0.0338	0.0173	0.0212	0.0811	0.0502	0.0878	0.0952
TRAV8D-1	TRAJ48	0	0.0164	0	0.0189	0	0.0507	0.0055	0.0095	0.0232	0.0256	0.0252	0.1768
TRAV8-1	TRAJ48	0	0.0328	0.0084	0	0.0608	0	0.0137	0.017	0.0203	0.0351	0.0094	0.5
TRAV8N-2	TRAJ48	0	0.0164	0	0	0	0	0.0055	0.0095	0	0	-0.0079	0.2525
TRAV8D-2	TRAJ49	0	0.0409	0.0251	0.0663	0.158	0.1099	0.022	0.0206	0.1114	0.0459	0.121	0.0404
TRAV8-1	TRAJ49	0.0334	0.1146	0	0.0379	0.2188	0.0676	0.0493	0.0589	0.1081	0.097	0.0787	0.1914
TRAV8D-1	TRAJ49	0	0.0082	0	0	0.0122	0.0254	0.0027	0.0047	0.0125	0.0127	0.014	0.1768
TRAV8D-2	TRAJ50	0.0223	0.0491	0	0.0189	0.2066	0.0845	0.0238	0.0246	0.1033	0.0953	0.1079	0.1914
TRAV8-2	TRAJ50	0	0.0082	0	0	0.0729	0.0085	0.0027	0.0047	0.0271	0.0399	0.0347	0.1768
TRAV8-1	TRAJ50	0.0111	0.0246	0	0.0284	0.0122	0.0338	0.0119	0.0123	0.0248	0.0112	0.0183	0.0952
TRAV8D-2	TRAJ52	0	0.0655	0.0251	0.0473	0.1216	0.2028	0.0302	0.033	0.1239	0.0778	0.1256	0.0952
TRAV8D-1	TRAJ52	0	0	0	0	0.0243	0.0338	0	0	0.0194	0.0174	0.0277	0.0984
TRAV8-1	TRAJ52	0.0223	0.0573	0.0084	0.0095	0.0365	0.0085	0.0293	0.0252	0.0182	0.0159	-0.0156	0.5
TRAV8N-2	TRAJ52	0.0334	0	0	0	0	0	0.0111	0.0193	0	0	-0.0159	0.2525
TRAV8D-1	TRAJ53	0	0	0	0.0095	0.0122	0.0254	0	0	0.0157	0.0085	0.0225	0.0318
TRAV8-1	TRAJ53	0	0.0082	0	0.0095	0.0243	0	0.0027	0.0047	0.0113	0.0122	0.0123	0.1768
TRAV8-2	TRAJ53	0	0	0	0.0095	0	0	0	0	0.0032	0.0055	0.0046	0.2525
TRAV8D-2	TRAJ53	0	0.0246	0.0335	0.0189	0.0365	0.0085	0.0194	0.0174	0.0213	0.0142	0.0027	0.5
TRAV8D-2	TRAJ56	0.0111	0.0409	0.0251	0.0095	0.0486	0.0676	0.0257	0.0149	0.0419	0.0296	0.0226	0.3313
TRAV8D-1	TRAJ56	0	0.0246	0	0.0284	0.0122	0.0169	0.0082	0.0142	0.0192	0.0083	0.0157	0.1879
TRAV8-2	TRAJ57	0	0.0082	0	0	0.0608	0	0.0027	0.0047	0.0203	0.0351	0.0251	0.5
TRAV8D-2	TRAJ57	0.0111	0	0	0.0095	0.0243	0.0169	0.0037	0.0064	0.0169	0.0074	0.0188	0.092
TRAV8-1	TRAJ57	0	0	0	0.0095	0	0	0	0	0.0032	0.0055	0.0046	0.2525
TRAV8D-1	TRAJ57	0	0	0	0	0	0.0085	0	0	0.0028	0.0049	0.004	0.2525
TRAV8D-2	TRAJ58	0	0	0	0.0379	0	0.0676	0	0	0.0352	0.0339	0.0499	0.0984
TRAV9-3	TRAJ4	0	0	0	0.0095	0	0	0	0	0.0032	0.0055	0.0046	0.2525
TRAV9-1	TRAJ4	0	0	0	0	0	0.0085	0	0	0.0028	0.0049	0.004	0.2525
TRAV9N-3	TRAJ4	0	0	0.0418	0	0	0.0169	0.0139	0.0241	0.0056	0.0098	-0.0119	0.5
TRAV9N-2	TRAJ4	0	0.0409	0	0	0.0122	0	0.0136	0.0236	0.0041	0.007	-0.0136	0.5
TRAV9D-3	TRAJ4	0	0.0573	0.0167	0	0	0.0085	0.0247	0.0295	0.0028	0.0049	-0.0312	0.1768
TRAV9N-2	TRAJ5	0.0111	0	0	0	0	0	0.0037	0.0064	0	0	-0.0053	0.2525
TRAV9D-3	TRAJ5	0	0.0246	0.0335	0	0.0243	0	0.0194	0.0174	0.0081	0.014	-0.0161	0.1768
TRAV9N-3	TRAJ5	0	0.0573	0.0335	0	0.0365	0.0085	0.0303	0.0288	0.015	0.0191	-0.0216	0.4124
TRAV9D-1	TRAJ6	0	0	0	0	0	0.0254	0	0	0.0085	0.0147	0.0122	0.2525
TRAV9D-3	TRAJ6	0	0.0082	0.0084	0	0.0365	0	0.0055	0.0048	0.0122	0.0211	0.0096	0.5
TRAV9N-3	TRAJ6	0	0.0409	0.0084	0	0.0122	0.0085	0.0164	0.0216	0.0069	0.0063	-0.0135	0.4124
TRAV9N-2	TRAJ7	0.0111	0	0	0	0	0	0.0037	0.0064	0	0	-0.0053	0.2525
TRAV9D-3	TRAJ9	0.0111	0	0	0	0	0.0254	0.0037	0.0064	0.0085	0.0147	0.0069	0.5
TRAV9D-4	TRAJ9	0	0	0	0	0	0.0085	0	0	0.0028	0.0049	0.004	0.2525
TRAV9-1	TRAJ9	0.0111	0	0	0.0189	0	0	0.0037	0.0064	0.0063	0.0109	0.0037	0.5
TRAV9N-2	TRAJ9	0.0111	0	0	0	0	0	0.0037	0.0064	0	0	-0.0053	0.2525
TRAV9-1	TRAJ11	0	0	0	0	0	0.0254	0	0	0.0085	0.0147	0.0122	0.2525
TRAV9D-3	TRAJ11	0	0	0	0.0095	0	0	0	0	0.0032	0.0055	0.0046	0.2525
TRAV9D-2	TRAJ11	0	0	0	0	0	0.0085	0	0	0.0028	0.0049	0.004	0.2525
TRAV9N-2	TRAJ11	0	0.0082	0	0	0	0	0.0027	0.0047	0	0	-0.0039	0.2525
TRAV9-1	TRAJ12	0	0.0246	0	0.0284	0.0365	0	0.0082	0.0142	0.0216	0.0192	0.019	0.1768
TRAV9N-3	TRAJ12	0	0	0	0.0189	0	0	0	0	0.0063	0.0109	0.0091	0.2525
TRAV9D-3	TRAJ12	0	0	0.0084	0	0.0122	0.0085	0.0028	0.0048	0.0069	0.0063	0.0059	0.1768
TRAV9D-4	TRAJ12	0	0	0	0.0095	0	0	0	0	0.0032	0.0055	0.0046	0.2525
TRAV9D-2	TRAJ12	0	0	0	0.0095	0	0	0	0	0.0032	0.0055	0.0046	0.2525
TRAV9D-1	TRAJ12	0	0	0	0	0	0.0085	0	0	0.0028	0.0049	0.004	0.2525
TRAV9N-2	TRAJ12	0	0.0573	0	0	0	0.0254	0.0191	0.0331	0.0085	0.0147	-0.0151	0.5
TRAV9D-4	TRAJ13	0	0.0082	0	0	0.0365	0.0254	0.0027	0.0047	0.0206	0.0187	0.0255	0.1768
TRAV9N-3	TRAJ13	0	0.0082	0	0	0.0486	0	0.0027	0.0047	0.0162	0.0281	0.0193	0.5
TRAV9-1	TRAJ13	0	0	0	0.0284	0	0.0085	0	0	0.0123	0.0146	0.0176	0.0984
TRAV9D-3	TRAJ13	0	0	0.0084	0.0095	0	0	0.0028	0.0048	0.0032	0.0055	0.0006	0.5
TRAV9N-2	TRAJ13	0	0.0491	0.0251	0.0095	0.0122	0	0.0247	0.0246	0.0072	0.0064	-0.0249	0.2533
TRAV9D-1	TRAJ15	0	0	0	0.0284	0	0.0169	0	0	0.0151	0.0143	0.0216	0.0984
TRAV9D-3	TRAJ15	0.0111	0.0246	0	0.0284	0.0243	0.0085	0.0119	0.0123	0.0204	0.0105	0.0121	0.3313
TRAV9-1	TRAJ15	0.0223	0.0164	0	0.0189	0.0365	0	0.0129	0.0116	0.0185	0.0183	0.008	0.4124
TRAV9D-4	TRAJ15	0	0	0	0.0095	0	0	0	0	0.0032	0.0055	0.0046	0.2525
TRAV9N-4	TRAJ15	0	0	0.0084	0	0	0.0085	0.0028	0.0048	0.0028	0.0049	0	0.5
TRAV9D-2	TRAJ15	0	0.0082	0.0084	0	0	0	0.0055	0.0048	0	0	-0.0079	0.0984
TRAV9N-3	TRAJ15	0	0	0.0251	0	0	0	0.0084	0.0145	0	0	-0.0121	0.2525
TRAV9N-2	TRAJ15	0.0223	0.0328	0.0837	0	0	0	0.0463	0.0328	0	0	-0.0653	0.0318
TRAV9D-4	TRAJ16	0	0	0	0	0	0.0338	0	0	0.0113	0.0195	0.0162	0.2525
TRAV9N-2	TRAJ16	0.0111	0	0	0	0	0	0.0037	0.0064	0	0	-0.0053	0.2525
TRAV9-1	TRAJ16	0.0111	0	0	0	0	0	0.0037	0.0064	0	0	-0.0053	0.2525
TRAV9-1	TRAJ17	0.0111	0	0	0.0189	0.0122	0.0085	0.0037	0.0064	0.0132	0.0053	0.0136	0.092
TRAV9D-3	TRAJ17	0	0	0	0	0.0122	0.0085	0	0	0.0069	0.0063	0.0099	0.0984
TRAV9N-2	TRAJ17	0.0223	0.0246	0.0084	0	0.0243	0.0254	0.0184	0.0088	0.0166	0.0144	-0.0026	0.5
TRAV9N-3	TRAJ17	0.0111	0.0164	0.0084	0	0	0	0.012	0.0041	0	0	-0.0172	0.0318
TRAV9-1	TRAJ18	0.0223	0.0082	0	0	0.0608	0.0507	0.0102	0.0113	0.0372	0.0326	0.0381	0.2533
TRAV9D-1	TRAJ18	0	0	0	0	0.0122	0	0	0	0.0041	0.007	0.0059	0.2525
TRAV9D-3	TRAJ18	0	0	0.0084	0	0	0	0.0028	0.0048	0	0	-0.004	0.2525
TRAV9N-3	TRAJ18	0	0.0409	0	0	0.0122	0	0.0136	0.0236	0.0041	0.007	-0.0136	0.5
TRAV9N-3	TRAJ21	0	0.0082	0	0.0095	0.0486	0	0.0027	0.0047	0.0194	0.0258	0.0238	0.1768
TRAV9D-4	TRAJ21	0	0	0	0	0	0.0338	0	0	0.0113	0.0195	0.0162	0.2525
TRAV9-2	TRAJ21	0	0	0	0	0.0122	0	0	0	0.0041	0.007	0.0059	0.2525
TRAV9-1	TRAJ21	0.0334	0	0	0.0284	0.0122	0	0.0111	0.0193	0.0135	0.0142	0.0034	0.5
TRAV9D-3	TRAJ21	0	0	0.0084	0	0	0	0.0028	0.0048	0	0	-0.004	0.2525
TRAV9N-2	TRAJ21	0.0111	0	0.0502	0	0	0.0085	0.0204	0.0264	0.0028	0.0049	-0.0251	0.1768
TRAV9-1	TRAJ22	0	0	0.0335	0	0	0.0338	0.0112	0.0193	0.0113	0.0195	0.0001	0.5
TRAV9D-1	TRAJ22	0.0111	0	0	0.0095	0	0	0.0037	0.0064	0.0032	0.0055	-0.0007	0.5
TRAV9D-2	TRAJ22	0	0.0082	0	0	0	0	0.0027	0.0047	0	0	-0.0039	0.2525
TRAV9N-2	TRAJ22	0	0.0573	0.0084	0	0	0	0.0219	0.0309	0	0	-0.0313	0.0984
TRAV9N-3	TRAJ22	0	0.0164	0.1004	0	0	0	0.0389	0.0539	0	0	-0.0551	0.0984
TRAV9D-3	TRAJ22	0	0.1228	0.067	0.0095	0.0122	0	0.0633	0.0615	0.0072	0.0064	-0.0782	0.2533
TRAV9N-3	TRAJ23	0	0.0328	0	0	0.0243	0.0254	0.0109	0.0189	0.0166	0.0144	0.0081	0.5
TRAV9D-4	TRAJ23	0	0	0	0	0	0.0085	0	0	0.0028	0.0049	0.004	0.2525
TRAV9-1	TRAJ23	0.0223	0.0164	0	0.0095	0.0122	0.0169	0.0129	0.0116	0.0129	0.0037	0	0.5
TRAV9D-1	TRAJ23	0	0.0082	0	0	0	0	0.0027	0.0047	0	0	-0.0039	0.2525
TRAV9N-4	TRAJ23	0.0111	0	0.0084	0	0	0	0.0065	0.0058	0	0	-0.0093	0.0984
TRAV9D-3	TRAJ23	0.0111	0	0.067	0	0	0.0169	0.026	0.0359	0.0056	0.0098	-0.029	0.3214
TRAV9N-2	TRAJ23	0.0111	0.1556	0.0084	0	0.0122	0	0.0584	0.0842	0.0041	0.007	-0.076	0.1879
TRAV9D-4	TRAJ24	0	0	0	0	0	0.0085	0	0	0.0028	0.0049	0.004	0.2525
TRAV9D-1	TRAJ24	0	0	0	0	0	0.0085	0	0	0.0028	0.0049	0.004	0.2525
TRAV9-1	TRAJ26	0	0.0082	0	0	0.0486	0.0085	0.0027	0.0047	0.019	0.026	0.0233	0.1768
TRAV9D-3	TRAJ26	0	0	0	0.0095	0.0122	0	0	0	0.0072	0.0064	0.0104	0.0984
TRAV9-3	TRAJ26	0	0	0	0.0095	0	0.0085	0	0	0.006	0.0052	0.0086	0.0984
TRAV9D-1	TRAJ26	0	0	0	0.0095	0	0	0	0	0.0032	0.0055	0.0046	0.2525
TRAV9D-4	TRAJ26	0	0	0.0335	0	0	0	0.0112	0.0193	0	0	-0.0161	0.2525
TRAV9N-3	TRAJ26	0.0111	0.0328	0	0.0095	0	0	0.0146	0.0167	0.0032	0.0055	-0.0163	0.1768
TRAV9N-2	TRAJ26	0.0223	0	0.0335	0	0	0	0.0186	0.0171	0	0	-0.0266	0.0984
TRAV9-1	TRAJ27	0.0111	0.0082	0.0084	0.0189	0.0122	0.0338	0.0092	0.0016	0.0216	0.0111	0.0176	0.0404
TRAV9N-4	TRAJ27	0	0	0	0	0.0122	0	0	0	0.0041	0.007	0.0059	0.2525
TRAV9D-4	TRAJ27	0	0.0164	0	0.0189	0	0	0.0055	0.0095	0.0063	0.0109	0.0011	0.5
TRAV9N-2	TRAJ27	0	0.1065	0	0	0.0243	0.0254	0.0355	0.0615	0.0166	0.0144	-0.0266	0.5
TRAV9D-3	TRAJ27	0	0.0655	0.0084	0	0	0.0085	0.0246	0.0356	0.0028	0.0049	-0.031	0.3214
TRAV9-2	TRAJ28	0	0	0	0	0.0365	0.0254	0	0	0.0206	0.0187	0.0294	0.0984
TRAV9N-2	TRAJ28	0.0111	0	0	0	0	0	0.0037	0.0064	0	0	-0.0053	0.2525
TRAV9-2	TRAJ30	0	0	0	0	0.0851	0	0	0	0.0284	0.0491	0.0404	0.2525
TRAV9D-4	TRAJ30	0	0	0	0	0	0.0338	0	0	0.0113	0.0195	0.0162	0.2525
TRAV9D-3	TRAJ30	0	0	0	0.0095	0	0	0	0	0.0032	0.0055	0.0046	0.2525
TRAV9-1	TRAJ30	0	0.0082	0	0.0095	0	0	0.0027	0.0047	0.0032	0.0055	0.0007	0.5
TRAV9N-2	TRAJ30	0	0.0082	0	0.0095	0	0	0.0027	0.0047	0.0032	0.0055	0.0007	0.5
TRAV9N-4	TRAJ30	0.0111	0	0	0	0	0	0.0037	0.0064	0	0	-0.0053	0.2525
TRAV9N-3	TRAJ31	0.0111	0	0	0.0095	0.0122	0.0085	0.0037	0.0064	0.0101	0.0019	0.0092	0.1879
TRAV9D-2	TRAJ31	0	0	0.0084	0	0	0.0085	0.0028	0.0048	0.0028	0.0049	0	0.5
TRAV9D-1	TRAJ31	0	0.0246	0.0084	0.0095	0.0122	0	0.011	0.0125	0.0072	0.0064	-0.0054	0.4124
TRAV9-1	TRAJ31	0.0111	0.0409	0.0251	0.0095	0.0122	0.0338	0.0257	0.0149	0.0185	0.0133	-0.0102	0.3313
TRAV9N-4	TRAJ31	0.0111	0.0164	0	0	0	0	0.0092	0.0084	0	0	-0.0132	0.0984
TRAV9D-4	TRAJ31	0.0668	0.0082	0.0418	0.0284	0.0122	0	0.0389	0.0294	0.0135	0.0142	-0.0357	0.1914
TRAV9N-2	TRAJ31	0.0446	0.0573	0.0921	0.0189	0	0.0085	0.0647	0.0246	0.0091	0.0095	-0.0774	0.0404
TRAV9D-1	TRAJ32	0	0	0	0.0095	0	0.0676	0	0	0.0257	0.0366	0.0366	0.0984
TRAV9-1	TRAJ32	0.0111	0	0	0.0095	0.0122	0.0507	0.0037	0.0064	0.0241	0.023	0.029	0.092
TRAV9-3	TRAJ32	0	0	0	0	0.0122	0	0	0	0.0041	0.007	0.0059	0.2525
TRAV9D-2	TRAJ32	0	0	0	0.0095	0	0	0	0	0.0032	0.0055	0.0046	0.2525
TRAV9N-3	TRAJ32	0	0	0.0335	0	0	0	0.0112	0.0193	0	0	-0.0161	0.2525
TRAV9N-2	TRAJ32	0.0111	0	0.0335	0	0	0	0.0149	0.0171	0	0	-0.0213	0.0984
TRAV9N-2	TRAJ33	0	0	0	0.0095	0	0	0	0	0.0032	0.0055	0.0046	0.2525
TRAV9N-4	TRAJ33	0	0	0.0084	0	0	0	0.0028	0.0048	0	0	-0.004	0.2525
TRAV9D-3	TRAJ33	0.0111	0	0	0	0	0	0.0037	0.0064	0	0	-0.0053	0.2525
TRAV9D-4	TRAJ33	0	0.0246	0	0	0.0122	0	0.0082	0.0142	0.0041	0.007	-0.0059	0.5
TRAV9-1	TRAJ34	0.0223	0.0082	0.0084	0.0473	0.0243	0.1352	0.013	0.0081	0.0689	0.0585	0.0775	0.0404
TRAV9D-1	TRAJ34	0	0	0	0	0	0.0085	0	0	0.0028	0.0049	0.004	0.2525
TRAV9D-4	TRAJ34	0	0.0082	0.0084	0.0095	0	0	0.0055	0.0048	0.0032	0.0055	-0.0033	0.5
TRAV9N-4	TRAJ34	0	0	0.0084	0	0	0	0.0028	0.0048	0	0	-0.004	0.2525
TRAV9N-2	TRAJ34	0	0.0082	0.0418	0	0	0.0085	0.0167	0.0221	0.0028	0.0049	-0.0199	0.3214
TRAV9D-1	TRAJ35	0	0	0	0	0.0365	0	0	0	0.0122	0.0211	0.0175	0.2525
TRAV9-1	TRAJ35	0	0	0	0.0095	0	0	0	0	0.0032	0.0055	0.0046	0.2525
TRAV9D-4	TRAJ35	0.0223	0	0	0.0095	0	0	0.0074	0.0129	0.0032	0.0055	-0.006	0.5
TRAV9N-3	TRAJ37	0	0	0	0	0	0.0338	0	0	0.0113	0.0195	0.0162	0.2525
TRAV9D-4	TRAJ37	0	0.0164	0	0.0189	0	0	0.0055	0.0095	0.0063	0.0109	0.0011	0.5
TRAV9D-3	TRAJ37	0	0	0.0084	0	0	0	0.0028	0.0048	0	0	-0.004	0.2525
TRAV9-1	TRAJ37	0.0111	0.0082	0.0084	0.0095	0	0.0085	0.0092	0.0016	0.006	0.0052	-0.0046	0.5
TRAV9D-2	TRAJ37	0	0.0164	0.0084	0	0.0122	0	0.0083	0.0082	0.0041	0.007	-0.006	0.3214
TRAV9N-4	TRAJ37	0	0.0655	0.0084	0	0.0122	0.0338	0.0246	0.0356	0.0153	0.0171	-0.0132	0.4124
TRAV9N-2	TRAJ37	0.0223	0.0491	0.0753	0	0.0122	0.0169	0.0489	0.0265	0.0097	0.0087	-0.055	0.0404
TRAV9D-1	TRAJ38	0	0	0	0	0	0.0085	0	0	0.0028	0.0049	0.004	0.2525
TRAV9N-2	TRAJ38	0.0334	0	0	0	0	0	0.0111	0.0193	0	0	-0.0159	0.2525
TRAV9D-1	TRAJ39	0	0	0	0.0095	0	0.0085	0	0	0.006	0.0052	0.0086	0.0984
TRAV9N-4	TRAJ39	0	0	0	0.0095	0	0	0	0	0.0032	0.0055	0.0046	0.2525
TRAV9-1	TRAJ39	0	0	0	0.0095	0	0	0	0	0.0032	0.0055	0.0046	0.2525
TRAV9-4	TRAJ39	0	0	0	0.0095	0	0	0	0	0.0032	0.0055	0.0046	0.2525
TRAV9D-3	TRAJ39	0	0.0246	0	0	0.0122	0.0085	0.0082	0.0142	0.0069	0.0063	-0.0019	0.5
TRAV9D-4	TRAJ39	0	0.1474	0	0	0	0	0.0491	0.0851	0	0	-0.0692	0.2525
TRAV9N-4	TRAJ40	0	0	0	0.0095	0	0.0085	0	0	0.006	0.0052	0.0086	0.0984
TRAV9-1	TRAJ40	0	0.0082	0	0	0.0122	0	0.0027	0.0047	0.0041	0.007	0.002	0.5
TRAV9D-4	TRAJ40	0	0.0082	0	0	0	0	0.0027	0.0047	0	0	-0.0039	0.2525
TRAV9D-1	TRAJ40	0	0.0082	0	0	0	0	0.0027	0.0047	0	0	-0.0039	0.2525
TRAV9D-3	TRAJ40	0	0	0.0084	0	0	0	0.0028	0.0048	0	0	-0.004	0.2525
TRAV9N-2	TRAJ40	0.0111	0.0491	0	0.0095	0.0122	0	0.0201	0.0257	0.0072	0.0064	-0.0184	0.4124
TRAV9N-2	TRAJ42	0	0	0	0.0095	0	0	0	0	0.0032	0.0055	0.0046	0.2525
TRAV9-1	TRAJ42	0.0111	0.0082	0	0.0189	0	0.0085	0.0064	0.0058	0.0091	0.0095	0.0039	0.4124
TRAV9N-4	TRAJ42	0	0	0.067	0	0	0.0085	0.0223	0.0387	0.0028	0.0049	-0.0278	0.5
TRAV9N-3	TRAJ42	0	0.0082	0.0502	0	0	0	0.0195	0.0269	0	0	-0.0279	0.0984
TRAV9D-3	TRAJ43	0	0.0082	0	0	0.0365	0	0.0027	0.0047	0.0122	0.0211	0.0136	0.5
TRAV9N-3	TRAJ43	0	0.0082	0	0.0095	0.0243	0	0.0027	0.0047	0.0113	0.0122	0.0123	0.1768
TRAV9-1	TRAJ43	0	0	0	0.0095	0	0	0	0	0.0032	0.0055	0.0046	0.2525
TRAV9D-2	TRAJ43	0.0111	0	0	0	0	0	0.0037	0.0064	0	0	-0.0053	0.2525
TRAV9N-2	TRAJ43	0.0223	0.0246	0	0	0	0	0.0156	0.0136	0	0	-0.0223	0.0984
TRAV9D-4	TRAJ43	0.0446	0	0.0084	0	0	0	0.0177	0.0237	0	0	-0.0253	0.0984
TRAV9N-2	TRAJ44	0.0111	0	0	0	0	0	0.0037	0.0064	0	0	-0.0053	0.2525
TRAV9D-1	TRAJ45	0	0.0082	0	0.0095	0.0122	0	0.0027	0.0047	0.0072	0.0064	0.0065	0.1768
TRAV9N-2	TRAJ45	0	0	0	0.0095	0	0	0	0	0.0032	0.0055	0.0046	0.2525
TRAV9D-4	TRAJ45	0.0111	0.0328	0	0	0.0122	0	0.0146	0.0167	0.0041	0.007	-0.015	0.3214
TRAV9D-1	TRAJ48	0	0.0164	0	0	0.0486	0	0.0055	0.0095	0.0162	0.0281	0.0153	0.5
TRAV9D-3	TRAJ48	0	0	0	0	0	0.0085	0	0	0.0028	0.0049	0.004	0.2525
TRAV9D-4	TRAJ48	0.0111	0	0	0.0189	0	0	0.0037	0.0064	0.0063	0.0109	0.0037	0.5
TRAV9-1	TRAJ48	0.0111	0	0	0.0095	0	0	0.0037	0.0064	0.0032	0.0055	-0.0007	0.5
TRAV9-1	TRAJ49	0.0111	0	0	0.0189	0	0.0761	0.0037	0.0064	0.0317	0.0396	0.0397	0.1768
TRAV9N-3	TRAJ49	0	0	0	0.0095	0	0.0169	0	0	0.0088	0.0085	0.0126	0.0984
TRAV9D-1	TRAJ49	0	0.0082	0	0	0	0	0.0027	0.0047	0	0	-0.0039	0.2525
TRAV9D-4	TRAJ49	0.0111	0.0573	0	0	0	0	0.0228	0.0304	0	0	-0.0325	0.0984
TRAV9D-1	TRAJ50	0	0	0	0.0284	0	0.0085	0	0	0.0123	0.0146	0.0176	0.0984
TRAV9-1	TRAJ50	0.0111	0	0	0	0	0.0085	0.0037	0.0064	0.0028	0.0049	-0.0013	0.5
TRAV9D-4	TRAJ50	0.0111	0	0	0	0	0	0.0037	0.0064	0	0	-0.0053	0.2525
TRAV9-1	TRAJ52	0	0.0164	0	0	0.0486	0.0085	0.0055	0.0095	0.019	0.026	0.0192	0.3214
TRAV9D-4	TRAJ52	0.0223	0.0246	0	0	0	0	0.0156	0.0136	0	0	-0.0223	0.0984
TRAV9-1	TRAJ53	0	0	0	0	0	0.0338	0	0	0.0113	0.0195	0.0162	0.2525
TRAV9D-1	TRAJ53	0	0	0	0.0189	0	0	0	0	0.0063	0.0109	0.0091	0.2525
TRAV9D-2	TRAJ53	0.0111	0	0	0	0	0	0.0037	0.0064	0	0	-0.0053	0.2525
TRAV9D-4	TRAJ53	0	0.0655	0	0	0	0.0338	0.0218	0.0378	0.0113	0.0195	-0.0149	0.5
TRAV9N-2	TRAJ53	0	0	0.0502	0	0	0	0.0167	0.029	0	0	-0.0239	0.2525
TRAV9-1	TRAJ56	0.0111	0.0082	0.0167	0.0095	0.0365	0.0169	0.012	0.0043	0.021	0.014	0.0128	0.1914
TRAV9D-1	TRAJ56	0	0.0082	0	0	0.0243	0	0.0027	0.0047	0.0081	0.014	0.0077	0.5
TRAV9D-2	TRAJ56	0.0111	0	0	0	0	0	0.0037	0.0064	0	0	-0.0053	0.2525
TRAV9N-2	TRAJ56	0.0111	0	0	0	0	0	0.0037	0.0064	0	0	-0.0053	0.2525
TRAV9-3	TRAJ57	0	0	0	0	0.0365	0	0	0	0.0122	0.0211	0.0175	0.2525
TRAV9N-3	TRAJ57	0.0111	0	0	0	0	0	0.0037	0.0064	0	0	-0.0053	0.2525
TRAV9N-2	TRAJ57	0.0111	0	0.0418	0	0	0	0.0176	0.0217	0	0	-0.0252	0.0984
TRAV10	TRAJ2	0	0	0.0251	0.0095	0.0365	0.0254	0.0084	0.0145	0.0238	0.0136	0.0219	0.092
TRAV10D	TRAJ2	0.0111	0	0.0418	0	0	0.0085	0.0176	0.0217	0.0028	0.0049	-0.0211	0.1768
TRAV10N	TRAJ2	0	0.0328	0.067	0	0	0.0085	0.0333	0.0335	0.0028	0.0049	-0.0432	0.1768
TRAV10D	TRAJ4	0.0111	0.0164	0	0.0095	0	0	0.0092	0.0084	0.0032	0.0055	-0.0086	0.1768
TRAV10	TRAJ4	0.0111	0.0409	0.0251	0.0095	0.0122	0	0.0257	0.0149	0.0072	0.0064	-0.0263	0.0952
TRAV10N	TRAJ4	0.0111	0.0491	0.0586	0	0.0122	0.0254	0.0396	0.0251	0.0125	0.0127	-0.0381	0.1914
TRAV10D	TRAJ5	0.0111	0.0164	0	0	0.0486	0.0254	0.0092	0.0084	0.0247	0.0243	0.022	0.2533
TRAV10	TRAJ5	0	0	0	0.0095	0	0.0254	0	0	0.0116	0.0128	0.0166	0.0984
TRAV10	TRAJ6	0.0557	0.0246	0	0.0473	0.0243	0.0254	0.0268	0.0279	0.0323	0.013	0.0077	0.5
TRAV10D	TRAJ6	0	0	0.0335	0	0	0	0.0112	0.0193	0	0	-0.0161	0.2525
TRAV10N	TRAJ6	0.0334	0.0246	0.0753	0.0095	0.0122	0.0085	0.0444	0.0271	0.0101	0.0019	-0.0482	0.0404
TRAV10D	TRAJ9	0.0111	0.0409	0	0.0284	0.0486	0	0.0173	0.0212	0.0257	0.0244	0.0119	0.4124
TRAV10	TRAJ9	0.0223	0.0573	0.0502	0.0379	0.0122	0.0507	0.0433	0.0185	0.0336	0.0196	-0.0135	0.3313
TRAV10N	TRAJ9	0.0223	0.0573	0.1172	0.0095	0.0122	0.0085	0.0656	0.048	0.0101	0.0019	-0.0772	0.0404
TRAV10	TRAJ11	0.0223	0.0082	0.0418	0.0189	0.0243	0.0592	0.0241	0.0169	0.0341	0.0219	0.014	0.3313
TRAV10D	TRAJ11	0.0111	0	0	0.0189	0.0122	0	0.0037	0.0064	0.0104	0.0096	0.0096	0.1768
TRAV10N	TRAJ11	0.0223	0	0.0586	0	0	0.0085	0.027	0.0296	0.0028	0.0049	-0.0344	0.1768
TRAV10D	TRAJ12	0.0111	0.0573	0	0.0189	0.0486	0.0845	0.0228	0.0304	0.0507	0.0328	0.0388	0.1914
TRAV10	TRAJ12	0.078	0.0328	0.0335	0.0379	0.0729	0	0.0481	0.0259	0.0369	0.0365	-0.0155	0.5
TRAV10N	TRAJ12	0.0446	0.0246	0.1339	0.0189	0.0122	0	0.0677	0.0582	0.0104	0.0096	-0.0796	0.0404
TRAV10	TRAJ13	0.0223	0.0246	0	0.0852	0.1216	0.169	0.0156	0.0136	0.1253	0.042	0.148	0.0404
TRAV10D	TRAJ13	0	0.0409	0	0.0189	0.0486	0	0.0136	0.0236	0.0225	0.0245	0.0126	0.3214
TRAV10N	TRAJ13	0.0891	0.0328	0	0.0189	0.0122	0	0.0406	0.0451	0.0104	0.0096	-0.0425	0.2533
TRAV10D	TRAJ15	0.0446	0.0164	0	0.0852	0.0365	0.0761	0.0203	0.0226	0.0659	0.0259	0.0631	0.0952
TRAV10	TRAJ15	0.0334	0.0983	0.0586	0.0757	0.0608	0.0338	0.0634	0.0327	0.0568	0.0212	-0.009	0.5
TRAV10N	TRAJ15	0.078	0.0409	0	0.0189	0.0122	0	0.0396	0.039	0.0104	0.0096	-0.0411	0.2533
TRAV10D	TRAJ16	0.0334	0	0	0.0189	0	0.0423	0.0111	0.0193	0.0204	0.0212	0.0132	0.3214
TRAV10	TRAJ16	0.0668	0.0328	0.0335	0.0095	0.0729	0.0254	0.0444	0.0194	0.0359	0.033	-0.0118	0.3313
TRAV10N	TRAJ16	0	0.0246	0.0502	0	0	0.0085	0.0249	0.0251	0.0028	0.0049	-0.0314	0.1768
TRAV10D	TRAJ17	0	0.0082	0.0251	0	0.0365	0.0338	0.0111	0.0128	0.0234	0.0203	0.0174	0.2533
TRAV10N	TRAJ17	0.0446	0.1228	0	0.0473	0.0729	0.0254	0.0558	0.0622	0.0485	0.0238	-0.01	0.5
TRAV10	TRAJ17	0.0557	0.0737	0.0921	0.0757	0	0.0423	0.0738	0.0182	0.0393	0.0379	-0.0471	0.1914
TRAV10	TRAJ18	0.0668	0.0409	0.0251	0.0568	0.1823	0.0507	0.0443	0.0211	0.0966	0.0743	0.0705	0.1914
TRAV10D	TRAJ18	0	0.0328	0	0.0284	0.0729	0.0423	0.0109	0.0189	0.0479	0.0228	0.0519	0.092
TRAV10N	TRAJ18	0.0223	0.0573	0	0.0189	0	0	0.0265	0.0289	0.0063	0.0109	-0.0287	0.1768
TRAV10D	TRAJ21	0.0223	0.0409	0	0.142	0.0972	0.0254	0.0211	0.0205	0.0882	0.0588	0.0918	0.0952
TRAV10N	TRAJ21	0.0668	0.0409	0.0167	0.0189	0.0122	0.0085	0.0415	0.0251	0.0132	0.0053	-0.0397	0.0952
TRAV10	TRAJ21	0.1337	0.1392	0.1255	0.0473	0.0608	0.1859	0.1328	0.0069	0.098	0.0764	-0.045	0.3313
TRAV10D	TRAJ22	0.0446	0	0.1088	0.0852	0	0.0338	0.0511	0.0547	0.0397	0.0429	-0.0157	0.4124
TRAV10	TRAJ22	0.0557	0.0983	0.0084	0.0189	0.0122	0.0338	0.0541	0.045	0.0216	0.0111	-0.0452	0.3313
TRAV10N	TRAJ22	0.0446	0.0246	0.0753	0	0	0	0.0482	0.0255	0	0	-0.0679	0.0318
TRAV10D	TRAJ23	0.0334	0.0409	0	0.0757	0.1216	0.0338	0.0248	0.0218	0.077	0.0439	0.0717	0.0952
TRAV10	TRAJ23	0.156	0.2457	0.0335	0.0663	0.1945	0.2028	0.1451	0.1065	0.1545	0.0765	0.0118	0.5
TRAV10N	TRAJ23	0.078	0.1228	0.1004	0.0189	0	0.0085	0.1004	0.0224	0.0091	0.0095	-0.125	0.0404
TRAV10N	TRAJ24	0	0.0164	0.0251	0	0.0486	0.0085	0.0138	0.0127	0.019	0.026	0.0074	0.4124
TRAV10D	TRAJ24	0.0111	0	0	0.0095	0	0	0.0037	0.0064	0.0032	0.0055	-0.0007	0.5
TRAV10	TRAJ24	0.0446	0.0409	0.0251	0.0189	0.0122	0	0.0369	0.0104	0.0104	0.0096	-0.0374	0.0404
TRAV10D	TRAJ26	0.0111	0.0164	0.0335	0.0284	0.1337	0.0085	0.0203	0.0117	0.0569	0.0673	0.0508	0.5
TRAV10	TRAJ26	0.0891	0.1146	0.0502	0.0568	0.1216	0.093	0.0846	0.0324	0.0905	0.0325	0.0078	0.3313
TRAV10N	TRAJ26	0.0223	0.0655	0.0335	0	0	0	0.0404	0.0224	0	0	-0.0571	0.0318
TRAV10D	TRAJ27	0.0111	0.0573	0.0084	0.0284	0.1094	0	0.0256	0.0275	0.0459	0.0568	0.0283	0.5
TRAV10	TRAJ27	0.0446	0.0819	0.1841	0.1326	0.1216	0.0761	0.1035	0.0722	0.1101	0.03	0.0086	0.5
TRAV10N	TRAJ27	0.0446	0	0.0251	0	0	0	0.0232	0.0224	0	0	-0.0331	0.0984
TRAV10	TRAJ28	0	0.0328	0.0167	0.0095	0.0729	0.0169	0.0165	0.0164	0.0331	0.0347	0.0234	0.3313
TRAV10D	TRAJ28	0	0	0	0	0	0.0254	0	0	0.0085	0.0147	0.0122	0.2525
TRAV10N	TRAJ28	0.0223	0	0	0	0	0	0.0074	0.0129	0	0	-0.0106	0.2525
TRAV10D	TRAJ30	0.0223	0	0	0.0568	0	0.0085	0.0074	0.0129	0.0218	0.0306	0.0205	0.3214
TRAV10	TRAJ30	0.1003	0.0573	0.0837	0.0189	0.0972	0.1183	0.0804	0.0217	0.0781	0.0524	-0.0031	0.5
TRAV10N	TRAJ30	0.0334	0	0.0753	0	0	0	0.0362	0.0377	0	0	-0.0513	0.0984
TRAV10D	TRAJ31	0	0.0246	0	0.0473	0.0972	0.0423	0.0082	0.0142	0.0623	0.0304	0.0754	0.0383
TRAV10N	TRAJ31	0.0446	0.0901	0.0753	0.0284	0	0.0169	0.07	0.0232	0.0151	0.0143	-0.076	0.0404
TRAV10	TRAJ31	0.3342	0.3357	0.318	0.142	0.2431	0.2197	0.3293	0.0098	0.2016	0.0529	-0.1457	0.0404
TRAV10	TRAJ32	0.0668	0.0901	0.0586	0.0663	0.1337	0.1014	0.0718	0.0163	0.1005	0.0337	0.0381	0.1914
TRAV10D	TRAJ32	0	0	0	0	0	0.0254	0	0	0.0085	0.0147	0.0122	0.2525
TRAV10N	TRAJ32	0	0	0.0251	0.0095	0	0	0.0084	0.0145	0.0032	0.0055	-0.0075	0.5
TRAV10D	TRAJ33	0	0	0	0.0379	0.0243	0	0	0	0.0207	0.0192	0.0296	0.0984
TRAV10N	TRAJ33	0.0111	0	0	0	0	0	0.0037	0.0064	0	0	-0.0053	0.2525
TRAV10	TRAJ33	0.0334	0.0328	0.0921	0.0663	0	0.0169	0.0528	0.0341	0.0277	0.0345	-0.0348	0.1914
TRAV10D	TRAJ34	0.0223	0.0164	0	0.0379	0.0243	0	0.0129	0.0116	0.0207	0.0192	0.0111	0.2533
TRAV10	TRAJ34	0.0557	0.1146	0.0753	0.0663	0.0122	0.1352	0.0819	0.03	0.0712	0.0616	-0.0143	0.5
TRAV10N	TRAJ34	0.0111	0.0328	0.0586	0	0	0	0.0342	0.0238	0	0	-0.0485	0.0318
TRAV10	TRAJ35	0	0.0246	0	0.0095	0.0365	0.0507	0.0082	0.0142	0.0322	0.0209	0.0339	0.092
TRAV10D	TRAJ35	0	0	0	0.0189	0	0	0	0	0.0063	0.0109	0.0091	0.2525
TRAV10D	TRAJ37	0	0	0	0.0379	0	0	0	0	0.0126	0.0219	0.0181	0.2525
TRAV10N	TRAJ37	0.0111	0	0	0	0	0	0.0037	0.0064	0	0	-0.0053	0.2525
TRAV10	TRAJ37	0.156	0.0655	0.1423	0.0757	0	0.0423	0.1213	0.0488	0.0393	0.0379	-0.1096	0.0952
TRAV10	TRAJ38	0.0446	0.0328	0.0251	0.0189	0	0	0.0342	0.0098	0.0063	0.0109	-0.0395	0.0383
TRAV10D	TRAJ39	0	0.0082	0	0.0284	0.0365	0.0423	0.0027	0.0047	0.0357	0.007	0.0467	0.0383
TRAV10	TRAJ39	0.0668	0.0246	0.0084	0	0.0608	0.0507	0.0333	0.0301	0.0372	0.0326	0.0054	0.5
TRAV10N	TRAJ39	0.0111	0.0246	0.0084	0.0189	0	0	0.0147	0.0087	0.0063	0.0109	-0.012	0.1879
TRAV10	TRAJ40	0.0557	0.0491	0.0335	0.0379	0.0365	0.1775	0.0461	0.0114	0.084	0.081	0.0513	0.5
TRAV10D	TRAJ40	0.0334	0	0	0.0284	0.0243	0	0.0111	0.0193	0.0176	0.0154	0.0092	0.5
TRAV10	TRAJ42	0.0111	0.0737	0.0251	0.0379	0.0729	0.0592	0.0366	0.0329	0.0567	0.0176	0.0277	0.3313
TRAV10D	TRAJ42	0.0223	0.0737	0.0251	0	0.0486	0.0338	0.0404	0.0289	0.0275	0.0249	-0.018	0.5
TRAV10D	TRAJ43	0	0.0082	0	0.0189	0.0365	0.0592	0.0027	0.0047	0.0382	0.0202	0.0502	0.0383
TRAV10N	TRAJ43	0.0223	0	0	0.0284	0	0	0.0074	0.0129	0.0095	0.0164	0.003	0.5
TRAV10	TRAJ43	0.1114	0.0655	0.0335	0.1326	0	0.0676	0.0701	0.0392	0.0667	0.0663	-0.0046	0.5
TRAV10	TRAJ45	0.0223	0.0082	0.0335	0.0568	0.0365	0.0338	0.0213	0.0127	0.0424	0.0126	0.0295	0.0404
TRAV10D	TRAJ45	0	0.0082	0	0.0284	0.0243	0	0.0027	0.0047	0.0176	0.0154	0.0213	0.1768
TRAV10D	TRAJ48	0	0.0164	0	0.0095	0.0365	0.0507	0.0055	0.0095	0.0322	0.0209	0.0378	0.092
TRAV10	TRAJ48	0.0446	0.0655	0.0251	0.0473	0.0729	0.0761	0.0451	0.0202	0.0654	0.0158	0.0278	0.0952
TRAV10N	TRAJ48	0	0.0409	0.0418	0.0189	0	0	0.0276	0.0239	0.0063	0.0109	-0.0302	0.1768
TRAV10D	TRAJ49	0	0.0164	0	0.0284	0.0486	0.0169	0.0055	0.0095	0.0313	0.016	0.0366	0.0383
TRAV10	TRAJ49	0.0557	0.1146	0.0837	0.0947	0.1337	0.1014	0.0847	0.0295	0.1099	0.0209	0.0331	0.1914
TRAV10N	TRAJ49	0.0334	0	0	0	0.0486	0	0.0111	0.0193	0.0162	0.0281	0.0073	0.5
TRAV10D	TRAJ50	0	0	0	0.0189	0.0365	0.0676	0	0	0.041	0.0247	0.058	0.0318
TRAV10	TRAJ50	0.0223	0	0	0.0284	0	0.0254	0.0074	0.0129	0.0179	0.0156	0.015	0.1768
TRAV10D	TRAJ52	0	0.0082	0	0.0189	0.0122	0.0254	0.0027	0.0047	0.0188	0.0066	0.023	0.0383
TRAV10	TRAJ52	0.0223	0.0164	0.0502	0.0189	0	0.0592	0.0296	0.0181	0.026	0.0302	-0.0051	0.5
TRAV10D	TRAJ53	0	0	0	0.0284	0.0729	0	0	0	0.0338	0.0367	0.048	0.0984
TRAV10	TRAJ53	0.0111	0.0409	0	0.0095	0.0365	0.0169	0.0173	0.0212	0.021	0.014	0.0052	0.5
TRAV10D	TRAJ56	0	0	0	0.0189	0	0.0254	0	0	0.0148	0.0132	0.0212	0.0984
TRAV10	TRAJ56	0.0334	0.0082	0	0	0	0.0592	0.0139	0.0174	0.0197	0.0342	0.0082	0.5
TRAV10N	TRAJ56	0	0	0	0.0095	0	0	0	0	0.0032	0.0055	0.0046	0.2525
TRAV10	TRAJ57	0	0.0082	0	0.0095	0.0365	0.093	0.0027	0.0047	0.0463	0.0426	0.0614	0.0383
TRAV10	TRAJ58	0.0111	0	0	0.0189	0	0	0.0037	0.0064	0.0063	0.0109	0.0037	0.5
TRAV10D	TRAJ58	0	0	0.0335	0	0	0.0085	0.0112	0.0193	0.0028	0.0049	-0.012	0.5
TRAV11N	TRAJ4	0.0111	0	0	0	0	0	0.0037	0.0064	0	0	-0.0053	0.2525
TRAV11	TRAJ6	0.0111	0	0.0251	0.0095	0	0.0254	0.0121	0.0126	0.0116	0.0128	-0.0007	0.4124
TRAV11N	TRAJ6	0.0111	0	0.0335	0.0095	0	0	0.0149	0.0171	0.0032	0.0055	-0.0167	0.1768
TRAV11	TRAJ11	0.0223	0.0082	0.0251	0	0	0	0.0185	0.0091	0	0	-0.0264	0.0318
TRAV11	TRAJ12	0	0.0082	0	0	0.0365	0.0169	0.0027	0.0047	0.0178	0.0183	0.0216	0.1768
TRAV11	TRAJ15	0	0	0	0	0	0.0338	0	0	0.0113	0.0195	0.0162	0.2525
TRAV11N	TRAJ17	0.0111	0.0737	0.0251	0.0095	0.0122	0	0.0366	0.0329	0.0072	0.0064	-0.0415	0.0952
TRAV11	TRAJ17	0.078	0	0.1172	0.0095	0	0.0085	0.0651	0.0597	0.006	0.0052	-0.0824	0.2533
TRAV11	TRAJ18	0.156	0.1146	0.1255	0.2746	0.1216	0.4648	0.132	0.0215	0.287	0.1719	0.1851	0.1914
TRAV11N	TRAJ18	0	0.0246	0.0251	0	0.0122	0.0085	0.0166	0.0143	0.0069	0.0063	-0.0138	0.2533
TRAV11	TRAJ21	0.0111	0	0	0	0	0	0.0037	0.0064	0	0	-0.0053	0.2525
TRAV11N	TRAJ24	0	0	0.0251	0	0	0.0085	0.0084	0.0145	0.0028	0.0049	-0.008	0.5
TRAV11	TRAJ26	0.0223	0	0	0.0095	0	0	0.0074	0.0129	0.0032	0.0055	-0.006	0.5
TRAV11N	TRAJ26	0.0334	0.0246	0	0	0	0	0.0193	0.0173	0	0	-0.0276	0.0984
TRAV11	TRAJ27	0.0334	0.0573	0.0502	0.0663	0.0972	0.0254	0.047	0.0123	0.063	0.036	0.0219	0.3313
TRAV11	TRAJ31	0.0223	0.0246	0	0	0.0122	0	0.0156	0.0136	0.0041	0.007	-0.0164	0.1768
TRAV11	TRAJ32	0.0446	0.0082	0	0.0568	0.0608	0.0845	0.0176	0.0237	0.0674	0.015	0.0689	0.0404
TRAV11	TRAJ33	0.0223	0.0901	0.0251	0.0095	0.1337	0.0085	0.0458	0.0384	0.0506	0.072	0.0066	0.3313
TRAV11	TRAJ34	0.0334	0.0164	0	0.0189	0.0122	0	0.0166	0.0167	0.0104	0.0096	-0.0088	0.4124
TRAV11	TRAJ35	0	0.0328	0	0	0	0	0.0109	0.0189	0	0	-0.0156	0.2525
TRAV11N	TRAJ37	0	0	0.0418	0	0	0	0.0139	0.0241	0	0	-0.0199	0.2525
TRAV11	TRAJ38	0.0223	0	0	0.0095	0	0.0338	0.0074	0.0129	0.0144	0.0174	0.01	0.3214
TRAV11	TRAJ39	0.0111	0.0409	0	0.0095	0.0243	0.0169	0.0173	0.0212	0.0169	0.0074	-0.0006	0.5
TRAV11	TRAJ42	0.0223	0	0.0251	0.0095	0	0.0085	0.0158	0.0138	0.006	0.0052	-0.014	0.2533
TRAV11	TRAJ43	0	0	0	0.0095	0	0	0	0	0.0032	0.0055	0.0046	0.2525
TRAV11	TRAJ50	0.0111	0	0	0.0284	0	0	0.0037	0.0064	0.0095	0.0164	0.0083	0.5
TRAV11	TRAJ53	0	0	0	0.0095	0	0	0	0	0.0032	0.0055	0.0046	0.2525
TRAV11	TRAJ56	0.0111	0	0	0	0	0	0.0037	0.0064	0	0	-0.0053	0.2525
TRAV11	TRAJ57	0	0	0	0.0663	0	0.0423	0	0	0.0362	0.0336	0.0513	0.0984
TRAV12-2	TRAJ2	0	0	0	0.0095	0	0	0	0	0.0032	0.0055	0.0046	0.2525
TRAV12D-1	TRAJ2	0.0111	0.0082	0	0	0	0	0.0064	0.0058	0	0	-0.0092	0.0984
TRAV12N-3	TRAJ2	0.0446	0.0246	0.0167	0.0095	0	0.0085	0.0286	0.0144	0.006	0.0052	-0.0321	0.0404
TRAV12D-2	TRAJ2	0.0668	0.0409	0.0335	0.0379	0	0	0.0471	0.0175	0.0126	0.0219	-0.0483	0.092
TRAV12D-3	TRAJ4	0	0	0	0.0095	0	0	0	0	0.0032	0.0055	0.0046	0.2525
TRAV12-1	TRAJ4	0.0111	0.0082	0	0	0	0	0.0064	0.0058	0	0	-0.0092	0.0984
TRAV12D-1	TRAJ4	0	0.0328	0	0	0	0	0.0109	0.0189	0	0	-0.0156	0.2525
TRAV12-3	TRAJ4	0.0223	0.0246	0.0084	0	0	0	0.0184	0.0088	0	0	-0.0263	0.0318
TRAV12D-2	TRAJ4	0.1003	0.0819	0.1339	0.1041	0.0851	0.0592	0.1054	0.0264	0.0828	0.0225	-0.0298	0.3313
TRAV12N-3	TRAJ4	0.0891	0.0901	0.0335	0.0473	0.0122	0	0.0709	0.0324	0.0198	0.0246	-0.0705	0.0952
TRAV12D-2	TRAJ5	0.0334	0	0.067	0.0379	0.0729	0.0423	0.0335	0.0335	0.051	0.0191	0.0242	0.1914
TRAV12-2	TRAJ5	0	0	0	0.0095	0	0.0085	0	0	0.006	0.0052	0.0086	0.0984
TRAV12-1	TRAJ5	0.0111	0	0.0084	0	0	0.0254	0.0065	0.0058	0.0085	0.0147	0.0029	0.5
TRAV12D-1	TRAJ5	0	0.0082	0.0084	0.0095	0	0	0.0055	0.0048	0.0032	0.0055	-0.0033	0.5
TRAV12N-3	TRAJ5	0.1337	0.0082	0.0586	0.0379	0	0	0.0668	0.0632	0.0126	0.0219	-0.0752	0.092
TRAV12-2	TRAJ6	0	0.0164	0	0.0473	0.0243	0.0085	0.0055	0.0095	0.0267	0.0195	0.0301	0.092
TRAV12D-1	TRAJ6	0	0	0	0.0095	0	0.0169	0	0	0.0088	0.0085	0.0126	0.0984
TRAV12D-3	TRAJ6	0	0	0	0.0095	0	0	0	0	0.0032	0.0055	0.0046	0.2525
TRAV12-3	TRAJ6	0.0111	0.0246	0	0	0.0122	0	0.0119	0.0123	0.0041	0.007	-0.0112	0.3214
TRAV12-1	TRAJ6	0.0223	0.0082	0.0251	0	0	0.0085	0.0185	0.0091	0.0028	0.0049	-0.0224	0.092
TRAV12D-2	TRAJ6	0.1225	0.0328	0.159	0.1326	0.0486	0.0085	0.1048	0.0649	0.0632	0.0633	-0.0554	0.3313
TRAV12N-3	TRAJ6	0.1671	0.0328	0.0251	0.0284	0.0122	0	0.075	0.0799	0.0135	0.0142	-0.085	0.0952
TRAV12N-3	TRAJ7	0	0	0	0.0189	0	0	0	0	0.0063	0.0109	0.0091	0.2525
TRAV12D-1	TRAJ7	0.0111	0	0	0	0	0	0.0037	0.0064	0	0	-0.0053	0.2525
TRAV12D-3	TRAJ9	0	0	0	0.0663	0.0243	0.0254	0	0	0.0387	0.0239	0.0548	0.0318
TRAV12-2	TRAJ9	0	0	0.0084	0.0663	0	0	0.0028	0.0048	0.0221	0.0383	0.0275	0.5
TRAV12-1	TRAJ9	0.0334	0.0409	0.0418	0	0.0851	0.0592	0.0387	0.0046	0.0481	0.0436	0.013	0.3313
TRAV12-3	TRAJ9	0	0	0.0084	0.0095	0	0	0.0028	0.0048	0.0032	0.0055	0.0006	0.5
TRAV12D-1	TRAJ9	0	0.0328	0.067	0.0473	0	0	0.0333	0.0335	0.0158	0.0273	-0.0246	0.3214
TRAV12D-2	TRAJ9	0.156	0.0983	0.159	0.1041	0.0486	0.1099	0.1378	0.0342	0.0875	0.0338	-0.0652	0.1914
TRAV12N-3	TRAJ9	0.1448	0.0737	0.1841	0.0568	0.0243	0.0085	0.1342	0.056	0.0299	0.0246	-0.1392	0.0404
TRAV12D-3	TRAJ11	0	0.0082	0.0084	0.0284	0.0608	0.0423	0.0055	0.0048	0.0438	0.0163	0.0539	0.0404
TRAV12-1	TRAJ11	0	0	0	0	0.0122	0	0	0	0.0041	0.007	0.0059	0.2525
TRAV12-2	TRAJ11	0	0	0	0.0095	0	0	0	0	0.0032	0.0055	0.0046	0.2525
TRAV12D-2	TRAJ11	0.0223	0.0409	0.1088	0.0284	0.1094	0.0338	0.0573	0.0455	0.0572	0.0453	-0.0001	0.5
TRAV12D-1	TRAJ11	0.0111	0	0	0	0	0	0.0037	0.0064	0	0	-0.0053	0.2525
TRAV12N-3	TRAJ11	0.0334	0.0246	0	0.0189	0	0	0.0193	0.0173	0.0063	0.0109	-0.0185	0.1768
TRAV12D-3	TRAJ12	0	0.0082	0	0.0284	0.0486	0.0169	0.0027	0.0047	0.0313	0.016	0.0406	0.0383
TRAV12-2	TRAJ12	0	0	0	0.0095	0.0122	0.0254	0	0	0.0157	0.0085	0.0225	0.0318
TRAV12-1	TRAJ12	0	0.0082	0.0335	0.0095	0	0.0338	0.0139	0.0175	0.0144	0.0174	0.0007	0.4124
TRAV12D-1	TRAJ12	0.0111	0.0246	0	0.0095	0.0122	0	0.0119	0.0123	0.0072	0.0064	-0.0067	0.4124
TRAV12-3	TRAJ12	0.0111	0.0164	0	0	0	0	0.0092	0.0084	0	0	-0.0132	0.0984
TRAV12D-2	TRAJ12	0.1671	0.0573	0.1758	0.1136	0.0851	0.0592	0.1334	0.066	0.086	0.0272	-0.0616	0.3313
TRAV12N-3	TRAJ12	0.156	0.0819	0.1925	0.0568	0	0.0507	0.1435	0.0564	0.0358	0.0312	-0.1427	0.0404
TRAV12-2	TRAJ13	0	0	0	0.0284	0.0365	0.0507	0	0	0.0385	0.0113	0.0545	0.0318
TRAV12D-3	TRAJ13	0	0.0082	0	0.0663	0	0.0169	0.0027	0.0047	0.0277	0.0345	0.0355	0.1768
TRAV12-1	TRAJ13	0.0223	0.0164	0	0.0095	0.0122	0.0085	0.0129	0.0116	0.0101	0.0019	-0.004	0.3313
TRAV12D-1	TRAJ13	0.0111	0.0164	0	0.0095	0	0	0.0092	0.0084	0.0032	0.0055	-0.0086	0.1768
TRAV12D-2	TRAJ13	0.1003	0.1146	0.2427	0.1515	0.0851	0.0845	0.1525	0.0784	0.107	0.0385	-0.0581	0.1914
TRAV12N-3	TRAJ13	0.1114	0.131	0.067	0.0284	0.0243	0	0.1031	0.0328	0.0176	0.0154	-0.1164	0.0404
TRAV12D-3	TRAJ15	0	0	0	0.0568	0.1094	0.0338	0	0	0.0667	0.0388	0.0932	0.0318
TRAV12D-1	TRAJ15	0.0111	0.0082	0	0.0663	0.0243	0.0169	0.0064	0.0058	0.0358	0.0266	0.0415	0.0404
TRAV12-2	TRAJ15	0	0	0	0.0284	0.0243	0.0338	0	0	0.0288	0.0048	0.041	0.0318
TRAV12-3	TRAJ15	0.0111	0.0082	0.0084	0	0	0	0.0092	0.0016	0	0	-0.0132	0.0318
TRAV12-1	TRAJ15	0.0334	0.0082	0.0586	0.0189	0	0	0.0334	0.0252	0.0063	0.0109	-0.0383	0.092
TRAV12D-2	TRAJ15	0.2005	0.0409	0.1004	0.1326	0.0365	0.0507	0.1139	0.0807	0.0733	0.0519	-0.0536	0.3313
TRAV12N-3	TRAJ15	0.323	0.1228	0.0837	0.1326	0.0365	0.0338	0.1765	0.1284	0.0676	0.0563	-0.1401	0.1914
TRAV12D-3	TRAJ16	0	0	0	0.0663	0	0.0169	0	0	0.0277	0.0345	0.0394	0.0984
TRAV12-2	TRAJ16	0	0.0082	0	0.0095	0.0365	0.0254	0.0027	0.0047	0.0238	0.0136	0.03	0.0383
TRAV12-1	TRAJ16	0	0	0	0.0189	0	0	0	0	0.0063	0.0109	0.0091	0.2525
TRAV12-3	TRAJ16	0.0111	0	0	0	0	0	0.0037	0.0064	0	0	-0.0053	0.2525
TRAV12D-1	TRAJ16	0.0223	0	0.0251	0	0	0	0.0158	0.0138	0	0	-0.0226	0.0984
TRAV12N-3	TRAJ16	0.0668	0.0246	0	0.0379	0	0	0.0305	0.0338	0.0126	0.0219	-0.0253	0.3214
TRAV12D-2	TRAJ16	0.078	0.1146	0.0586	0.0568	0.0608	0.0507	0.0837	0.0284	0.0561	0.0051	-0.0372	0.0952
TRAV12D-3	TRAJ17	0	0	0	0.0095	0	0.0169	0	0	0.0088	0.0085	0.0126	0.0984
TRAV12-2	TRAJ17	0	0	0.0084	0.0189	0	0	0.0028	0.0048	0.0063	0.0109	0.005	0.5
TRAV12-3	TRAJ17	0	0.0082	0	0.0095	0	0	0.0027	0.0047	0.0032	0.0055	0.0007	0.5
TRAV12-1	TRAJ17	0.0111	0.0164	0.0502	0.0095	0	0.0423	0.0259	0.0212	0.0173	0.0222	-0.0121	0.1914
TRAV12D-1	TRAJ17	0.0334	0	0.0251	0.0095	0	0	0.0195	0.0174	0.0032	0.0055	-0.0233	0.1768
TRAV12N-3	TRAJ17	0.0891	0.0246	0.0418	0.0379	0.0122	0.0085	0.0518	0.0334	0.0195	0.016	-0.045	0.0952
TRAV12D-2	TRAJ17	0.1671	0.0328	0.1088	0.0757	0.0243	0.0592	0.1029	0.0673	0.0531	0.0262	-0.0667	0.1914
TRAV12D-3	TRAJ18	0	0	0	0.0852	0.0122	0.0676	0	0	0.055	0.0381	0.0772	0.0318
TRAV12D-1	TRAJ18	0.0111	0	0	0.0473	0.0243	0.0254	0.0037	0.0064	0.0323	0.013	0.0405	0.0383
TRAV12-2	TRAJ18	0	0	0	0.0284	0.0243	0.0169	0	0	0.0232	0.0058	0.0331	0.0318
TRAV12D-2	TRAJ18	0.1114	0.0901	0.0837	0.1136	0.1094	0.1268	0.0951	0.0145	0.1166	0.0091	0.028	0.0952
TRAV12-1	TRAJ18	0.0223	0	0.0251	0.0095	0	0.0254	0.0158	0.0138	0.0116	0.0128	-0.006	0.4124
TRAV12-3	TRAJ18	0.0557	0.0164	0.0335	0.0095	0	0.0169	0.0352	0.0197	0.0088	0.0085	-0.0373	0.0952
TRAV12N-3	TRAJ18	0.1894	0.0328	0.0251	0.0189	0.0122	0.0169	0.0824	0.0927	0.016	0.0034	-0.0913	0.0404
TRAV12-2	TRAJ21	0.0111	0	0	0.0284	0.0243	0.0254	0.0037	0.0064	0.026	0.0021	0.0317	0.0383
TRAV12D-1	TRAJ21	0.0111	0.0246	0.0251	0.0189	0.0243	0.0592	0.0203	0.0079	0.0341	0.0219	0.0194	0.5
TRAV12D-3	TRAJ21	0	0	0	0.0095	0.0122	0	0	0	0.0072	0.0064	0.0104	0.0984
TRAV12-1	TRAJ21	0.0223	0.0409	0	0.0189	0	0	0.0211	0.0205	0.0063	0.0109	-0.0211	0.1768
TRAV12-3	TRAJ21	0.0334	0	0.0418	0.0189	0	0.0085	0.0251	0.0221	0.0091	0.0095	-0.0227	0.2533
TRAV12N-3	TRAJ21	0.0891	0.0573	0.1172	0.0663	0.0122	0.0085	0.0879	0.03	0.029	0.0324	-0.0803	0.0952
TRAV12D-2	TRAJ21	0.1448	0.0819	0.1004	0.0757	0.0486	0.0169	0.109	0.0323	0.0471	0.0294	-0.0829	0.0404
TRAV12-2	TRAJ22	0.0111	0	0	0.0473	0.0122	0.0423	0.0037	0.0064	0.0339	0.019	0.0428	0.0383
TRAV12D-3	TRAJ22	0	0	0	0.0189	0.0122	0	0	0	0.0104	0.0096	0.0149	0.0984
TRAV12-1	TRAJ22	0.0223	0.0082	0	0.0189	0.0243	0	0.0102	0.0113	0.0144	0.0128	0.006	0.4124
TRAV12D-1	TRAJ22	0.078	0.0164	0.0251	0.0379	0.0122	0.0423	0.0398	0.0333	0.0308	0.0163	-0.0125	0.5
TRAV12-3	TRAJ22	0.0334	0.0737	0.1088	0	0	0	0.072	0.0377	0	0	-0.1003	0.0318
TRAV12N-3	TRAJ22	0.2339	0.0819	0.1507	0.0757	0.0122	0.0254	0.1555	0.0761	0.0378	0.0335	-0.155	0.0404
TRAV12D-2	TRAJ22	0.323	0.1965	0.226	0.1041	0.0486	0.0338	0.2485	0.0662	0.0622	0.0371	-0.2331	0.0404
TRAV12-2	TRAJ23	0	0.0082	0.0335	0.0379	0.0608	0.1859	0.0139	0.0175	0.0949	0.0797	0.1109	0.0404
TRAV12D-3	TRAJ23	0	0.0082	0	0.1041	0.0486	0.093	0.0027	0.0047	0.0819	0.0294	0.1097	0.0383
TRAV12-1	TRAJ23	0.0557	0.0082	0	0.0757	0.0851	0.0338	0.0213	0.0301	0.0649	0.0273	0.0603	0.0952
TRAV12D-1	TRAJ23	0.0557	0.0164	0	0.0568	0.0608	0.0169	0.024	0.0286	0.0448	0.0243	0.029	0.0952
TRAV12-3	TRAJ23	0.0668	0.0246	0.0502	0.0095	0	0.0169	0.0472	0.0213	0.0088	0.0085	-0.0539	0.0404
TRAV12D-2	TRAJ23	0.3008	0.1065	0.3097	0.2178	0.1094	0.1775	0.239	0.1148	0.1682	0.0548	-0.0849	0.3313
TRAV12N-3	TRAJ23	0.2451	0.1228	0.2511	0.0947	0	0.0254	0.2063	0.0724	0.04	0.049	-0.214	0.0404
TRAV12D-1	TRAJ24	0	0.0082	0	0.0095	0	0.0085	0.0027	0.0047	0.006	0.0052	0.0047	0.1768
TRAV12-2	TRAJ24	0	0	0	0.0095	0	0	0	0	0.0032	0.0055	0.0046	0.2525
TRAV12-1	TRAJ24	0.0111	0	0	0.0189	0	0	0.0037	0.0064	0.0063	0.0109	0.0037	0.5
TRAV12N-3	TRAJ24	0.0334	0.0409	0.0084	0.0284	0.0243	0.0254	0.0276	0.017	0.026	0.0021	-0.0022	0.3313
TRAV12-3	TRAJ24	0.0111	0	0	0	0	0	0.0037	0.0064	0	0	-0.0053	0.2525
TRAV12D-2	TRAJ24	0.0334	0.0082	0.0251	0.0379	0	0.0085	0.0222	0.0128	0.0155	0.0199	-0.0095	0.5
TRAV12D-3	TRAJ26	0	0.0082	0	0.0473	0.0729	0.0423	0.0027	0.0047	0.0542	0.0164	0.0723	0.0383
TRAV12-2	TRAJ26	0	0.0164	0	0.0379	0.0486	0	0.0055	0.0095	0.0288	0.0255	0.033	0.1768
TRAV12-1	TRAJ26	0.0111	0.0573	0.0084	0.0189	0.0243	0.0592	0.0256	0.0275	0.0341	0.0219	0.0119	0.1914
TRAV12D-1	TRAJ26	0.0111	0	0.0502	0.0284	0.0122	0.0085	0.0204	0.0264	0.0164	0.0106	-0.0057	0.5
TRAV12-3	TRAJ26	0.0334	0	0	0	0	0.0169	0.0111	0.0193	0.0056	0.0098	-0.0079	0.5
TRAV12N-3	TRAJ26	0.156	0.1474	0.0586	0.0568	0.0486	0	0.1207	0.0539	0.0351	0.0307	-0.1146	0.0404
TRAV12D-2	TRAJ26	0.2005	0.2129	0.2176	0.1041	0.1094	0.0676	0.2103	0.0088	0.0937	0.0228	-0.1461	0.0404
TRAV12D-3	TRAJ27	0	0.0246	0	0.0757	0.1216	0.0169	0.0082	0.0142	0.0714	0.0525	0.0877	0.092
TRAV12-2	TRAJ27	0	0	0.0084	0.0284	0.0243	0.093	0.0028	0.0048	0.0486	0.0385	0.0644	0.0383
TRAV12-1	TRAJ27	0.0668	0	0	0.0189	0	0.0169	0.0223	0.0386	0.0119	0.0104	-0.0148	0.5
TRAV12D-1	TRAJ27	0	0.0409	0.0753	0.0473	0.0122	0.0169	0.0387	0.0377	0.0255	0.0191	-0.0185	0.5
TRAV12N-3	TRAJ27	0.0557	0.0819	0.0167	0.0757	0.0122	0.0085	0.0514	0.0328	0.0321	0.0378	-0.0267	0.1914
TRAV12D-2	TRAJ27	0.2562	0.0573	0.0837	0.1326	0.0851	0.0676	0.1324	0.108	0.0951	0.0336	-0.0483	0.5
TRAV12-3	TRAJ27	0.0223	0.0491	0.0502	0	0.0122	0	0.0405	0.0158	0.0041	0.007	-0.0514	0.0383
TRAV12D-3	TRAJ28	0	0	0	0.0379	0	0.0085	0	0	0.0155	0.0199	0.0222	0.0984
TRAV12D-1	TRAJ28	0	0.0082	0	0.0189	0.0122	0.0169	0.0027	0.0047	0.016	0.0034	0.019	0.0383
TRAV12-2	TRAJ28	0	0	0	0.0189	0	0	0	0	0.0063	0.0109	0.0091	0.2525
TRAV12-1	TRAJ28	0	0	0	0.0095	0	0	0	0	0.0032	0.0055	0.0046	0.2525
TRAV12-3	TRAJ28	0.0111	0.0082	0	0	0	0	0.0064	0.0058	0	0	-0.0092	0.0984
TRAV12N-3	TRAJ28	0.0557	0.0082	0.0167	0	0	0	0.0269	0.0253	0	0	-0.0383	0.0318
TRAV12D-2	TRAJ28	0.0668	0.0246	0.0418	0.0189	0	0.0085	0.0444	0.0212	0.0091	0.0095	-0.0496	0.0404
TRAV12D-1	TRAJ30	0.0223	0.0164	0.0335	0.0852	0.0365	0.0169	0.0241	0.0087	0.0462	0.0352	0.0308	0.1914
TRAV12D-3	TRAJ30	0	0	0	0	0.0122	0.0169	0	0	0.0097	0.0087	0.0139	0.0984
TRAV12-1	TRAJ30	0.0223	0.0082	0	0.0379	0.0122	0	0.0102	0.0113	0.0167	0.0193	0.0093	0.4124
TRAV12-2	TRAJ30	0	0.0164	0	0.0189	0.0122	0	0.0055	0.0095	0.0104	0.0096	0.007	0.3214
TRAV12-3	TRAJ30	0.0334	0.0246	0	0.0095	0	0	0.0193	0.0173	0.0032	0.0055	-0.023	0.1768
TRAV12N-3	TRAJ30	0.0223	0.0573	0.0335	0	0.0122	0.0169	0.0377	0.0179	0.0097	0.0087	-0.0395	0.0404
TRAV12D-2	TRAJ30	0.0223	0.1146	0.1255	0.0473	0.0608	0.0507	0.0875	0.0567	0.0529	0.007	-0.0466	0.3313
TRAV12D-3	TRAJ31	0	0.0491	0	0.0757	0.1337	0.0338	0.0164	0.0283	0.0811	0.0502	0.089	0.092
TRAV12-1	TRAJ31	0.0334	0.0328	0	0.0568	0.1216	0.0592	0.0221	0.0191	0.0792	0.0367	0.0784	0.0404
TRAV12-2	TRAJ31	0	0.0164	0.0251	0.0284	0.0486	0	0.0138	0.0127	0.0257	0.0244	0.0168	0.2533
TRAV12-3	TRAJ31	0.0668	0.0573	0.067	0.0379	0	0.0169	0.0637	0.0055	0.0183	0.019	-0.0629	0.0404
TRAV12D-1	TRAJ31	0.0668	0.0819	0.1004	0.0473	0.0243	0.0169	0.083	0.0168	0.0295	0.0159	-0.0731	0.0404
TRAV12D-2	TRAJ31	0.4122	0.1883	0.2092	0.1515	0.1702	0.2113	0.2699	0.1237	0.1777	0.0306	-0.1087	0.1914
TRAV12N-3	TRAJ31	0.2785	0.0409	0.0418	0.0852	0	0.0085	0.1204	0.1369	0.0312	0.0469	-0.1197	0.1914
TRAV12-2	TRAJ32	0.0111	0.0246	0	0.1231	0.1216	0.0423	0.0119	0.0123	0.0957	0.0462	0.1148	0.0404
TRAV12D-3	TRAJ32	0	0.0082	0	0.0473	0.0486	0.0254	0.0027	0.0047	0.0404	0.013	0.0532	0.0383
TRAV12-1	TRAJ32	0.0111	0.0082	0.0167	0.0284	0.0122	0.0085	0.012	0.0043	0.0164	0.0106	0.0063	0.3313
TRAV12N-3	TRAJ32	0.0668	0.0246	0.0418	0.0473	0	0.0085	0.0444	0.0212	0.0186	0.0252	-0.0361	0.1914
TRAV12D-1	TRAJ32	0.0223	0.0082	0.1088	0.0379	0	0.0169	0.0464	0.0545	0.0183	0.019	-0.0393	0.3313
TRAV12-3	TRAJ32	0.0334	0.0491	0.0837	0.0189	0.0122	0.0254	0.0554	0.0257	0.0188	0.0066	-0.0509	0.0404
TRAV12D-2	TRAJ32	0.156	0.0737	0.0921	0.0473	0.0243	0.0085	0.1073	0.0432	0.0267	0.0195	-0.109	0.0404
TRAV12-2	TRAJ33	0.0111	0.0082	0	0.0189	0.0243	0.0507	0.0064	0.0058	0.0313	0.017	0.0353	0.0404
TRAV12D-3	TRAJ33	0	0	0	0.0189	0.0122	0.0338	0	0	0.0216	0.0111	0.0308	0.0318
TRAV12-1	TRAJ33	0.0111	0	0	0.0095	0	0	0.0037	0.0064	0.0032	0.0055	-0.0007	0.5
TRAV12-3	TRAJ33	0.0111	0	0.0418	0	0	0	0.0176	0.0217	0	0	-0.0252	0.0984
TRAV12D-1	TRAJ33	0.0334	0.0082	0.0418	0.0189	0	0	0.0278	0.0175	0.0063	0.0109	-0.0305	0.092
TRAV12D-2	TRAJ33	0.1225	0.1802	0.1172	0.1136	0.0486	0.0592	0.14	0.0349	0.0738	0.0349	-0.0863	0.0404
TRAV12N-3	TRAJ33	0.1225	0.0573	0.0418	0	0	0.0254	0.0739	0.0428	0.0085	0.0147	-0.0906	0.0383
TRAV12D-3	TRAJ34	0	0.0246	0	0.0757	0.1216	0.0761	0.0082	0.0142	0.0911	0.0264	0.114	0.0383
TRAV12-2	TRAJ34	0.0334	0.0082	0	0.0663	0.0243	0.0254	0.0139	0.0174	0.0387	0.0239	0.0349	0.1914
TRAV12D-1	TRAJ34	0.0223	0	0	0.0379	0	0	0.0074	0.0129	0.0126	0.0219	0.0074	0.5
TRAV12-1	TRAJ34	0.0111	0	0	0.0095	0	0.0169	0.0037	0.0064	0.0088	0.0085	0.0073	0.3214
TRAV12-3	TRAJ34	0.0446	0.0246	0.0335	0.0284	0	0	0.0342	0.01	0.0095	0.0164	-0.0349	0.092
TRAV12N-3	TRAJ34	0.1337	0.0491	0.1255	0.0663	0.0122	0.0169	0.1028	0.0467	0.0318	0.03	-0.096	0.0952
TRAV12D-2	TRAJ34	0.2117	0.1228	0.2092	0.1326	0.0608	0.0254	0.1812	0.0506	0.0729	0.0546	-0.1387	0.0952
TRAV12D-3	TRAJ35	0	0.0246	0	0	0.0729	0.1099	0.0082	0.0142	0.0609	0.0559	0.0735	0.1768
TRAV12-2	TRAJ35	0	0	0	0.0189	0.0122	0.1183	0	0	0.0498	0.0594	0.0701	0.0318
TRAV12-1	TRAJ35	0	0	0	0.0189	0	0	0	0	0.0063	0.0109	0.0091	0.2525
TRAV12D-2	TRAJ35	0.0111	0	0.0251	0	0	0.0338	0.0121	0.0126	0.0113	0.0195	-0.0011	0.5
TRAV12-3	TRAJ35	0.0111	0.0164	0.0084	0	0	0	0.012	0.0041	0	0	-0.0172	0.0318
TRAV12D-3	TRAJ37	0	0	0	0.0947	0.0729	0.0507	0	0	0.0728	0.022	0.1014	0.0318
TRAV12-2	TRAJ37	0.0111	0	0	0.0947	0	0.0254	0.0037	0.0064	0.04	0.049	0.0513	0.1768
TRAV12-1	TRAJ37	0	0.0164	0	0.0284	0	0.0085	0.0055	0.0095	0.0123	0.0146	0.0097	0.3214
TRAV12D-1	TRAJ37	0.0111	0.0082	0.0167	0	0.0122	0.0254	0.012	0.0043	0.0125	0.0127	0.0007	0.5
TRAV12N-3	TRAJ37	0.0223	0.0409	0.0251	0.0284	0	0.0085	0.0294	0.01	0.0123	0.0146	-0.0242	0.1914
TRAV12D-2	TRAJ37	0.156	0.0655	0.0586	0.1041	0.0486	0.0423	0.0934	0.0544	0.065	0.034	-0.038	0.1914
TRAV12-3	TRAJ37	0.0891	0.0328	0.1172	0.0852	0.0122	0.0085	0.0797	0.043	0.0353	0.0433	-0.0606	0.0952
TRAV12-2	TRAJ38	0	0	0	0	0.0243	0.0169	0	0	0.0137	0.0125	0.0196	0.0984
TRAV12D-1	TRAJ38	0	0	0	0.0095	0.0122	0	0	0	0.0072	0.0064	0.0104	0.0984
TRAV12-1	TRAJ38	0	0.0082	0	0	0.0122	0.0085	0.0027	0.0047	0.0069	0.0063	0.006	0.1768
TRAV12-3	TRAJ38	0.0111	0	0	0	0	0	0.0037	0.0064	0	0	-0.0053	0.2525
TRAV12N-3	TRAJ38	0	0.0246	0	0	0	0	0.0082	0.0142	0	0	-0.0118	0.2525
TRAV12D-2	TRAJ38	0.0557	0.0082	0	0.0095	0	0	0.0213	0.0301	0.0032	0.0055	-0.0258	0.3214
TRAV12-2	TRAJ39	0	0.0164	0	0.0568	0.0972	0	0.0055	0.0095	0.0513	0.0488	0.0643	0.1768
TRAV12-3	TRAJ39	0.0557	0.0328	0.0586	0.0473	0.1337	0.0254	0.049	0.0141	0.0688	0.0573	0.027	0.5
TRAV12D-3	TRAJ39	0	0.0082	0	0.0189	0.0365	0.0085	0.0027	0.0047	0.0213	0.0142	0.0265	0.0383
TRAV12-1	TRAJ39	0	0	0	0.0095	0	0.0085	0	0	0.006	0.0052	0.0086	0.0984
TRAV12D-1	TRAJ39	0.0446	0	0	0.0095	0	0	0.0149	0.0257	0.0032	0.0055	-0.0167	0.5
TRAV12N-3	TRAJ39	0.0334	0.0246	0.0084	0.0095	0.0122	0	0.0221	0.0127	0.0072	0.0064	-0.0212	0.1914
TRAV12D-2	TRAJ39	0.1448	0.1228	0.067	0.0473	0.0122	0.0423	0.1115	0.0401	0.0339	0.019	-0.1044	0.0404
TRAV12-2	TRAJ40	0.0111	0	0	0.0379	0.0122	0.0423	0.0037	0.0064	0.0308	0.0163	0.0384	0.0383
TRAV12D-3	TRAJ40	0	0	0	0.0189	0	0.0338	0	0	0.0176	0.0169	0.0252	0.0984
TRAV12D-1	TRAJ40	0.0111	0	0	0.0095	0	0.0085	0.0037	0.0064	0.006	0.0052	0.0033	0.5
TRAV12-1	TRAJ40	0.0223	0	0.0084	0	0	0.0254	0.0102	0.0113	0.0085	0.0147	-0.0024	0.5
TRAV12-3	TRAJ40	0.0446	0.0082	0.0084	0.0379	0	0	0.0204	0.021	0.0126	0.0219	-0.0111	0.1879
TRAV12N-3	TRAJ40	0.0557	0	0	0	0	0	0.0186	0.0322	0	0	-0.0266	0.2525
TRAV12D-2	TRAJ40	0.078	0.1474	0.1339	0.0473	0.0122	0.0254	0.1198	0.0368	0.0283	0.0177	-0.123	0.0404
TRAV12-2	TRAJ42	0	0	0.0084	0.0379	0	0.0507	0.0028	0.0048	0.0295	0.0264	0.0379	0.1768
TRAV12D-3	TRAJ42	0	0.0082	0	0.0379	0.0122	0.0169	0.0027	0.0047	0.0223	0.0137	0.0279	0.0383
TRAV12-1	TRAJ42	0.0111	0	0.0251	0.0379	0	0.0169	0.0121	0.0126	0.0183	0.019	0.0088	0.4124
TRAV12N-3	TRAJ42	0.0111	0.0164	0.0251	0.0095	0.0122	0	0.0175	0.0071	0.0072	0.0064	-0.0147	0.0952
TRAV12D-2	TRAJ42	0.0891	0.0409	0.0837	0.1231	0.0486	0.0085	0.0712	0.0264	0.0601	0.0582	-0.015	0.5
TRAV12-3	TRAJ42	0.0334	0.0246	0.0753	0.0757	0.0122	0.0085	0.0444	0.0271	0.0321	0.0378	-0.0171	0.3313
TRAV12D-1	TRAJ42	0.0223	0.0164	0.0502	0.0095	0.0122	0.0085	0.0296	0.0181	0.0101	0.0019	-0.0276	0.0404
TRAV12D-3	TRAJ43	0	0	0	0.0379	0.0122	0.0676	0	0	0.0392	0.0277	0.0555	0.0318
TRAV12-2	TRAJ43	0.0111	0.0164	0	0.0379	0.0851	0.0169	0.0092	0.0084	0.0466	0.0349	0.0525	0.0404
TRAV12N-3	TRAJ43	0.0223	0	0	0.0189	0	0	0.0074	0.0129	0.0063	0.0109	-0.0016	0.5
TRAV12D-1	TRAJ43	0.0111	0.0246	0.0251	0.0284	0.0122	0	0.0203	0.0079	0.0135	0.0142	-0.0096	0.5
TRAV12-1	TRAJ43	0.0223	0.0082	0.0251	0.0189	0	0.0085	0.0185	0.0091	0.0091	0.0095	-0.0134	0.1914
TRAV12-3	TRAJ43	0.0111	0.0655	0.0502	0.0568	0	0.0085	0.0423	0.0281	0.0218	0.0306	-0.0287	0.1914
TRAV12D-2	TRAJ43	0.0891	0.0491	0.1925	0.0284	0	0.0169	0.1102	0.074	0.0151	0.0143	-0.1292	0.0404
TRAV12-2	TRAJ44	0	0	0	0.0095	0	0	0	0	0.0032	0.0055	0.0046	0.2525
TRAV12-3	TRAJ44	0	0.0082	0	0	0	0	0.0027	0.0047	0	0	-0.0039	0.2525
TRAV12D-1	TRAJ44	0.0111	0	0	0	0	0	0.0037	0.0064	0	0	-0.0053	0.2525
TRAV12D-2	TRAJ44	0	0.0246	0	0	0.0122	0	0.0082	0.0142	0.0041	0.007	-0.0059	0.5
TRAV12D-3	TRAJ45	0	0	0	0.0757	0.0243	0	0	0	0.0333	0.0387	0.0473	0.0984
TRAV12-2	TRAJ45	0	0	0	0.0095	0.0486	0.0085	0	0	0.0222	0.0229	0.0317	0.0318
TRAV12D-1	TRAJ45	0	0.0082	0.0084	0.0473	0.0122	0.0085	0.0055	0.0048	0.0227	0.0214	0.0245	0.0404
TRAV12N-3	TRAJ45	0	0	0	0.0095	0	0	0	0	0.0032	0.0055	0.0046	0.2525
TRAV12-3	TRAJ45	0	0.0164	0.0167	0	0.0122	0.0085	0.011	0.0096	0.0069	0.0063	-0.0059	0.2533
TRAV12D-2	TRAJ45	0.0668	0.0491	0.067	0	0.0243	0.0085	0.061	0.0103	0.0109	0.0123	-0.0698	0.0404
TRAV12-2	TRAJ48	0	0.0082	0.0084	0.0284	0.0486	0.0338	0.0055	0.0048	0.0369	0.0105	0.0444	0.0404
TRAV12D-1	TRAJ48	0	0.0328	0.0251	0.0189	0.0972	0.0254	0.0193	0.0172	0.0472	0.0435	0.039	0.3313
TRAV12-1	TRAJ48	0	0	0	0.0095	0.0243	0.0254	0	0	0.0197	0.0089	0.0281	0.0318
TRAV12D-3	TRAJ48	0	0	0	0.0189	0.0122	0.0254	0	0	0.0188	0.0066	0.0269	0.0318
TRAV12-3	TRAJ48	0	0	0.0084	0.0284	0	0.0085	0.0028	0.0048	0.0123	0.0146	0.0136	0.1768
[truncated: 1,068 more rows]

## Sheet: legend
Newly developing CD4(+)CD8(-)GFP(+)Thy1.1(+) Treg were FACS-sorted from thymi of eight-week-old B6 and NOD female Rag-Gfp Foxp3-Thy1a mice, mRNA isolated, TCRa libraries generated and sequenced, and data processed as described in the "Research design and methods" section.
